# Supplementary material
Source: PubMed Central journal article supplement (PMC2860298)

*Supporting Information*

**Enantioselective, Organocatalytic Reduction of Ketones using  
Bifunctional Thiourea-Amine Catalysts**

De Run Li, Anyu He and J. R. Falck\*

*Departments of Biochemistry and Pharmacology, University of Texas Southwestern Medical Center  
Dallas, Texas 75390 USA*

*E-mail: [j.falck@utsouthwestern.edu](mailto:j.falck@utsouthwestern.edu)*

|                                              |    |
|----------------------------------------------|----|
| I. General information                       | 2  |
| II. Preparation of catalysts                 | 3  |
| III. Reaction parameter optimization         | 6  |
| IV. General reduction procedure and examples | 10 |
| V. Chiral HPLC analyses                      | 18 |
| VI. NMR spectra                              | 36 |

## I. General information

All reactions were maintained under an argon atmosphere. Anhydrous solvents were freshly distilled from sodium benzophenone ketyl, except for  $\text{CH}_2\text{Cl}_2$ , which was distilled from  $\text{CaH}_2$ . Extracts were dried over anhydrous  $\text{Na}_2\text{SO}_4$  and then filtered prior to removal of all volatiles under reduced pressure. Unless otherwise noted, commercially available materials were used without further purification. Flash chromatography (FC) was performed using silica gel 60 (240–400 mesh). Thin layer chromatography was performed using commercial pre-coated glass plates (silica gel 60 PF254, 0.25 mm).

Nuclear magnetic resonance (NMR) spectra were recorded at operating frequencies of 300/400 MHz ( $^1\text{H}$ ) or 75/100 MHz ( $^{13}\text{C}$ ). Chemical shifts ( $\delta$ ) are given in ppm relative to residual solvent (usually chloroform  $\delta = 7.26$  for  $^1\text{H}$  NMR or  $\delta = 77.23$  for proton decoupled  $^{13}\text{C}$  NMR) and coupling constants ( $J$ ) in Hz. Multiplicities are tabulated as s for singlet, d for doublet, t for triplet, q for quadruplet, and m for multiplet, whereby the prefix app is applied in cases where the true multiplicity is unresolved and br when the signal in question is broadened.

Ketone **29** was prepared by condensing (acetylmethylene)triphenylphosphorane with hydrocinnamaldehyde at 80 °C in toluene. Racemic alcohols were prepared by reduction of corresponding commercial ketones with  $\text{NaBH}_4$  or  $\text{NaBH}_4/\text{CeCl}_3$  (for enones)<sup>1</sup> and purified by flash column chromatography. The isothiocyanates used below were prepared according to Jacobsen.<sup>2</sup> Absolute configuration of **28**, **32**, **34**, and **36** assigned via comparison with authentic standards; the absolute configuration of **30** was made by analogy with the other examples generated using catalyst **D**.

---

(1) Luche, J.-P. *J. Am. Chem. Soc.* **1978**, *100*, 2226.

(2) Zuend, S. J.; Jacobsen, E. N. *J. Am. Chem. Soc.* **2007**, *129*, 15872–15883.

## II. Preparation of catalysts

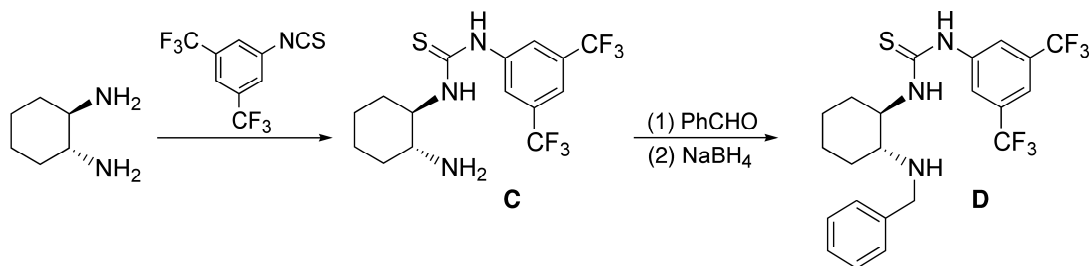

**Catalysts C and D.** 3,5-Bis(trifluoromethyl)phenyl isothiocyanate (1.3 mL, 7.1 mmol, 1.0 equiv) was added to a rt solution of (*R,R*)-cyclohexanediamine (970 mg, 8.51 mmol, 1.2 equiv) in anhydrous dichloromethane (20 mL). After 10 h, the reaction mixture was loaded onto a silica gel column and chromatographed using EtOAc/MeOH/NH<sub>4</sub>OH (200:5:1→100:20:1) to give 1-((1*R*,2*R*)-2-aminocyclohexyl)-3-(3,5-bis(trifluoromethyl)phenyl)thiourea (catalyst **C**)<sup>3</sup> (2.0 g, 73%) as a yellow foam. TLC: *R<sub>f</sub>* ~ 0.31 (EtOAc/MeOH/NH<sub>4</sub>OH, 100:5:1); [ $\alpha$ ]<sub>D</sub><sup>20</sup> = +76.9 (*c* 1.7, CHCl<sub>3</sub>); <sup>1</sup>H NMR (CDCl<sub>3</sub>, 300 MHz)  $\delta$  8.01 (s, 2H), 7.55 (s, 1H), 6.62 (br s, 1H), 3.37 (br s, 1H), 2.69-2.65 (m, 1H), 2.04 (br s, 2H, NH<sub>2</sub>), 1.98-1.91 (m, 2H), 1.80-1.65 (m, 2H), 1.40-1.20 (m, 4H); <sup>13</sup>C NMR (CDCl<sub>3</sub>, 75 MHz)  $\delta$  183.3, 142.0, 131.8 (q, *J*<sub>CF</sub> = 33.9 Hz), 128.8, 125.2, 122.9, 121.5, 117.9, 117.7, 63.4, 56.8, 35.1, 32.3, 24.7; HRMS (FAB, NBA) Calcd. for C<sub>15</sub>H<sub>18</sub>N<sub>3</sub>SF<sub>6</sub> [MH]<sup>+</sup> *m/z* 386.1125, found 386.1128.

Benzaldehyde (0.578 mL, 5.45 mmol, 1.05 equiv) was added to a rt solution of catalyst **C** (2 g, 5.19 mmol, 1.0 equiv) in anhydrous MeOH (15 mL) under an argon atmosphere. After 4 h, the reaction mixture was cooled to 0 °C and NaBH<sub>4</sub> (211 mg, 5.71 mmol, 1.1 equiv) was added in portions. After another 20 min, saturated aq. NH<sub>4</sub>Cl solution (50 mL) was added followed by conc. NH<sub>4</sub>OH (2 mL). The resulting mixture was stirred for an additional 20 min, then extracted with dichloromethane (100 mL  $\times$  5). After drying over Na<sub>2</sub>SO<sub>4</sub>, the combined organic extracts were evaporated to dryness. The residue was purified by flash chromatography on silica gel using hexanes/EtOAc/MeOH/NH<sub>4</sub>OH (400:100:5:1) to afford 1-((1*R*,2*R*)-2-(benzylamino)cyclohexyl)-3-(3,5-bis(trifluoromethyl)phenyl)thiourea (catalyst **D**)<sup>3</sup> (2.02 g, 82%) as a pale yellow foam. The product was recrystallized from hexanes/CH<sub>2</sub>Cl<sub>2</sub> as a white solid (75%), mp 140 °C-141 °C. TLC: *R<sub>f</sub>* ~ 0.48 (CH<sub>2</sub>Cl<sub>2</sub>/MeOH, 9:1); <sup>1</sup>H NMR (CDCl<sub>3</sub>, 300 MHz)  $\delta$

(3) Han, B.; Liu, Q.-P.; Li, R.; Tian, X.; Xiong, X.-F.; Deng, J.-G.; Chen, Y.-C. *Chem. Eur. J.* **2008**, *14*, 8094–8097.

7.69 (s, 2H), 7.48 (s, 1H), 7.29-7.20 (m, 5H), 6.59 (br s, 1H), 3.97 (d,  $J = 12.3$  Hz, 1H), 3.82 (d,  $J = 12.3$  Hz, 1H), 3.44 (br s, 1H), 2.49-2.42 (m, 1H), 2.18-2.00 (m, 2H), 1.90-1.75 (m, 2H), 1.40-1.20 (m, 4H);  $^{13}\text{C}$  NMR ( $\text{CDCl}_3$ , 75 MHz)  $\delta$  183.3, 141.8, 138.0, 131.5 (q,  $J_{\text{CF}} \sim 30$  Hz), 129.1, 128.6, 128.3, 128.1, 125.0, 122.4, 121.4, 117.1, 64.4, 62.5, 54.7, 33.2, 32.6, 24.9, 24.6; HRMS (FAB, NBA) Calcd. for  $\text{C}_{22}\text{H}_{24}\text{N}_3\text{SF}_6$   $[\text{MH}]^+$   $m/z$  476.1595, found 476.1598.

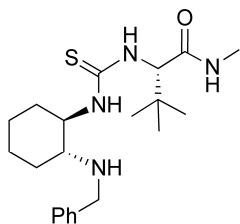

**Catalyst G.** Following the general procedure used to synthesize catalyst **D**, (*S*)-2-isothiocyanato-*N*,3,3-trimethylbutanamide was used to prepare catalyst **G** (54%).  $[\alpha]_{\text{D}}^{20} = +54.9$  ( $c$  1.30,  $\text{CHCl}_3$ );  $^1\text{H}$  NMR ( $\text{CDCl}_3$ , 300 MHz)  $\delta$  7.99 (br s, 1H), 7.39-7.20 (m, 5H), 5.94 (br s, 2H), 4.77 (d,  $J = 7.8$  Hz, 1H), 3.79 (br s, 2H), 3.45 (br s, 1H), 2.78 (d,  $J = 4.8$  Hz, 3H), 2.40-2.35 (m, 1H), 2.10-1.95 (m, 1H), 1.95-1.80 (m, 2H), 1.75-1.65 (m, 2H), 1.27-1.12 (m, 4H), 1.00 (s, 9H);  $^{13}\text{C}$  NMR ( $\text{CDCl}_3$ , 75 MHz)  $\delta$  183.4, 171.5, 139.9, 128.7 (2C), 128.4 (2C), 127.3, 67.2, 61.1, 60.2, 51.7, 34.7, 32.8, 32.0, 27.0 (3C), 26.2, 24.8, 24.7; HRMS (ES) Calcd. for  $\text{C}_{21}\text{H}_{35}\text{N}_4\text{OS}$   $[\text{MH}]^+$   $m/z$  391.2532, found 391.2529.

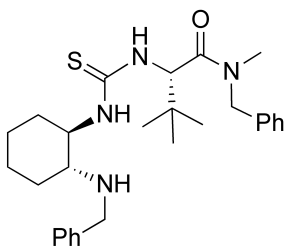

**Catalyst H.** Following the general procedure used to synthesize catalyst **D**, (*S*)-*N*-benzyl-2-isothiocyanato-*N*,3,3-trimethylbutanamide was used to prepare catalyst **H** (50%).  $[\alpha]_{\text{D}}^{20} = +24.5$  ( $c$  0.80,  $\text{CHCl}_3$ );  $^1\text{H}$  NMR ( $\text{CDCl}_3$ , 400 MHz)  $\delta$  7.92 (br s, 1H), 7.35-7.20 (m, 5H), 6.06 (d,  $J = 1.2$  Hz, 1H), 5.59 (d,  $J = 9.2$  Hz, 1H), 4.94 (d,  $J = 14.4$  Hz, 1H), 4.15 (d,  $J = 14.4$  Hz, 1H), 3.80 (d,  $J = 13.6$  Hz, 1H), 3.76 (d,  $J = 13.6$  Hz, 1H), 3.46 (br s, 2H), 3.15 (s, 3H), 2.34-2.28 (m, 1H), 2.10-1.95 (m, 1H), 1.95-1.80 (m, 2H), 1.70-1.65 (m, 2H), 1.30-1.10 (m, 4H), 1.00 (s, 9H);  $^{13}\text{C}$

NMR (CDCl<sub>3</sub>, 75 MHz)  $\delta$  183.1, 172.2, 140.1, 137.1, 128.7 (2C), 128.6 (2C), 128.4 (4C), 127.6, 127.2, 61.4, 61.1, 60.2, 51.7, 51.4, 36.3, 36.2, 32.7, 31.9, 26.9 (3C), 24.8, 24.6; HRMS (FAB, NBA) Calcd. for C<sub>28</sub>H<sub>41</sub>N<sub>4</sub>OS [MH]<sup>+</sup>  $m/z$  481.3001, found 481.2998.

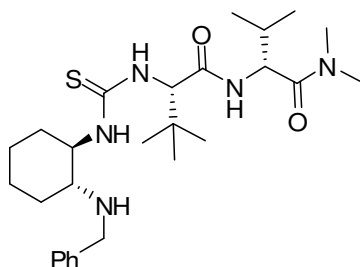

**Catalyst I.** Following the general procedure used to synthesize catalyst **D**, (*S*)-*N*-((*R*)-1-(dimethylamino)-3-methyl-1-oxobutan-2-yl)-2-isothiocyanato-3,3-dimethylbutanamide was used to prepare catalyst **I** (50%).  $[\alpha]_D^{20} = +32.9$  ( $c$  2.05, CHCl<sub>3</sub>); <sup>1</sup>H NMR (CDCl<sub>3</sub>, 300 MHz)  $\delta$  7.99 (br s, 1H), 7.29-7.18 (m, 5H), 6.75 (d,  $J = 7.8$  Hz, 1H), 6.20 (d,  $J = 5.4$  Hz, 1H), 4.78 (d,  $J = 5.1$  Hz, 1H), 4.76 (d,  $J = 5.4$  Hz, 1H), 3.77 (br s, 2H), 3.48 (br s, 1H), 3.03 (s, 3H), 2.91 (s, 3H), 2.40-2.35 (m, 1H), 2.10-1.80 (m, 3H), 1.75-1.60 (m, 2H), 1.27-1.08 (m, 4H), 1.01 (s, 9H), 0.94 (d,  $J = 7.2$  Hz, 3H), 0.86 (d,  $J = 6.6$  Hz, 3H); <sup>13</sup>C NMR (CDCl<sub>3</sub>, 75 MHz)  $\delta$  183.4, 171.1, 170.5, 140.1, 128.5 (2C), 128.3 (2C), 127.1, 67.2, 61.1, 60.2, 53.8, 51.7, 37.4, 35.7, 34.8, 32.5, 31.9, 31.7, 27.2 (3C), 24.7, 24.6, 19.9, 17.7; HRMS (ES) Calcd. for C<sub>27</sub>H<sub>46</sub>N<sub>5</sub>O<sub>2</sub>S [MH]<sup>+</sup>  $m/z$  504.3372, found 504.3374.

### III. Reaction parameter optimization

#### a. Temperature dependence

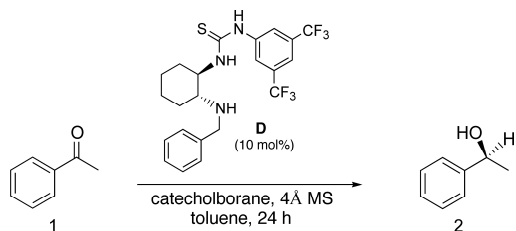

| entry | temperature (°C)                          | yield (%) | ee (%) <sup>a</sup> |
|-------|-------------------------------------------|-----------|---------------------|
| 1     | -78                                       | 24        | 73                  |
| 2     | -65                                       | 64        | 96                  |
| 3     | -59 ~ -62                                 | 80        | 97.7                |
| 4     | -55                                       | 81        | 97.9                |
| 5     | -46                                       | 88        | 98                  |
| 6     | -46 (in THF)                              | 39        | 22                  |
| 7     | -46 (in CH <sub>2</sub> Cl <sub>2</sub> ) | 49        | 49                  |
| 8     | -41 ~ -42                                 | 76        | 97.3                |
| 9     | -30                                       | 88        | 85                  |
| 10    | -20                                       | 60        | 85                  |

#### b. Catalyst survey of 4-phenylbut-3(*E*)-en-2-one

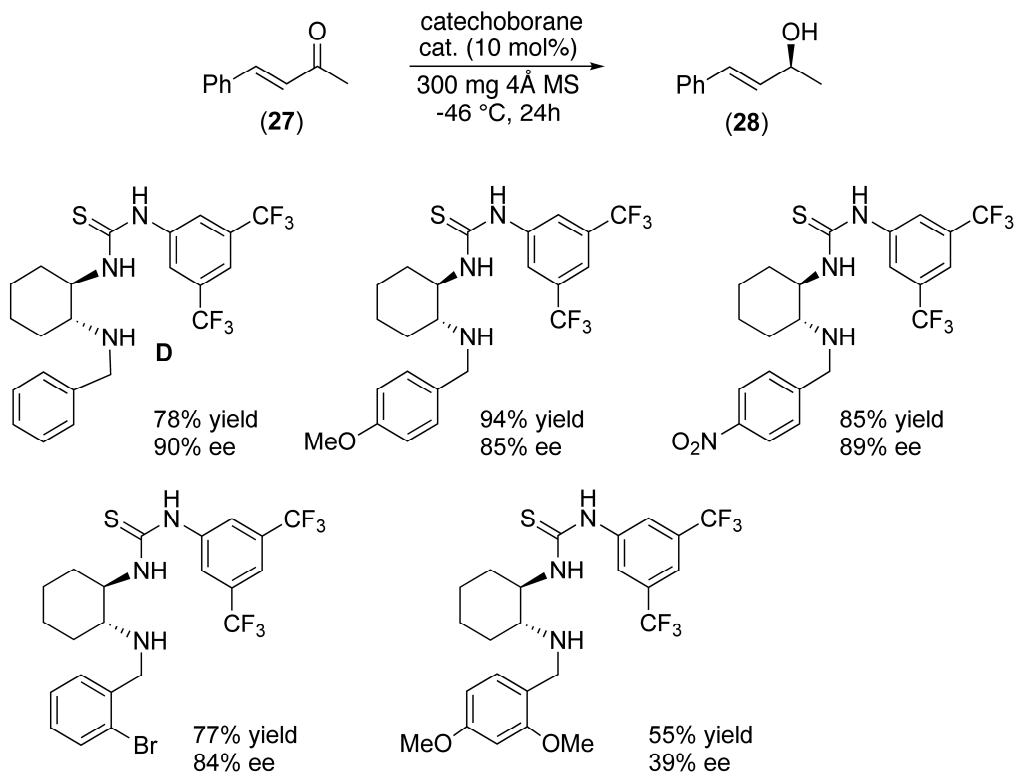

c. Catalyst survey for 6-phenylhex-3(*E*)-en-2-one (**29**)

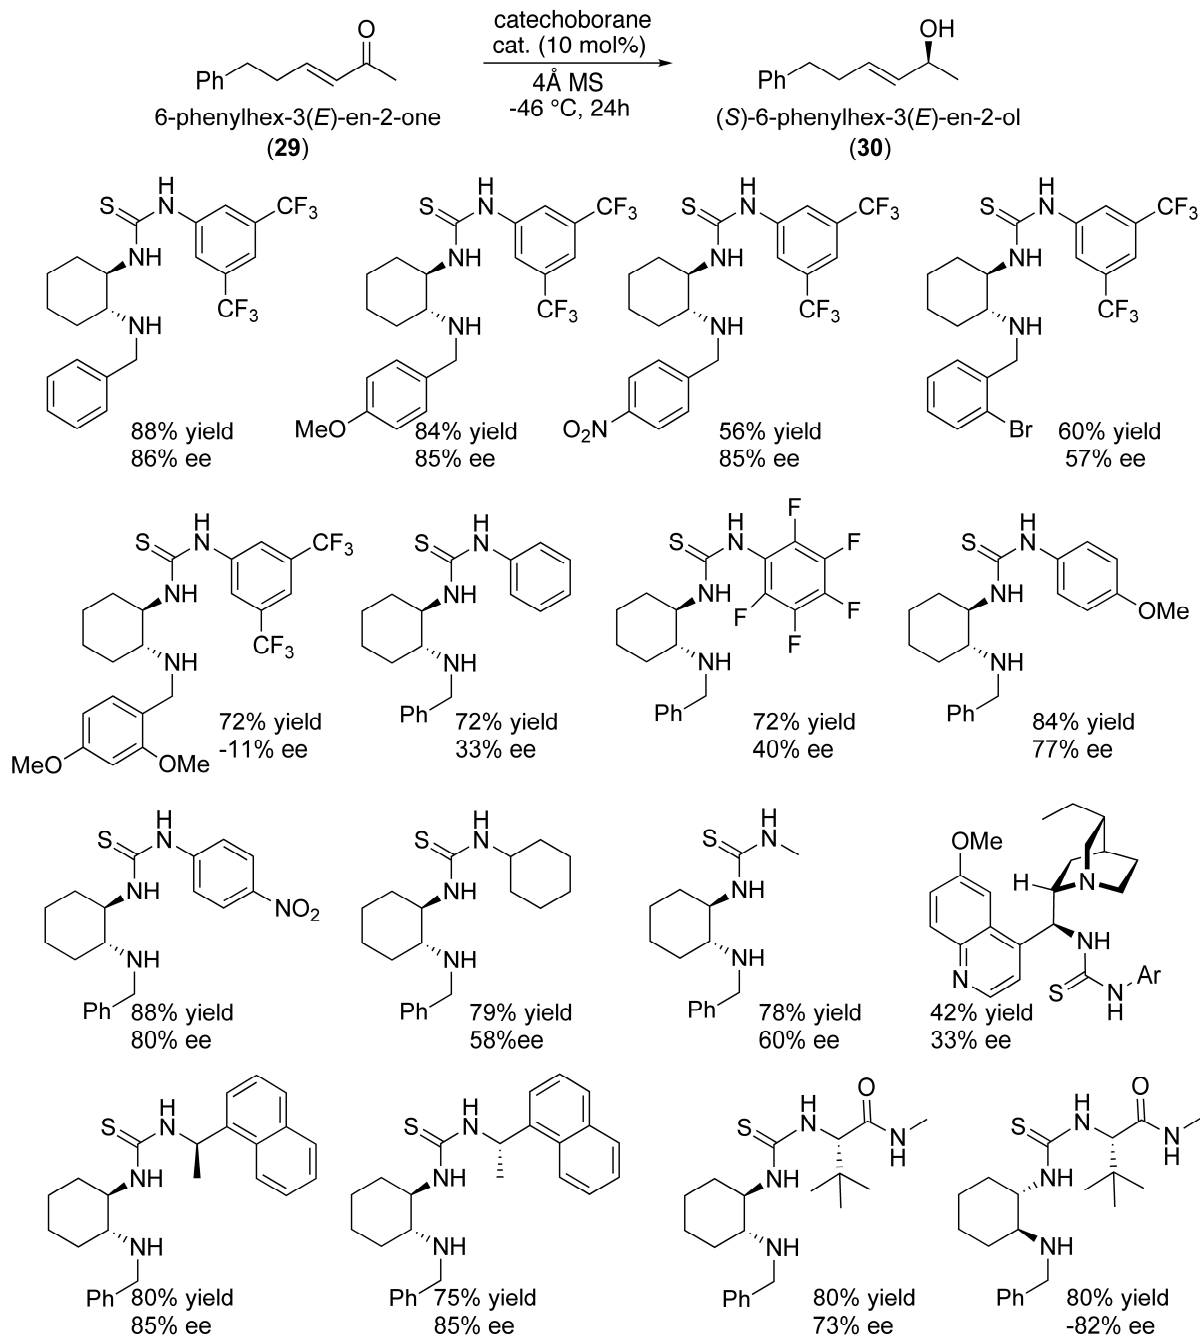

(A negative % ee indicates the *R*-enantiomer was produced)

d. Catalyst survey for 4-phenylbutan-2-one (**33**)

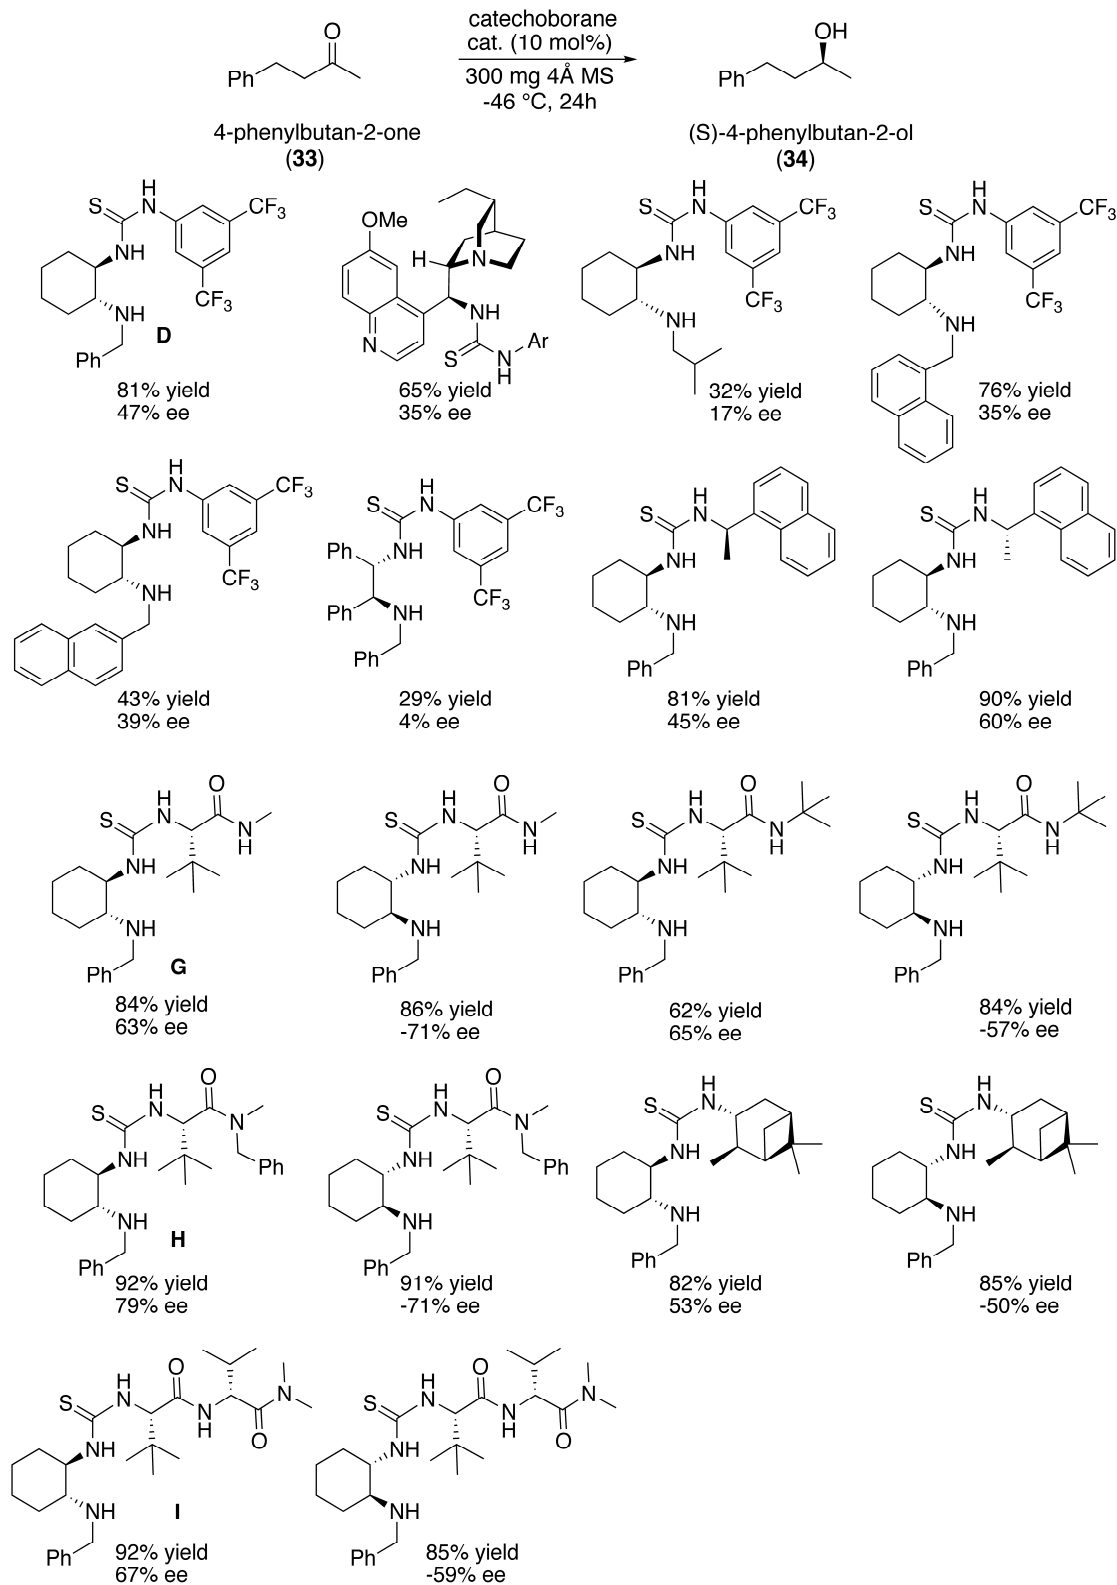



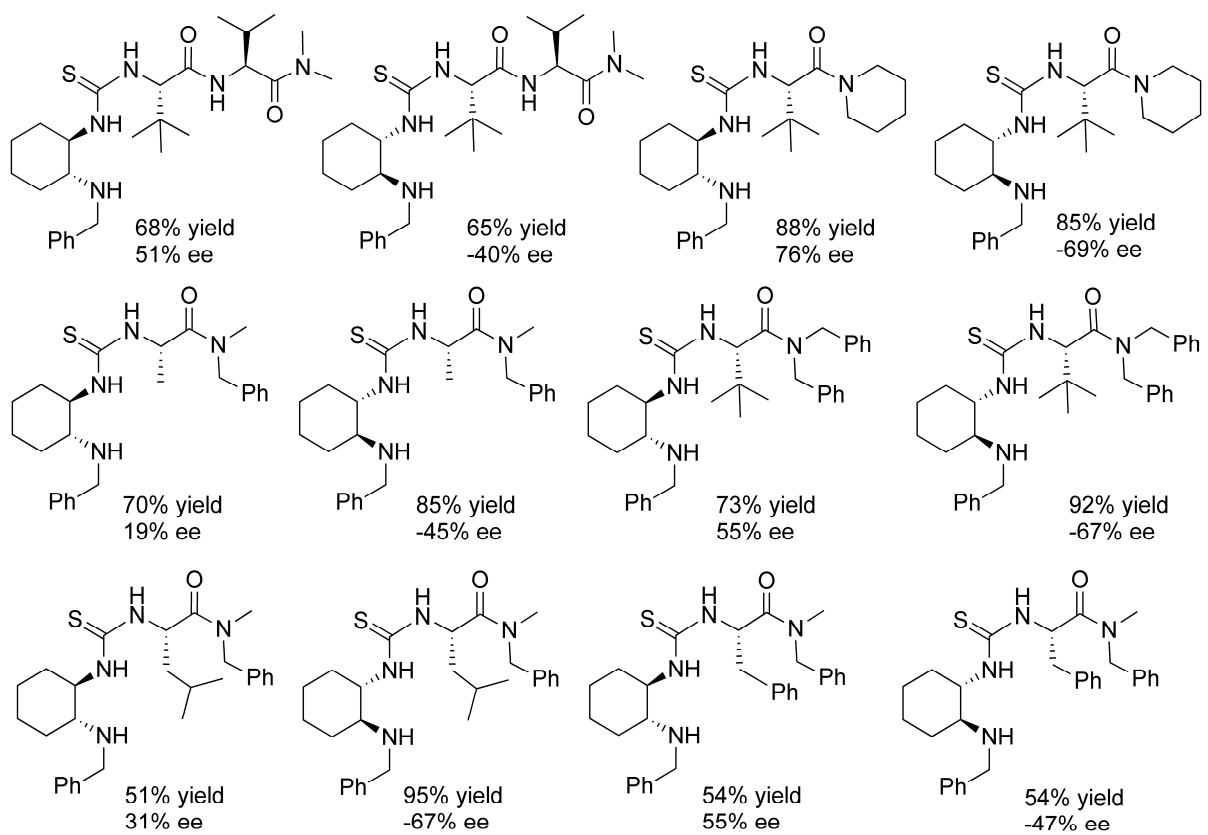

#### IV. General reduction procedure and examples

A mixture of catalyst **D** (12 mg, 0.025 mmol), 4Å molecular sieves (250 mg, freshly activated), and acetophenone (30 mg, 0.25 mmol) in toluene (0.7 mL) under an argon atmosphere was cooled to -78 °C. A solution of catecholborane (0.4 mL, 1.0 M in toluene, 0.4 mmol) was added slowly and the reaction mixture was placed in a -46 °C bath. After stirring for 24 h at -46 °C, MeOH (1 mL) followed by 3 N NaOH solution (1 mL) were added. The mixture was gradually warmed to room temperature and stirred for another 1 h and then extracted with Et<sub>2</sub>O (20 mL × 3), dried over Na<sub>2</sub>SO<sub>4</sub> and concentrated *in vacuo*. The residue was purified by flash column chromatography on silica gel using hexanes/EtOAc (6:1) as eluent to give (*S*)-1-phenylethanol (**2**) as a colorless oil (27 mg, 88%). HPLC analysis: 98% ee using Chiralcel OD column (250 mm × 4.6 mm), 2% *i*PrOH/hexane, 1.0 mL/min, 254 nm, R<sub>t</sub> (major) = 19.2 min, R<sub>t</sub> (minor) = 15.0 min; major isomer [α]<sub>D</sub><sup>20</sup> = -51.7 (*c* 1.09, CHCl<sub>3</sub>), lit.<sup>4</sup> (*R*)-1-phenylethanol, 96% ee, [α]<sub>D</sub> = +42.92 (*c* 1.04, CHCl<sub>3</sub>); <sup>1</sup>H NMR (CDCl<sub>3</sub>, 300 MHz) δ 7.38-7.23 (m, 5H), 4.87 (q, *J* = 6.3 Hz, 1H), 2.03 (br s, 1H), 1.90 (d, *J* = 6.3 Hz, 3H); <sup>13</sup>C NMR (CDCl<sub>3</sub>, 75 MHz) δ 145.9, 128.6 (2C), 127.6, 125.5 (2C), 70.5, 25.3.

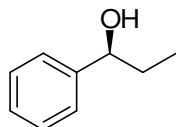

(*S*)-1-Phenylpropan-1-ol (**4**). 86% yield, 99% ee. HPLC analysis: Chiralcel OD column (250 mm × 4.6 mm), 2% *i*PrOH/hexane, 1.0 mL/min, 254 nm, R<sub>t</sub> (major) = 17.3 min, R<sub>t</sub> (minor) = 14.4 min; major isomer [α]<sub>D</sub><sup>20</sup> = -47.4 (*c* 1.48, CHCl<sub>3</sub>), lit.<sup>5</sup> (*S*)-1-phenylpropan-1-ol, 98% ee, [α]<sub>D</sub><sup>25</sup> = -48.4 (*c* 2.31, CHCl<sub>3</sub>); <sup>1</sup>H NMR (CDCl<sub>3</sub>, 300 MHz) δ 7.38-7.26 (m, 5H), 4.57 (t, *J* = 6.3 Hz, 1 H), 2.25 (br s, 1 H), 1.87-1.69 (m, 2H), 0.91 (t, *J* = 7.8 Hz, 3H); <sup>13</sup>C NMR (CDCl<sub>3</sub>, 75 MHz) δ 145.0, 128.5 (2C), 127.6, 126.1 (2C), 74.5, 41.3, 19.1, 14.1.

(4) Sokeirik, Y. S.; Mori, H.; Omote, M.; Sato, K.; Tarui, A.; Kumadaki, I.; Ando, A. *Org. Lett.* **2007**, *9*, 1927–1929.

(5) Lutz, C.; Knochel, P. *J. Org. Chem.* **1997**, *62*, 7895–7898.

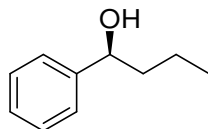

**(S)-1-Phenylbutan-1-ol (6).** 81% yield, 99% ee. HPLC analysis: Chiralcel OD column (250 mm  $\times$  4.6 mm), 1% *i*PrOH/hexane, 1.0 mL/min, 254 nm,  $R_t$  (major) = 23.8 min,  $R_t$  (minor) = 21.8 min; major isomer  $[\alpha]_D^{20} = -47.6$  (*c* 0.50,  $\text{CHCl}_3$ ), lit.<sup>6</sup> (*R*)-1-phenylbutan-1-ol, 93% ee,  $[\alpha]_D^{24} = +42$  (*c* 0.28,  $\text{CHCl}_3$ );  $^1\text{H NMR}$  ( $\text{CDCl}_3$ , 300 MHz)  $\delta$  7.38-7.26 (m, 5H), 4.64 (t,  $J = 6.3$  Hz, 1 H), 2.21 (br s, 1 H), 1.83-1.63 (m, 2H), 1.47-1.26 (m, 2H), 0.93 (t,  $J = 7.2$  Hz, 3H);  $^{13}\text{C NMR}$  ( $\text{CDCl}_3$ , 75 MHz)  $\delta$  144.7, 128.5 (2C), 127.6, 126.1 (2C), 76.1, 31.9, 10.2.

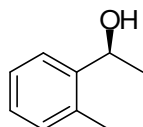

**(S)-1-*o*-Tolyethanol (8).** 71% yield, 95% ee. HPLC analysis: Chiralpak AD column (250 mm  $\times$  4.6 mm), 2% *i*PrOH/hexane, 0.5 mL/min, 254 nm,  $R_t$  (major) = 24.4 min,  $R_t$  (minor) = 21.8 min; major isomer  $[\alpha]_D^{20} = -70.0$  (*c* 1.0,  $\text{CHCl}_3$ ), lit.<sup>7</sup> (*S*)-1-*o*-tolyethanol, 98% ee,  $[\alpha]_D^{25} = -39.7$  (*c* 0.56,  $\text{CHCl}_3$ );  $^1\text{H NMR}$  ( $\text{CDCl}_3$ , 300 MHz)  $\delta$  7.52-7.49 (m, 1H), 7.27-7.12 (m, 3 H), 5.10 (q,  $J = 6.3$  Hz, 1H), 2.34 (s, 3H), 2.16 (br s, 1 H), 1.45 (d,  $J = 6.3$  Hz, 3H);  $^{13}\text{C NMR}$  ( $\text{CDCl}_3$ , 75 MHz)  $\delta$  143.9, 134.2, 130.4, 127.2, 126.4, 124.5, 66.8, 24.0, 19.0.

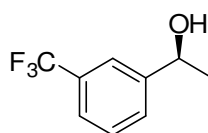

**(S)-1-(3-(Trifluoromethyl)phenyl)ethanol (10).** 92% yield, 96% ee. HPLC analysis: Chiralcel OD column (250 mm  $\times$  4.6 mm), 2% *i*PrOH/hexane, 1.0 mL/min, 254 nm,  $R_t$  (major) = 14.0 min,  $R_t$  (minor) = 17.6 min; major isomer  $[\alpha]_D^{20} = -31.0$  (*c* 1.95,  $\text{CHCl}_3$ ), lit.<sup>8</sup> (*S*)-1-(3-(trifluoromethyl)phenyl)ethanol, >99% ee,  $[\alpha]_D^{20} = -27.9$  (*c* 1.64 in  $\text{CH}_3\text{OH}$ );  $^1\text{H NMR}$  ( $\text{CDCl}_3$ ,

(6) Node, M.; Nishide, K.; Shigeta, Y.; Shiraki, H.; Obata, K. *J. Am. Chem. Soc.* **2000**, *122*, 1927–1936.

(7) Evans, D. A.; Michael, F. E.; Tedrow, J. S.; Campos, K. R. *J. Am. Chem. Soc.* **2003**, *125*, 3534–3543.

(8) Tanaka, K.; Katsurada, M.; Ohno, F.; Shiga, Y.; Oda, M. *J. Org. Chem.* **2000**, *65*, 432.

300 MHz)  $\delta$  7.63 (d,  $J$  = 0.6 Hz, 1H), 7.54-7.42 (m, 3H), 4.93 (q,  $J$  = 6.3 Hz, 1H), 2.33 (br s, 1H), 1.48 (d,  $J$  = 6.3 Hz, 3H);  $^{13}\text{C}$  NMR ( $\text{CDCl}_3$ , 75 MHz)  $\delta$  146.8, 131.0 (q,  $J_{\text{CF}}$  = 32.1 Hz), 129.1, 128.9, 124.4, 124.3, 122.4, 69.9, 25.4.

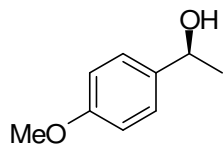

**(S)-1-(4-Methoxyphenyl)ethanol (12).** 80% yield, 97% ee. HPLC analysis: Chiralcel OB column (250 mm  $\times$  4.6 mm), 10% *i*PrOH/hexane, 0.5 mL/min, 254 nm,  $R_t$  (major) = 21.2 min,  $R_t$  (minor) = 18.6 min; major isomer  $[\alpha]_{\text{D}}^{20}$  = -52.3 ( $c$  1.55,  $\text{CHCl}_3$ ), lit.<sup>4</sup> (*R*)-1-(4-methoxyphenyl)ethanol, 92% ee,  $[\alpha]_{\text{D}}$  = +40.64 ( $c$  1.53,  $\text{CHCl}_3$ );  $^1\text{H}$  NMR ( $\text{CDCl}_3$ , 300 MHz)  $\delta$  7.30-7.25 (m, 2H), 6.89-6.84 (m, 2H), 4.82 (q,  $J$  = 6.6 Hz, 1H), 3.79 (s, 3H), 2.22 (br s, 1H), 1.46 (d,  $J$  = 6.6 Hz, 3H);  $^{13}\text{C}$  NMR ( $\text{CDCl}_3$ , 75 MHz)  $\delta$  159.0, 138.1, 126.8 (2C), 113.9 (2C), 70.0, 55.4, 25.1.

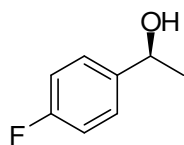

**(S)-1-(4-Fluorophenyl)ethanol (14).** 84% yield, 99% ee. HPLC analysis: Chiralcel OB column (250 mm  $\times$  4.6 mm), 1% *i*PrOH/hexane, 0.6 mL/min, 254 nm,  $R_t$  (major) = 36.4 min,  $R_t$  (minor) = 43.0 min; major isomer  $[\alpha]_{\text{D}}^{20}$  = -44.8 ( $c$  1.40,  $\text{CHCl}_3$ ), lit.<sup>9</sup> (*S*)-1-(4-fluorophenyl)ethanol, 97% ee,  $[\alpha]_{\text{D}}$  = -47.4 ( $c$  0.0576,  $\text{CHCl}_3$ );  $^1\text{H}$  NMR ( $\text{CDCl}_3$ , 300 MHz)  $\delta$  7.34-7.26 (m, 2H), 7.05-7.6.98 (m, 2H), 4.84 (q,  $J$  = 6.6 Hz, 1H), 2.27 (br s, 1H), 1.45 (d,  $J$  = 6.3 Hz, 3H);  $^{13}\text{C}$  NMR ( $\text{CDCl}_3$ , 75 MHz)  $\delta$  162.2 (d,  $J_{\text{CF}}$  = 243.8 Hz), 141.7 (d,  $J$  = 3.1 Hz), 127.2 (d,  $J$  = 7.9 Hz, 2C), 115.4 (d,  $J$  = 21.2 Hz, 2C), 69.8, 25.4.

---

(9) Carter, M. B.; Schiøtt, B.; Gutiérrez, A.; Buchwald, S. L. *J. Am. Chem. Soc.* **1994**, *116*, 11667.

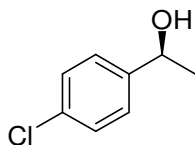

**(S)-1-(4-Chlorophenyl)ethanol (16).** 94% yield, 99% ee. HPLC analysis: Chiralcel OB column (250 mm × 4.6 mm), hexane/EtOH (60:1), 0.5 mL/min, 254 nm,  $R_t$  (major) = 22.1 min,  $R_t$  (minor) = 25.8 min; major isomer  $[\alpha]_D^{20} = -44.2$  ( $c$  1.80,  $\text{CHCl}_3$ ), lit.<sup>10</sup> (S)-1-(4-chlorophenyl)ethanol, 96% ee,  $[\alpha]_D^{27} = -45.0$  ( $c$  0.90,  $\text{CHCl}_3$ );  $^1\text{H}$  NMR ( $\text{CDCl}_3$ , 300 MHz)  $\delta$  7.33-7.25 (m, 4H), 4.86 (q,  $J = 6.0$  Hz, 1H), 2.00 (br s, 1H), 1.43 (d,  $J = 6.0$  Hz, 3H);  $^{13}\text{C}$  NMR ( $\text{CDCl}_3$ , 75 MHz)  $\delta$  144.4, 133.2, 128.7 (2C), 126.9 (2C), 69.9, 25.4.

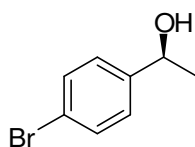

**(S)-1-(4-Bromophenyl)ethanol (18).** 95% yield, 99% ee. HPLC analysis: Chiralcel OB column (250 mm × 4.6 mm), hexane/EtOH (60:1), 0.5 mL/min, 254 nm;  $R_t$  (major) = 24.5 min,  $R_t$  (minor) = 28.9 min; major isomer  $[\alpha]_D^{20} = -36.9$  ( $c$  2.40,  $\text{CHCl}_3$ ), lit.<sup>10</sup> (S)-1-(4-bromophenyl)ethanol, 98% ee,  $[\alpha]_D^{27} = -37.3$  ( $c$  1.1,  $\text{CHCl}_3$ );  $^1\text{H}$  NMR ( $\text{CDCl}_3$ , 300 MHz)  $\delta$  7.48-7.44 (m, 2H), 7.26-7.21 (m, 2H), 4.84 (q,  $J = 6.3$  Hz, 1H), 2.02 (br s, 1H), 1.46 (d,  $J = 6.3$  Hz, 3H);  $^{13}\text{C}$  NMR ( $\text{CDCl}_3$ , 75 MHz)  $\delta$  144.9, 131.7 (2C), 127.3 (2C), 121.3, 69.9, 25.4.

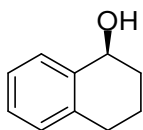

**(S)-1,2,3,4-Tetrahydronaphthalen-1-ol (20).** 86% yield, 99% ee. HPLC analysis: Chiralcel OD column (250 mm × 4.6 mm), 2% *i*PrOH/hexane, 1.0 mL/min, 254 nm,  $R_t$  (major) = 16.2 min,  $R_t$  (minor) = 18.6 min; major isomer  $[\alpha]_D^{20} = +38.9$  ( $c$  1.45,  $\text{CHCl}_3$ ), lit.<sup>7</sup> (S)-1,2,3,4-tetrahydronaphthalen-1-ol, 91% ee,  $[\alpha]_D^{25} = +31.2$  ( $c$  0.54,  $\text{CHCl}_3$ );  $^1\text{H}$  NMR ( $\text{CDCl}_3$ , 300 MHz)  $\delta$  7.44-7.41 (m, 1H), 7.23-7.19 (m, 2H), 7.12-7.10 (m, 1H), 4.77 (t,  $J = 4.5$  Hz, 1H), 2.88-2.68

(10) Utsukihara, T.; Misumi, O.; Kato, N.; Kuroiwa, T.; Horiuchi C. A. *Tetrahedron: Asymmetry* **2006**, *17*, 1179–1185.

(m, 2H), 2.05 (br s, 1H), 2.02-1.75 (m, 4H);  $^{13}\text{C}$  NMR ( $\text{CDCl}_3$ , 75 MHz)  $\delta$  138.9, 137.2, 129.1, 128.8, 127.6, 126.3, 68.2, 32.3, 29.3, 18.9.

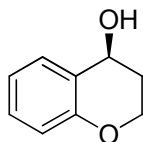

**(S)-Chroman-4-ol (22).** 95% yield, 98% ee. HPLC analysis: Chiralcel OJ-H column (250 mm  $\times$  4.6 mm), 5% *i*PrOH/hexane, 1.0 mL/min, 254 nm,  $R_t$  (major) = 16.1 min,  $R_t$  (minor) = 21.2 min; major isomer  $[\alpha]_D^{20} = -62.0$  (*c* 1.8,  $\text{CHCl}_3$ ), lit.<sup>11</sup> (*R*)-chroman-4-ol, >99% ee,  $[\alpha]_D^{20} = +65$  (*c* 1.0,  $\text{CHCl}_3$ );  $^1\text{H}$  NMR ( $\text{CDCl}_3$ , 300 MHz)  $\delta$  7.27 (dd,  $J = 7.5, 1.5$  Hz, 1H), 7.20 (dt,  $J = 9.0, 1.5$  Hz, 1H), 6.90 (dt,  $J = 6.6, 0.9$  Hz, 1H), 6.82 (d,  $J = 8.1$  Hz, 1H), 4.70 (q,  $J = 5.1$  Hz, 1H), 4.23 (dd,  $J = 3.0, 1.2$  Hz, 1H), 4.21 (d,  $J = 3.9$  Hz, 1H), 2.51 (d,  $J = 4.8$  Hz, 1H), 2.12-1.91 (m, 2H);  $^{13}\text{C}$  NMR ( $\text{CDCl}_3$ , 75 MHz)  $\delta$  154.6, 129.9, 129.8, 124.4, 120.6, 117.1, 63.2, 62.0, 30.9.

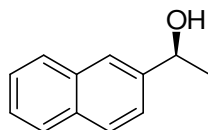

**(S)-1-(Naphthalen-2-yl)ethanol (24).** 93% yield, 98% ee. HPLC analysis: Chiralcel OJ-H column (250 mm  $\times$  4.6 mm), 5% *i*PrOH/hexane, 1.0 mL/min, 254 nm,  $R_t$  (major) = 25.7 min,  $R_t$  (minor) = 33.7 min; major isomer  $[\alpha]_D^{20} = -50.0$  (*c* 2.0,  $\text{CHCl}_3$ ), lit.<sup>7</sup> (*S*)-1-(naphthalen-2-yl)ethanol, 94% ee,  $[\alpha]_D^{25} = -40.6$  (*c* 0.8,  $\text{CHCl}_3$ );  $^1\text{H}$  NMR ( $\text{CDCl}_3$ , 300 MHz)  $\delta$  7.85-7.79 (m, 2H), 7.52-7.45 (m, 2H), 5.03 (q,  $J = 6.6$  Hz, 1H), 2.33 (br s, 1H), 1.57 (d,  $J = 6.3$  Hz, 3H);  $^{13}\text{C}$  NMR ( $\text{CDCl}_3$ , 75 MHz)  $\delta$  143.3, 133.4, 133.0, 128.4, 128.0, 127.8, 126.2, 125.9, 124.0, 123.9, 70.6, 25.2.

---

(11) Wettergren, J.; Boguevig, A.; Portier, M.; Adolfssona, H. *Adv. Synth. Catal.* **2006**, *348*, 1277–1282.

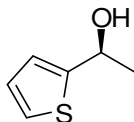

**(S)-1-(Thiophen-2-yl)ethanol (26).** 66% yield, 97% ee. HPLC analysis: Chiralcel OD column (250 mm × 4.6 mm), 2% *i*PrOH/hexane, 1.0 mL/min, 254 nm,  $R_t$  (major) = 30.0 min,  $R_t$  (minor) = 38.3 min; major isomer  $[\alpha]_D^{20} = -24.6$  ( $c$  0.90,  $\text{CHCl}_3$ ), lit.<sup>12</sup> (*S*)-1-(thiophen-2-yl)ethanol, 99% ee,  $[\alpha]_D^{24} = -26.0$  ( $c$  1.02,  $\text{CHCl}_3$ );  $^1\text{H}$  NMR ( $\text{CDCl}_3$ , 300 MHz)  $\delta$  7.26-7.21 (m, 1H), 6.98-6.94 (m, 2H), 5.09 (q,  $J = 6.6$  Hz, 1H), 2.61 (br s, 1H), 1.57 (d,  $J = 6.3$  Hz, 3H);  $^{13}\text{C}$  NMR ( $\text{CDCl}_3$ , 75 MHz)  $\delta$  150.0, 126.7, 124.5, 123.3, 66.2, 25.3.

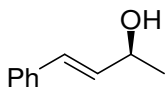

**(S)-4-Phenylbut-3(*E*)-en-2-ol (28).** 78% yield, 90% ee. HPLC analysis: Chiralcel OD column (250 mm × 4.6 mm), 10% *i*PrOH/hexane, 0.5 mL/min, 254 nm,  $R_t$  (major) = 22.8 min,  $R_t$  (minor) = 16.0 min; major isomer  $[\alpha]_D^{20} = -28.6$  ( $c$  1.4,  $\text{CHCl}_3$ ), lit.<sup>4</sup> (*S*)-4-phenylbut-3(*E*)-en-2-ol, 92% ee,  $[\alpha]_D^{25} = +16.4$  ( $c$  0.9,  $\text{CHCl}_3$ );  $^1\text{H}$  NMR ( $\text{CDCl}_3$ , 300 MHz)  $\delta$  7.40-7.22 (m, 5H), 6.57 (d,  $J = 15.9$  Hz, 1H), 6.27 (ddd,  $J = 15.9, 6.3, 0.9$  Hz, 1H), 4.87 (p,  $J = 6.3$  Hz, 1H), 2.12 (br s, 1H), 1.37 (d,  $J = 6.3$  Hz, 1H);  $^{13}\text{C}$  NMR ( $\text{CDCl}_3$ , 75 MHz)  $\delta$  136.8, 133.7, 129.5, 128.7 (2C), 127.7, 126.5 (2C), 69.0, 23.5.

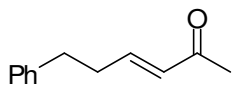

**6-Phenylhex-3(*E*)-en-2-one (29).**  $^1\text{H}$  NMR ( $\text{CDCl}_3$ , 300 MHz)  $\delta$  7.32-7.17 (m, 5H), 6.82 (dt,  $J = 16.2, 6.6$  Hz, 1H), 6.09 (d,  $J = 16.2$  Hz, 1H), 2.79 (t,  $J = 8.4$  Hz, 2H), 2.59-2.51 (m, 2H), 2.22 (s, 3H);  $^{13}\text{C}$  NMR ( $\text{CDCl}_3$ , 75 MHz)  $\delta$  198.6, 147.1, 140.7, 131.7, 128.6 (2C), 128.4 (2C), 126.3, 34.4, 34.1, 26.9; ES-MS  $[\text{MH}]^+ m/z$  175.1.

(12) Ohkuma, T.; Koizumi, M.; Yoshida, M.; Noyori, R. *Org. Lett.* **2000**, *2*, 1749–1751.

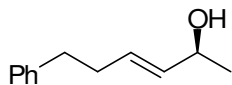

**(S)-6-Phenylhex-3(E)-en-2-ol (30).** 88% yield, 86% ee. HPLC analysis: Chiralcel OD column (250 mm × 4.6 mm), 5% *i*PrOH/hexane, 1.0 mL/min, 254 nm,  $R_t$  (major) = 20.5 min,  $R_t$  (minor) = 13.0 min; major isomer  $[\alpha]_D^{20} = -8.8$  (*c* 1.95,  $\text{CHCl}_3$ );  $^1\text{H NMR}$  ( $\text{CDCl}_3$ , 300 MHz)  $\delta$  7.32-7.19 (m, 5H), 5.68 (dt,  $J = 15.6, 6.5$  Hz, 1H), 5.53 (dd,  $J = 15.6, 6.3$  Hz, 1H), 4.26 (p,  $J = 6.3$  Hz, 1H), 2.71 (t,  $J = 7.5$  Hz, 2H), 2.35 (q,  $J = 7.5$  Hz, 2H), 1.68 (br s, 1H), 1.25 (d,  $J = 6.3$  Hz, 3H);  $^{13}\text{C NMR}$  ( $\text{CDCl}_3$ , 75 MHz)  $\delta$  141.9, 135.0, 130.2, 128.6 (2C), 128.5 (2C), 126.0, 69.1, 35.8, 34.1, 23.5; ES-MS  $[\text{MH}]^+ m/z$  177.1.

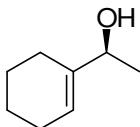

**(S)-1-Cyclohexenylethanol (32).** 82% yield, 97% ee. HPLC analysis: Chiralcel OB column (250 mm × 4.6 mm), 0.5% *i*PrOH/hexane, 0.5 mL/min, 202 nm,  $R_t$  (major) = 12.7 min,  $R_t$  (minor) = 16.0 min; major isomer  $[\alpha]_D^{20} = -9.5$  (*c* 1.2,  $\text{CHCl}_3$ ), lit.<sup>7</sup> (*S*)-1-cyclohexenylethanol, 91% ee,  $[\alpha]_D^{25} = -9.4$  (*c* 1.5,  $\text{CHCl}_3$ );  $^1\text{H NMR}$  ( $\text{CDCl}_3$ , 300 MHz)  $\delta$  5.67 (br s, 1H), 4.22-4.10 (m, 1H), 2.02-1.99 (m, 4H), 1.67-1.53 (m, 4H), 1.38 (d,  $J = 3.6$  Hz, 1H), 1.25 (d,  $J = 6.6$  Hz, 3H);  $^{13}\text{C NMR}$  ( $\text{CDCl}_3$ , 75 MHz)  $\delta$  141.4, 121.7, 72.4, 25.0, 23.8, 22.8, 22.7, 21.7.

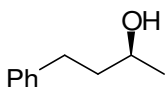

**(S)-4-Phenylbutan-2-ol (34).** 92% yield, 79% ee. HPLC analysis: Chiralcel OD column (250 mm × 4.6 mm), 10% *i*PrOH/hexane, 0.5 mL/min, 254 nm,  $R_t$  (major) = 15.5 min,  $R_t$  (minor) = 11.1 min; major isomer  $[\alpha]_D^{20} = +13.8$  (*c* 1.70,  $\text{CHCl}_3$ ), lit.<sup>4</sup> (*R*)-4-phenylbutan-2-ol, 88% ee,  $[\alpha]_D^{22} = -17.32$  (*c* 1.6,  $\text{CHCl}_3$ );  $^1\text{H NMR}$  ( $\text{CDCl}_3$ , 300 MHz)  $\delta$  7.34-7.18 (m, 5H), 3.89-3.80 (m, 1H), 2.83-2.64 (m, 2H), 1.89 (br s, 1H), 1.86-1.75 (m, 2H), 1.25 (d,  $J = 6.0$  Hz, 3H);  $^{13}\text{C NMR}$  ( $\text{CDCl}_3$ , 75 MHz)  $\delta$  142.2, 128.5 (4C), 125.9, 67.5, 40.9, 32.2, 23.6.



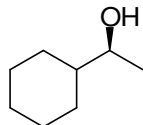

**(S)-1-Cyclohexylethanol (36).** 68% yield, 91% ee. HPLC analysis of 4-nitrobenzoate: Chiralcel OJ-H column (250 mm × 4.6 mm), 0.1% *i*PrOH/hexane, 0.4 mL/min, 254 nm,  $R_t$  (major) = 31.9 min,  $R_t$  (minor) = 35.0 min); major isomer  $[\alpha]_D^{20} = +3.71$  (*c* 0.70, CHCl<sub>3</sub>), lit.<sup>13</sup> (*R*)-1-cyclohexylethanol, 67% ee,  $[\alpha]_D = -1.90$  (*c* 0.75, CHCl<sub>3</sub>); <sup>1</sup>H NMR (CDCl<sub>3</sub>, 300 MHz)  $\delta$  3.52 (p, *J* = 6.3 Hz, 1H), 1.85-1.63 (m, 5H), 1.52 (br s, 1H), 1.35-0.85 (m, 6H), 1.13 (d, *J* = 6.3 Hz, 3H); <sup>13</sup>C NMR (CDCl<sub>3</sub>, 75 MHz)  $\delta$  72.3, 45.2, 28.8, 28.5, 26.6, 26.3, 26.2, 20.5.

---

(13) Gamble, M. P.; Smith, A. R. C.; Wills, M. *J. Org. Chem.* **1998**, *63*, 6068–6071.

## V. Chiral HPLC analyses

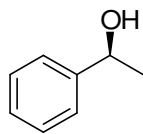

### (S)-1-Phenylethanol (2)

[Chiralcel OD column (250 mm × 4.6 mm), 2% *i*PrOH/hexane, 1.0 mL/min, 254 nm]

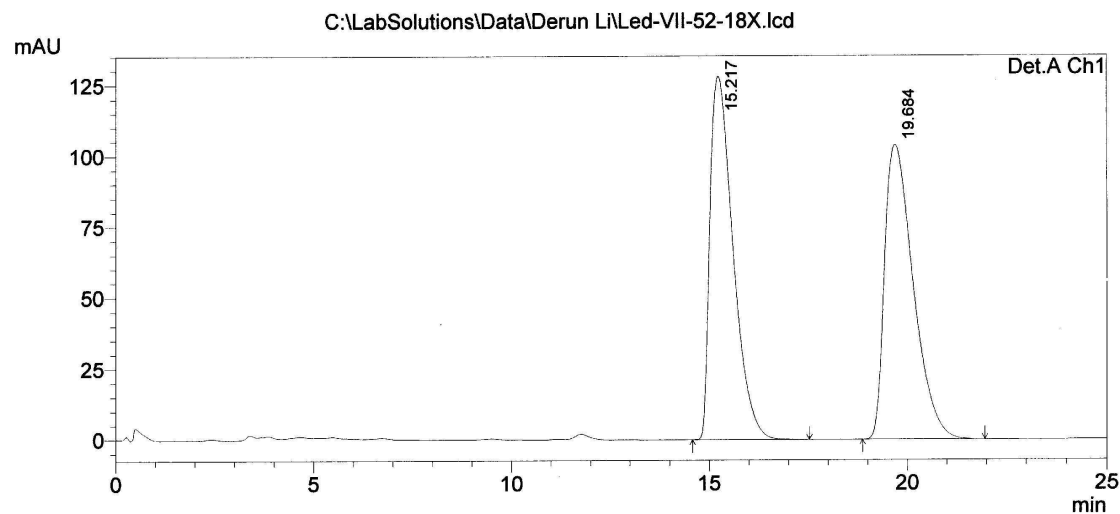

PeakTable

| Peak# | Ret. Time | Area     | Height | Area %  | Height % |
|-------|-----------|----------|--------|---------|----------|
| 1     | 15.217    | 5195482  | 128317 | 49.887  | 55.218   |
| 2     | 19.684    | 5219004  | 104065 | 50.113  | 44.782   |
| Total |           | 10414486 | 232382 | 100.000 | 100.000  |

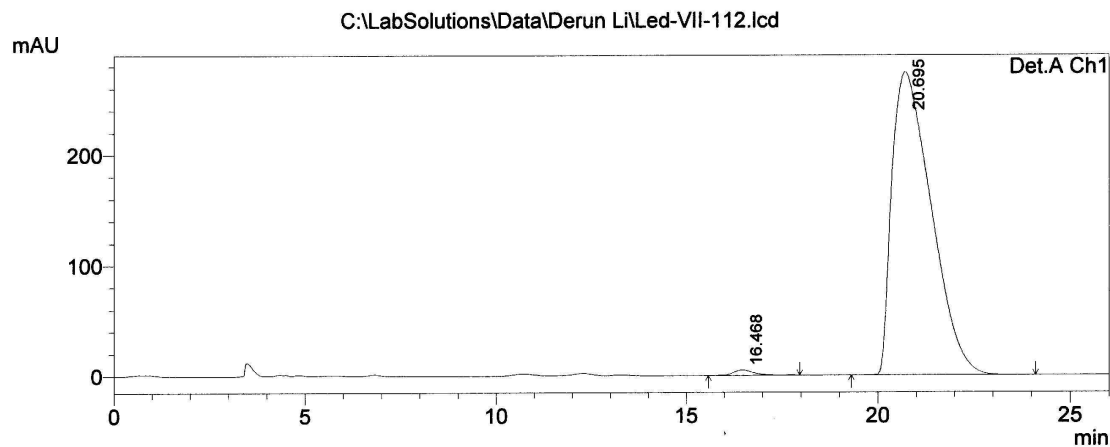

PeakTable

| Peak# | Ret. Time | Area     | Height | Area %  | Height % |
|-------|-----------|----------|--------|---------|----------|
| 1     | 16.468    | 175384   | 4913   | 0.888   | 1.760    |
| 2     | 20.695    | 19582790 | 274225 | 99.112  | 98.240   |
| Total |           | 19758174 | 279138 | 100.000 | 100.000  |

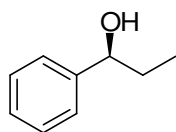

**(S)-1-Phenylpropan-1-ol (4)**

[Chiralcel OD column (250 mm × 4.6 mm), 2% *i*PrOH/hexane, 1.0 mL/min, 254 nm]

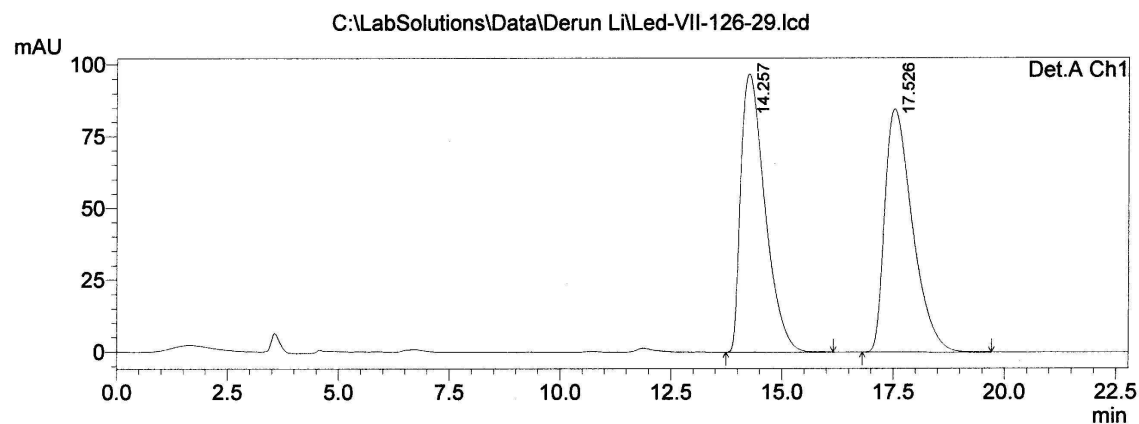

PeakTable

| Peak# | Ret. Time | Area    | Height | Area %  | Height % |
|-------|-----------|---------|--------|---------|----------|
| 1     | 14.257    | 3663280 | 96891  | 49.987  | 53.365   |
| 2     | 17.526    | 3665159 | 84671  | 50.013  | 46.635   |
| Total |           | 7328440 | 181561 | 100.000 | 100.000  |

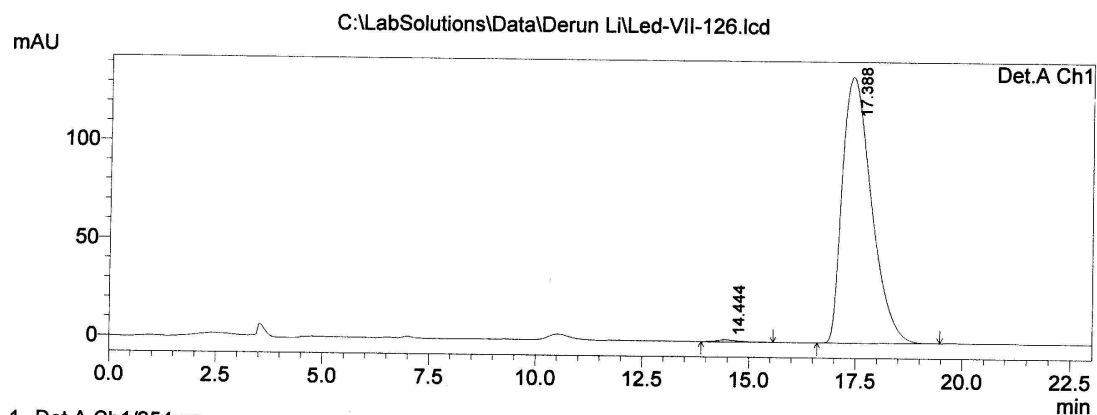

1 Det.A Ch1/254nm

PeakTable

| Peak# | Ret. Time | Area    | Height | Area %  | Height % |
|-------|-----------|---------|--------|---------|----------|
| 1     | 14.444    | 32400   | 1026   | 0.501   | 0.752    |
| 2     | 17.388    | 6438129 | 135380 | 99.499  | 99.248   |
| Total |           | 6470530 | 136406 | 100.000 | 100.000  |

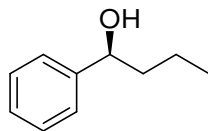

**(S)-1-Phenylbutan-1-ol (6)**

[Chiralcel OD column (250 mm × 4.6 mm), 1% *i*PrOH/hexane, 1.0 mL/min, 254 nm]

C:\LabSolutions\Data\Derun Li\Led-VII-141-29OD991A.lcd

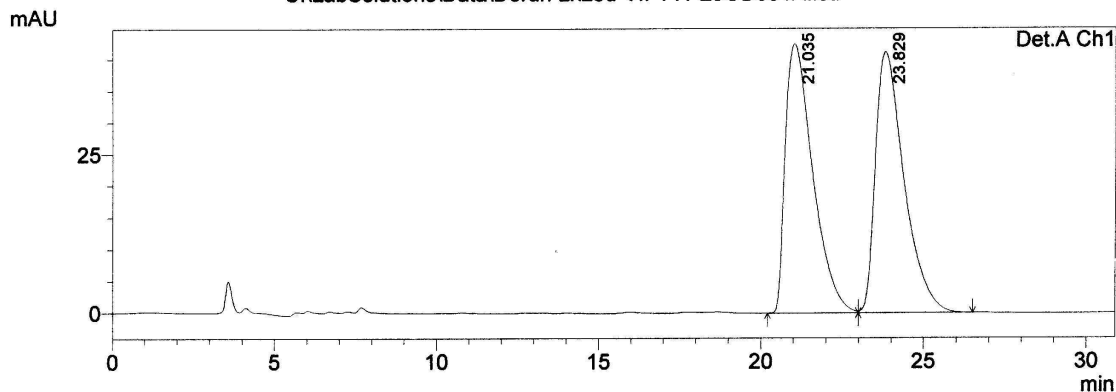

PeakTable

Detector A Ch1 254nm

| Peak# | Ret. Time | Area    | Height | Area %  | Height % |
|-------|-----------|---------|--------|---------|----------|
| 1     | 21.035    | 2502206 | 42447  | 49.845  | 50.752   |
| 2     | 23.829    | 2517729 | 41190  | 50.155  | 49.248   |
| Total |           | 5019935 | 83637  | 100.000 | 100.000  |

C:\LabSolutions\Data\Derun Li\Led-VII-141od991a.lcd

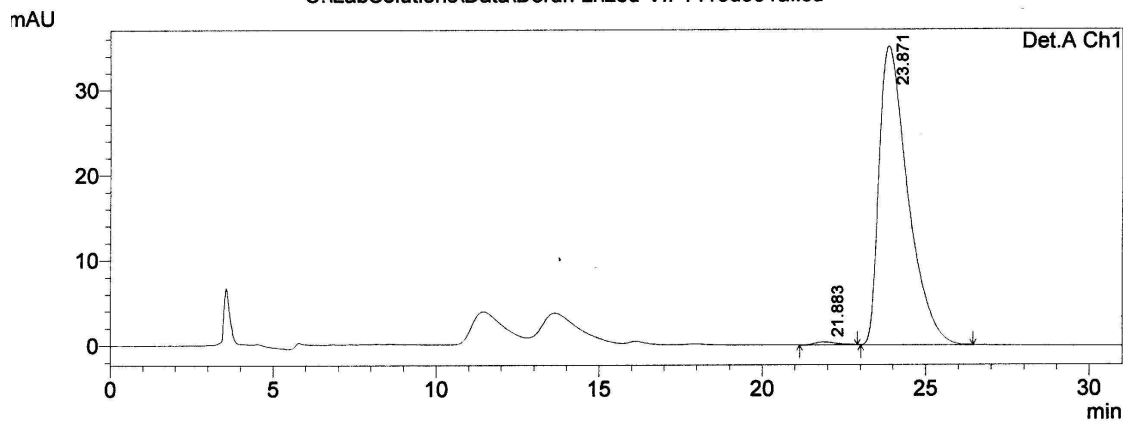

PeakTable

Detector A Ch1 254nm

| Peak# | Ret. Time | Area    | Height | Area %  | Height % |
|-------|-----------|---------|--------|---------|----------|
| 1     | 21.883    | 15556   | 358    | 0.719   | 1.011    |
| 2     | 23.871    | 2147085 | 35083  | 99.281  | 98.989   |
| Total |           | 2162641 | 35442  | 100.000 | 100.000  |

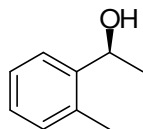

**(S)-1-o-Tolyethanol (8)**

[Chiralpak AD column (250 mm × 4.6 mm), 2% *i*PrOH/hexane, 0.5 mL/min, 254 nm]

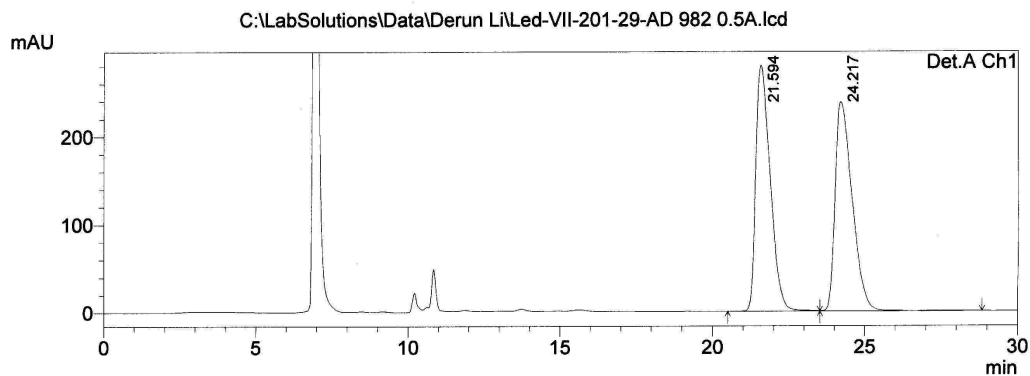

PeakTable

Detector A Ch1 245nm

| Peak# | Ret. Time | Area     | Height | Area %  | Height % |
|-------|-----------|----------|--------|---------|----------|
| 1     | 21.594    | 9263298  | 279274 | 49.986  | 54.041   |
| 2     | 24.217    | 9268335  | 237510 | 50.014  | 45.959   |
| Total |           | 18531633 | 516784 | 100.000 | 100.000  |

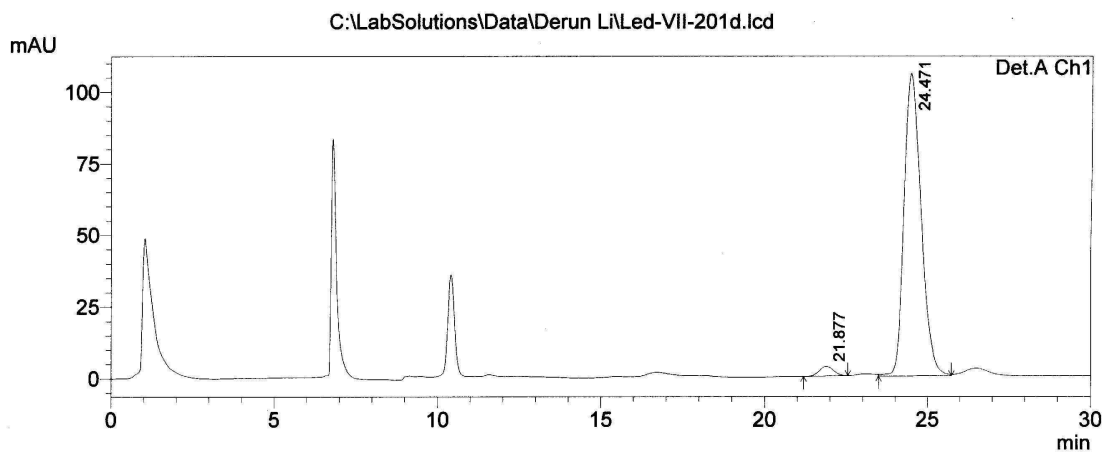

PeakTable

Detector A Ch1 245nm

| Peak# | Ret. Time | Area    | Height | Area %  | Height % |
|-------|-----------|---------|--------|---------|----------|
| 1     | 21.877    | 103001  | 3384   | 2.597   | 3.105    |
| 2     | 24.471    | 3863280 | 105604 | 97.403  | 96.895   |
| Total |           | 3966282 | 108988 | 100.000 | 100.000  |

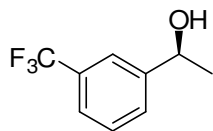

**(S)-1-(3-(Trifluoromethyl)phenyl)ethanol (10)**

[Chiralcel OD column (250 mm × 4.6 mm), 2% *i*PrOH/hexane, 1.0 mL/min, 254 nm]

C:\LabSolutions\Data\Derun Li\Led-VII-131-29A.lcd

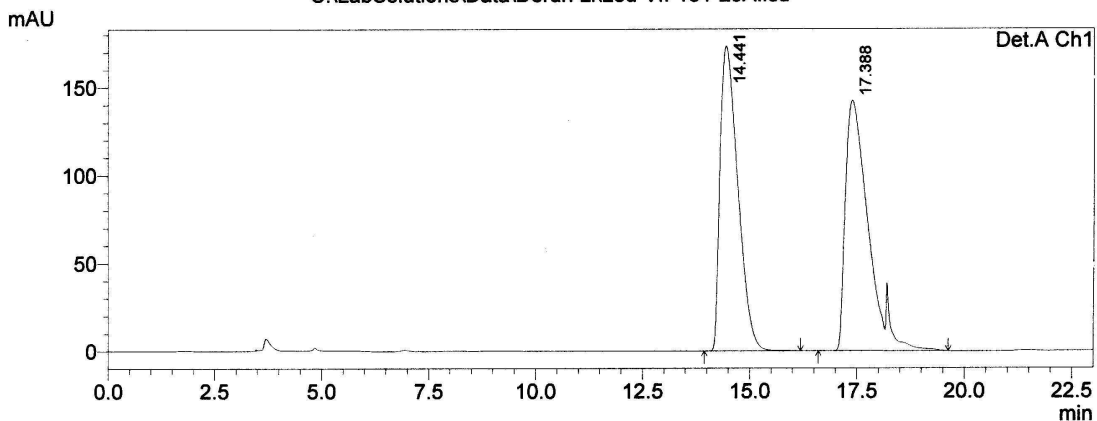

1 Det.A Ch1/254nm

PeakTable

Detector A Ch1 254nm

| Peak# | Ret. Time | Area     | Height | Area %  | Height % |
|-------|-----------|----------|--------|---------|----------|
| 1     | 14.441    | 5024407  | 173407 | 48.499  | 54.921   |
| 2     | 17.388    | 5335511  | 142332 | 51.501  | 45.079   |
| Total |           | 10359918 | 315739 | 100.000 | 100.000  |

C:\LabSolutions\Data\Derun Li\Led-VII-138A.lcd

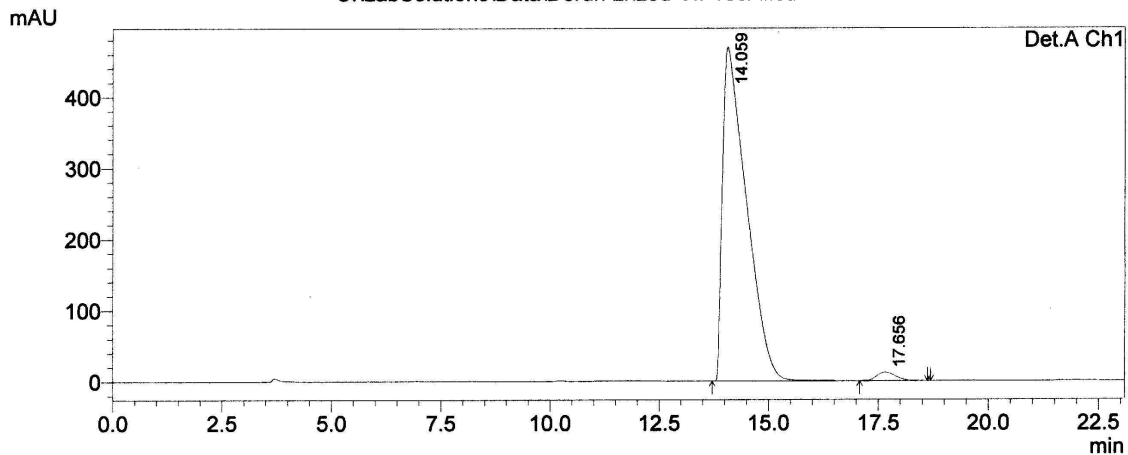

PeakTable

Detector A Ch1 254nm

| Peak# | Ret. Time | Area     | Height | Area %  | Height % |
|-------|-----------|----------|--------|---------|----------|
| 1     | 14.059    | 17841692 | 469701 | 98.027  | 97.510   |
| 2     | 17.656    | 359153   | 11992  | 1.973   | 2.490    |
| Total |           | 18200845 | 481694 | 100.000 | 100.000  |

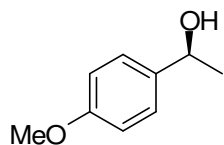

**(S)-1-(4-Methoxyphenyl)ethanol (12)**

[Chiralcel OB column (250 mm × 4.6 mm), 10% *i*PrOH/hexane, 0.5 mL/min, 254 nm]

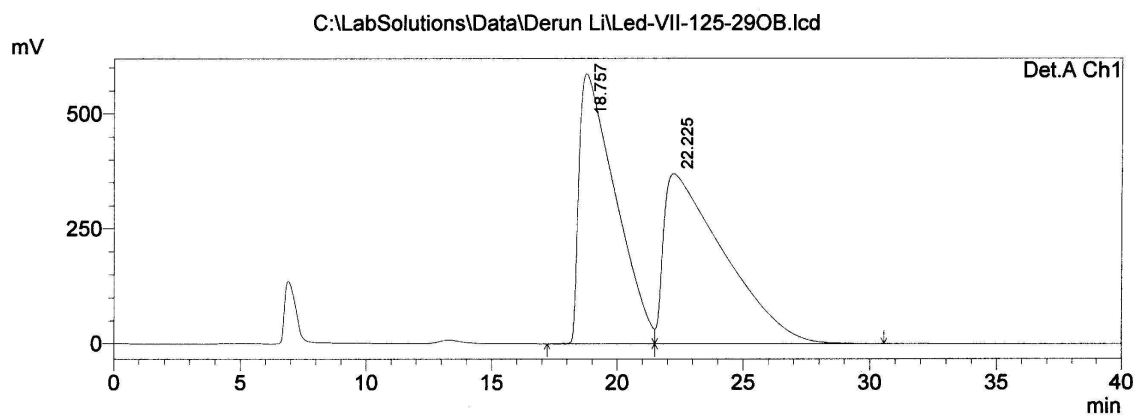

PeakTable

Detector A Ch1 254nm

| Peak# | Ret. Time | Area      | Height | Area %  | Height % |
|-------|-----------|-----------|--------|---------|----------|
| 1     | 18.757    | 58901696  | 587336 | 48.893  | 61.400   |
| 2     | 22.225    | 61568771  | 369231 | 51.107  | 38.600   |
| Total |           | 120470468 | 956567 | 100.000 | 100.000  |

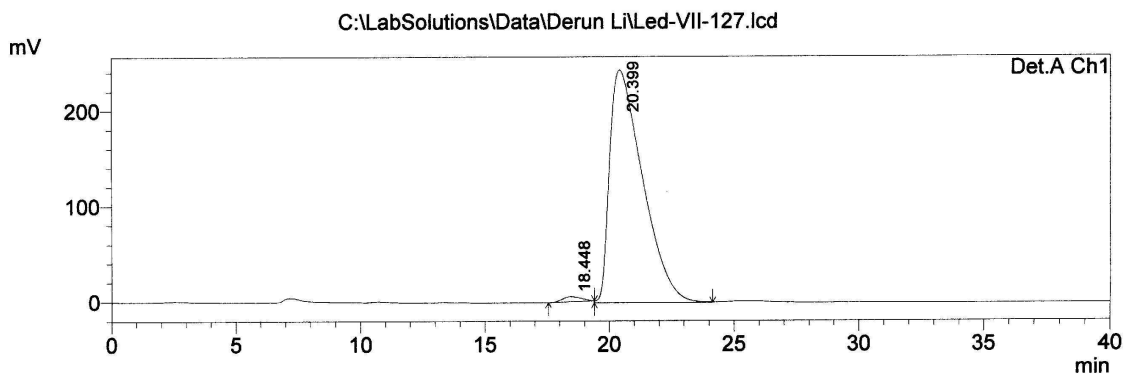

PeakTable

Detector A Ch1 254nm

| Peak# | Ret. Time | Area     | Height | Area %  | Height % |
|-------|-----------|----------|--------|---------|----------|
| 1     | 18.448    | 279574   | 5313   | 1.230   | 2.135    |
| 2     | 20.399    | 22451339 | 243501 | 98.770  | 97.865   |
| Total |           | 22730914 | 248814 | 100.000 | 100.000  |

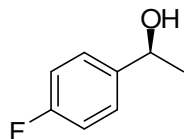

**(S)-1-(4-Fluorophenyl)ethanol (14)**

[Chiralcel OB column (250 mm × 4.6 mm), 1% *i*PrOH/hexane, 0.6 mL/min, 254 nm]

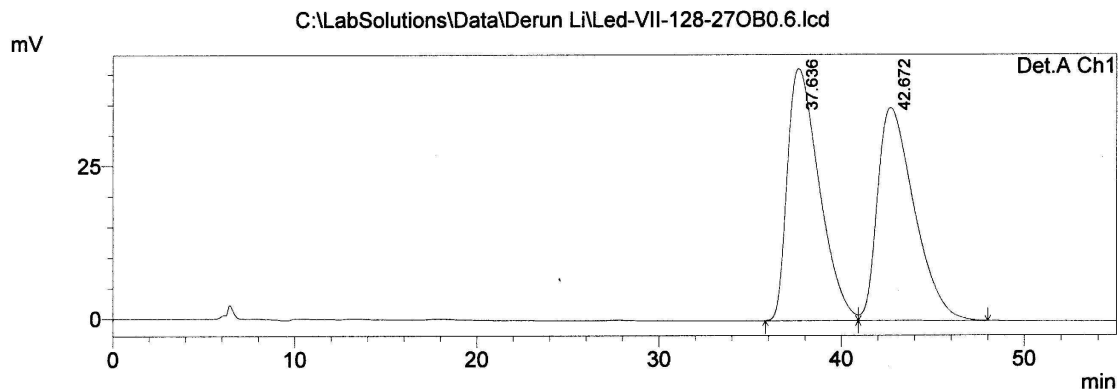

PeakTable

| Peak# | Ret. Time | Area    | Height | Area %  | Height % |
|-------|-----------|---------|--------|---------|----------|
| 1     | 37.636    | 5012167 | 41185  | 50.687  | 54.167   |
| 2     | 42.672    | 4876271 | 34848  | 49.313  | 45.833   |
| Total |           | 9888439 | 76033  | 100.000 | 100.000  |

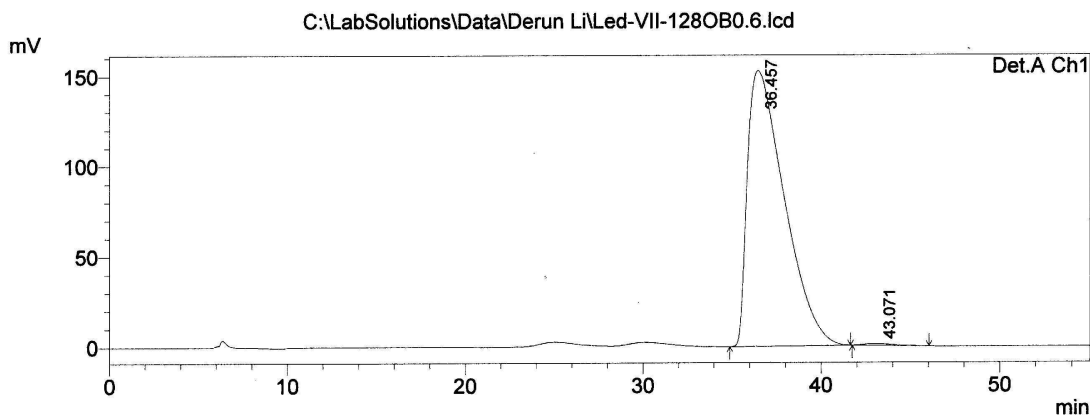

1 Det.A Ch1/254nm

PeakTable

| Peak# | Ret. Time | Area     | Height | Area %  | Height % |
|-------|-----------|----------|--------|---------|----------|
| 1     | 36.457    | 21935304 | 152759 | 99.530  | 99.336   |
| 2     | 43.071    | 103686   | 1021   | 0.470   | 0.664    |
| Total |           | 22038989 | 153781 | 100.000 | 100.000  |



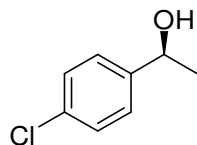

**(S)-1-(4-Chlorophenyl)ethanol (16)**

[Chiralcel OB column (250 mm × 4.6 mm), hexane/EtOH (60:1), 0.5 mL/min, 254 nm]

C:\LabSolutions\Data\Derun Li\Led-VII-158-29ob601.lcd

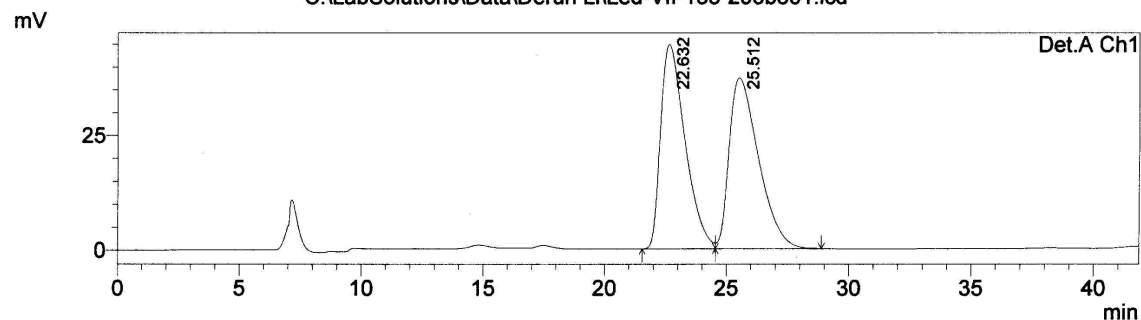

PeakTable

Detector A Ch1 254nm

| Peak# | Ret. Time | Area    | Height | Area %  | Height % |
|-------|-----------|---------|--------|---------|----------|
| 1     | 22.632    | 3112787 | 44596  | 49.903  | 54.482   |
| 2     | 25.512    | 3124831 | 37258  | 50.097  | 45.518   |
| Total |           | 6237618 | 81854  | 100.000 | 100.000  |

C:\LabSolutions\Data\Derun Li\Led-VII-159A.lcd

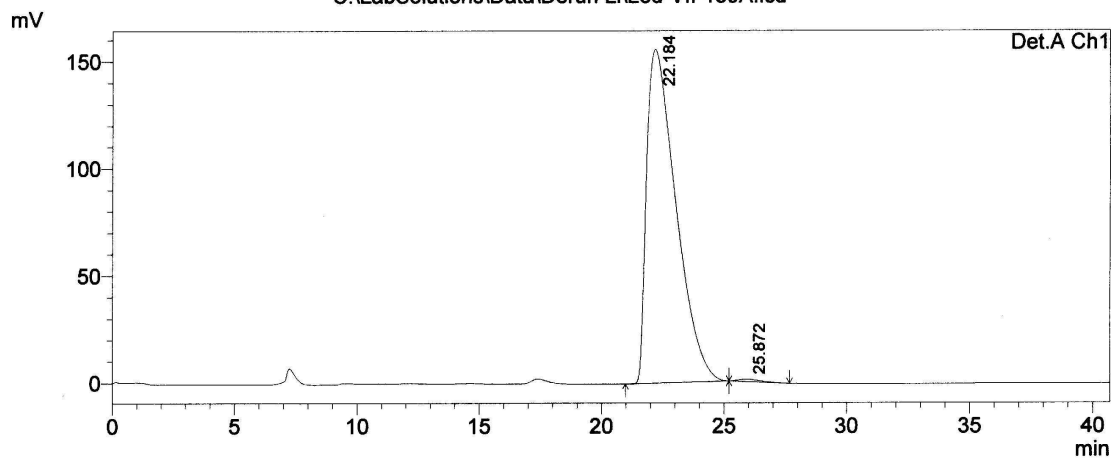

PeakTable

Detector A Ch1 254nm

| Peak# | Ret. Time | Area     | Height | Area %  | Height % |
|-------|-----------|----------|--------|---------|----------|
| 1     | 22.184    | 12950920 | 155583 | 99.494  | 99.328   |
| 2     | 25.872    | 65834    | 1052   | 0.506   | 0.672    |
| Total |           | 13016754 | 156636 | 100.000 | 100.000  |

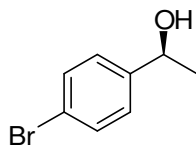

**(S)-1-(4-Bromophenyl)ethanol (18)**

[Chiralcel OB column (250 mm × 4.6 mm), hexane/EtOH (60:1), 0.5 mL/min, 254 nm]

C:\LabSolutions\Data\Derun Li\Led-VII-161-29-OB601.lcd

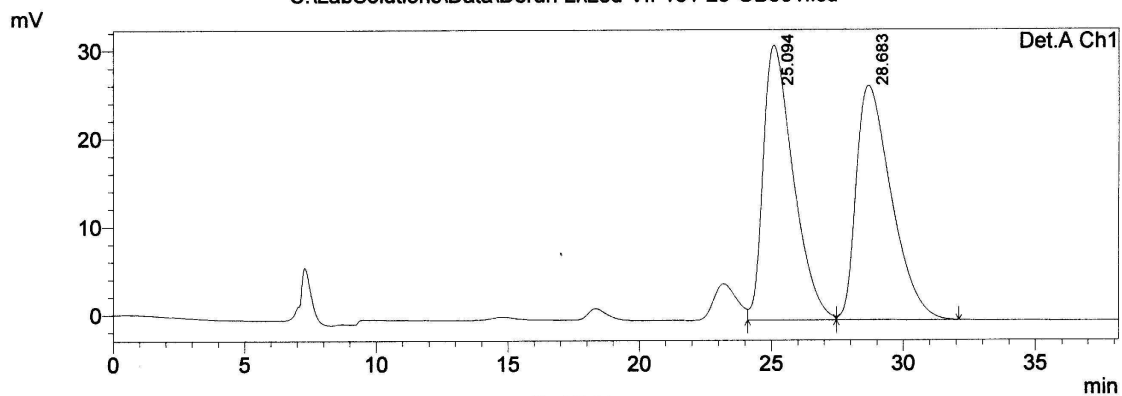

Detector A Ch1 254nm

| Peak# | Ret. Time | Area    | Height | Area %  | Height % |
|-------|-----------|---------|--------|---------|----------|
| 1     | 25.094    | 2478207 | 31209  | 50.075  | 53.949   |
| 2     | 28.683    | 2470749 | 26639  | 49.925  | 46.051   |
| Total |           | 4948956 | 57848  | 100.000 | 100.000  |

C:\LabSolutions\Data\Derun Li\Led-VII-161.lcd

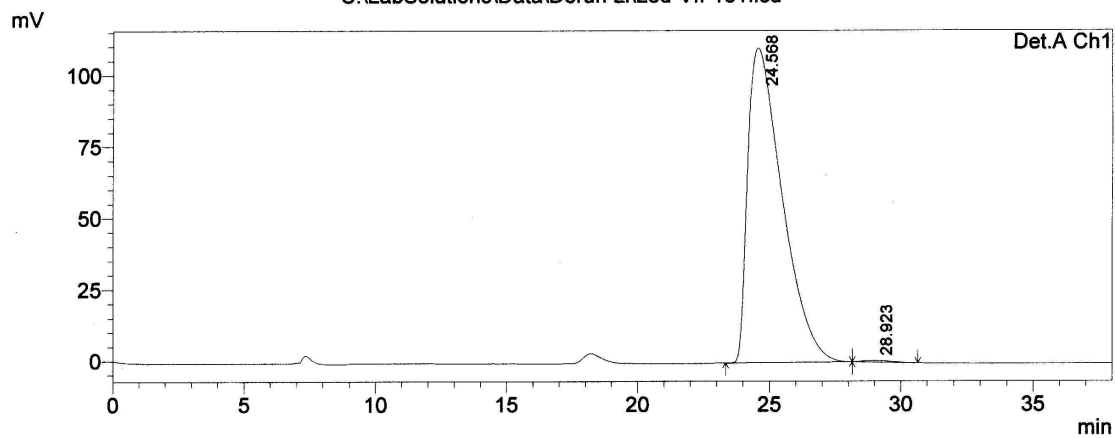

1 Det.A Ch1/254nm

PeakTable

Detector A Ch1 254nm

| Peak# | Ret. Time | Area     | Height | Area %  | Height % |
|-------|-----------|----------|--------|---------|----------|
| 1     | 24.568    | 10029031 | 110179 | 99.591  | 99.486   |
| 2     | 28.923    | 41200    | 569    | 0.409   | 0.514    |
| Total |           | 10070230 | 110749 | 100.000 | 100.000  |

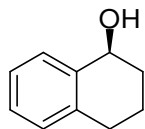

**(S)-1,2,3,4-Tetrahydronaphthalen-1-ol (20)**

[Chiralcel OD column (250 mm × 4.6 mm), 2% *i*PrOH/hexane, 1.0 mL/min, 254 nm]

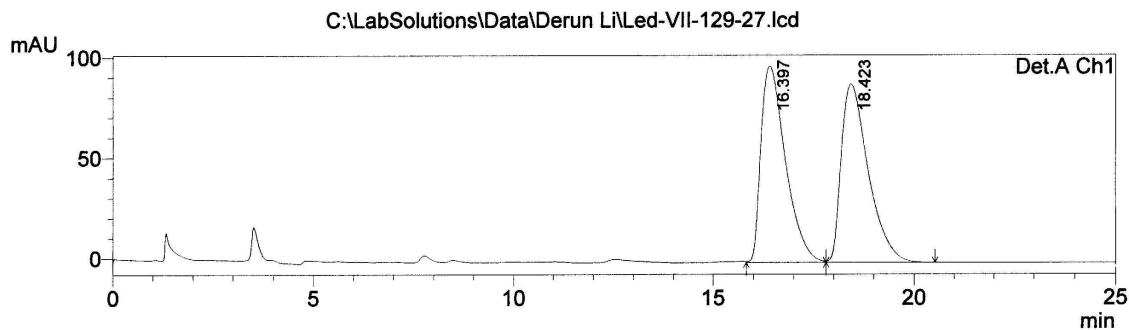

PeakTable

| Peak# | Ret. Time | Area    | Height | Area %  | Height % |
|-------|-----------|---------|--------|---------|----------|
| 1     | 16.397    | 4169825 | 97648  | 50.025  | 52.388   |
| 2     | 18.423    | 4165710 | 88747  | 49.975  | 47.612   |
| Total |           | 8335535 | 186395 | 100.000 | 100.000  |

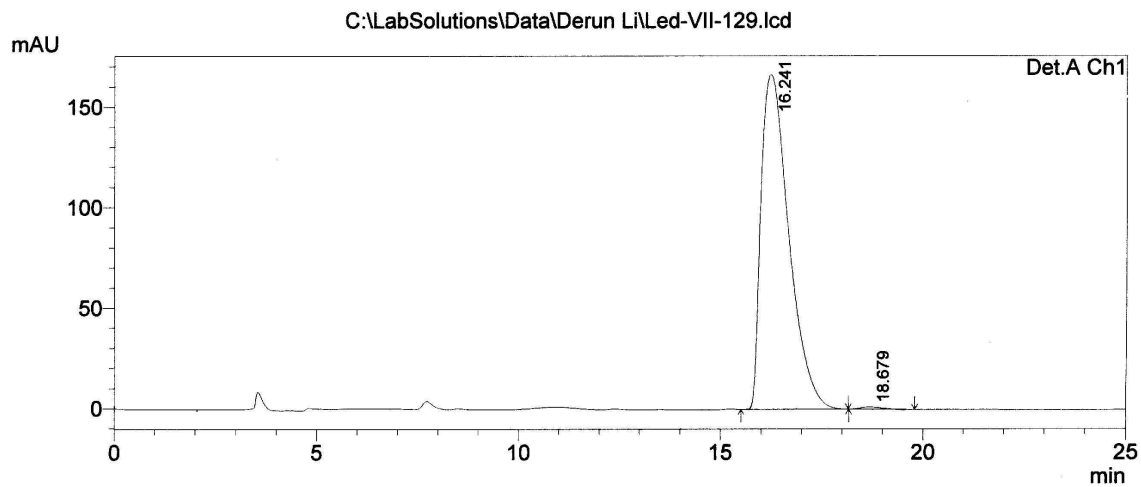

PeakTable

| Peak# | Ret. Time | Area    | Height | Area %  | Height % |
|-------|-----------|---------|--------|---------|----------|
| 1     | 16.241    | 7963948 | 166589 | 99.443  | 99.305   |
| 2     | 18.679    | 44593   | 1165   | 0.557   | 0.695    |
| Total |           | 8008541 | 167754 | 100.000 | 100.000  |

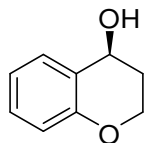

**(S)-Chroman-4-ol (22)**

[Chiralcel OJ-H column (250 mm × 4.6 mm), 5% *i*PrOH/hexane, 1.0 mL/min, 254 nm]

C:\LabSolutions\Data\Derun Li\Led-VII-140-290JHA.lcd

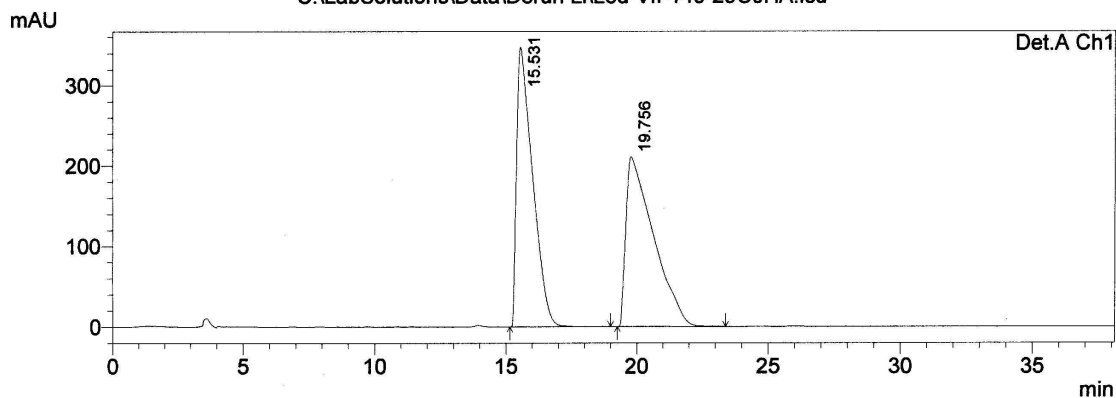

PeakTable

Detector A Ch1 254nm

| Peak# | Ret. Time | Area     | Height | Area %  | Height % |
|-------|-----------|----------|--------|---------|----------|
| 1     | 15.531    | 14775439 | 347688 | 48.862  | 62.245   |
| 2     | 19.756    | 15463959 | 210895 | 51.138  | 37.755   |
| Total |           | 30239399 | 558583 | 100.000 | 100.000  |

C:\LabSolutions\Data\Derun Li\Led-VII-140.lcd

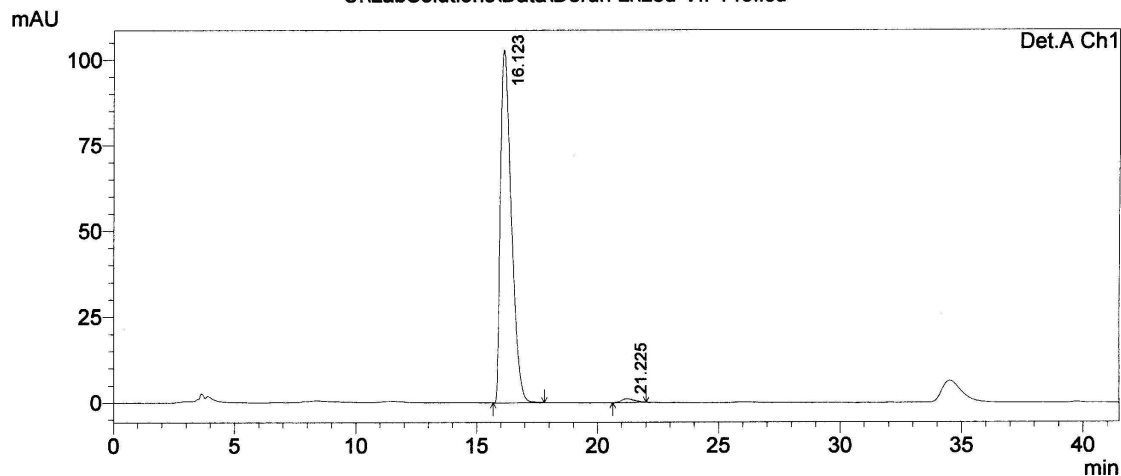

PeakTable

Detector A Ch1 254nm

| Peak# | Ret. Time | Area    | Height | Area %  | Height % |
|-------|-----------|---------|--------|---------|----------|
| 1     | 16.123    | 3230933 | 102963 | 98.773  | 98.918   |
| 2     | 21.225    | 40140   | 1126   | 1.227   | 1.082    |
| Total |           | 3271073 | 104090 | 100.000 | 100.000  |

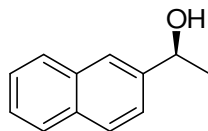

**(S)-1-(Naphthalen-2-yl)ethanol (24)**

[Chiralcel OJ-H column (250 mm × 4.6 mm), 5% *i*PrOH/hexane, 1.0 mL/min, 254 nm]

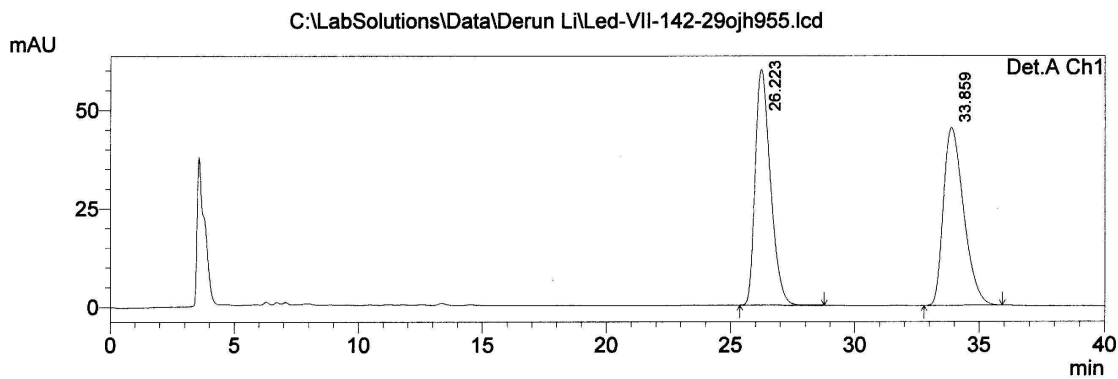

PeakTable

Detector A Ch1 254nm

| Peak# | Ret. Time | Area    | Height | Area %  | Height % |
|-------|-----------|---------|--------|---------|----------|
| 1     | 26.223    | 2552584 | 59862  | 49.960  | 57.015   |
| 2     | 33.859    | 2556668 | 45131  | 50.040  | 42.985   |
| Total |           | 5109252 | 104993 | 100.000 | 100.000  |

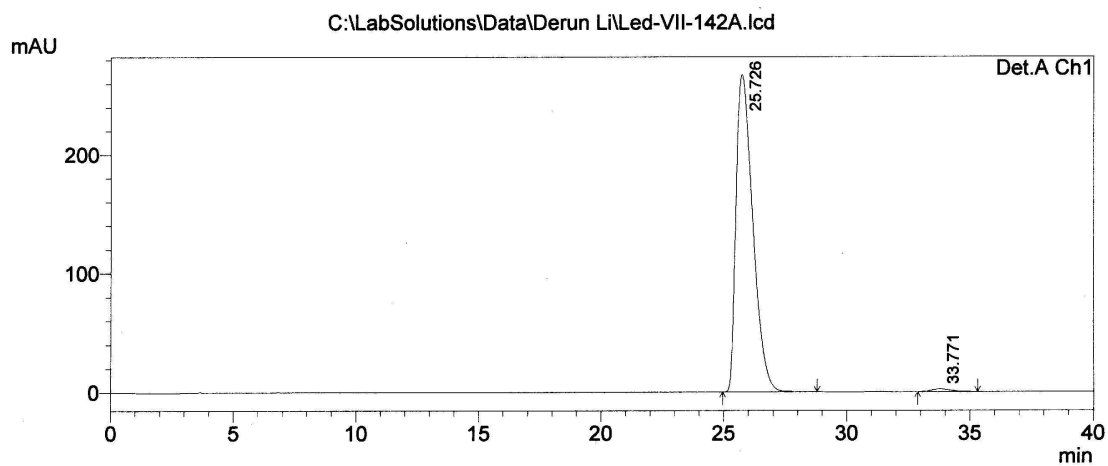

1 Det.A Ch1/254nm

PeakTable

Detector A Ch1 254nm

| Peak# | Ret. Time | Area     | Height | Area %  | Height % |
|-------|-----------|----------|--------|---------|----------|
| 1     | 25.726    | 12702118 | 267391 | 99.085  | 99.166   |
| 2     | 33.771    | 117315   | 2250   | 0.915   | 0.834    |
| Total |           | 12819433 | 269641 | 100.000 | 100.000  |

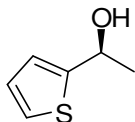

**(S)-1-(Thiophen-2-yl)ethanol (26)**

[Chiralcel OD column (250 mm × 4.6 mm), 2% *i*PrOH/hexane, 1.0 mL/min, 254 nm]

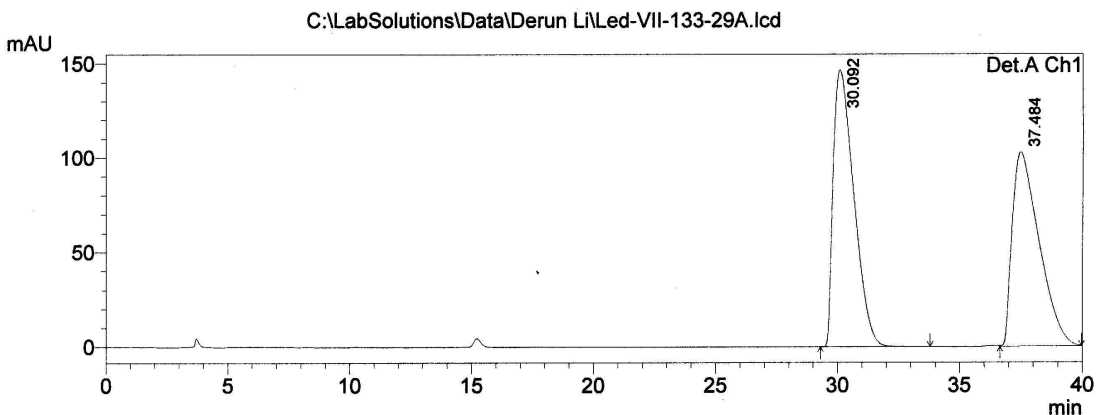

PeakTable

| Peak# | Ret. Time | Area     | Height | Area %  | Height % |
|-------|-----------|----------|--------|---------|----------|
| 1     | 30.092    | 8637146  | 146707 | 52.589  | 58.809   |
| 2     | 37.484    | 7786764  | 102755 | 47.411  | 41.191   |
| Total |           | 16423910 | 249462 | 100.000 | 100.000  |

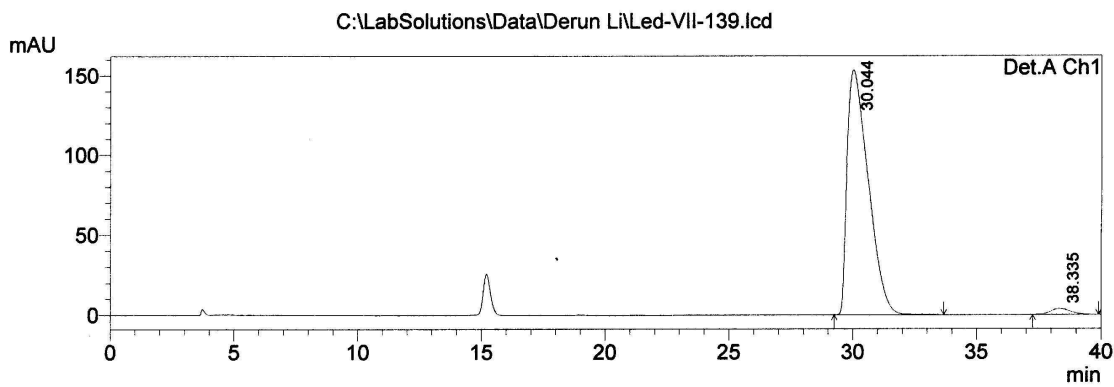

PeakTable

| Peak# | Ret. Time | Area    | Height | Area %  | Height % |
|-------|-----------|---------|--------|---------|----------|
| 1     | 30.044    | 9106451 | 153540 | 97.761  | 97.574   |
| 2     | 38.335    | 208539  | 3818   | 2.239   | 2.426    |
| Total |           | 9314989 | 157357 | 100.000 | 100.000  |

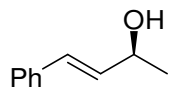

**(S)-4-Phenylbut-3(E)-en-2-ol (28)**

[Chiralcel OD column (250 mm × 4.6 mm), 10% *i*PrOH/hexane, 0.5 mL/min, 254 nm]

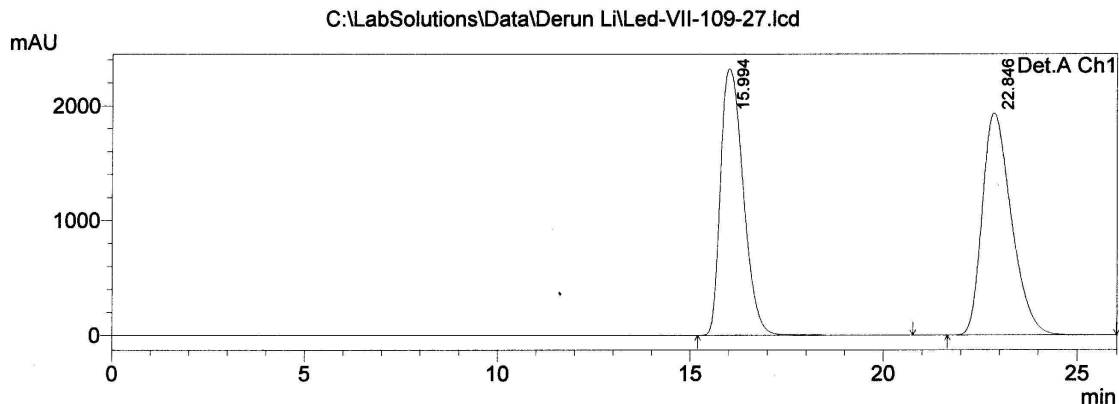

PeakTable

Detector A Ch1 254nm

| Peak# | Ret. Time | Area      | Height  | Area %  | Height % |
|-------|-----------|-----------|---------|---------|----------|
| 1     | 15.994    | 95021379  | 2317777 | 48.402  | 54.523   |
| 2     | 22.846    | 101294977 | 1933241 | 51.598  | 45.477   |
| Total |           | 196316355 | 4251018 | 100.000 | 100.000  |

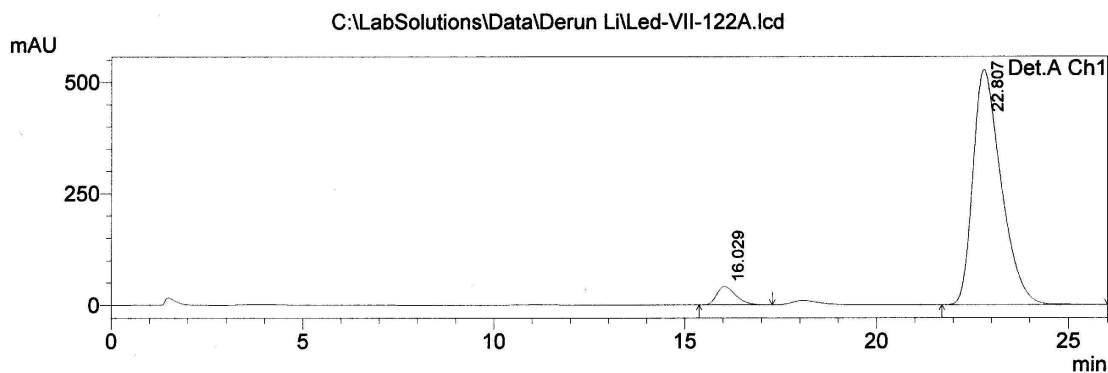

PeakTable

Detector A Ch1 254nm

| Peak# | Ret. Time | Area     | Height | Area %  | Height % |
|-------|-----------|----------|--------|---------|----------|
| 1     | 16.029    | 1430847  | 41278  | 5.054   | 7.250    |
| 2     | 22.807    | 26881031 | 528072 | 94.946  | 92.750   |
| Total |           | 28311878 | 569350 | 100.000 | 100.000  |

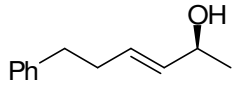

**(S)-6-Phenylhex-3(E)-en-2-ol (30)**

[Chiralcel OD column (250 mm × 4.6 mm), 5% *i*PrOH/hexane, 1.0 mL/min, 254 nm]

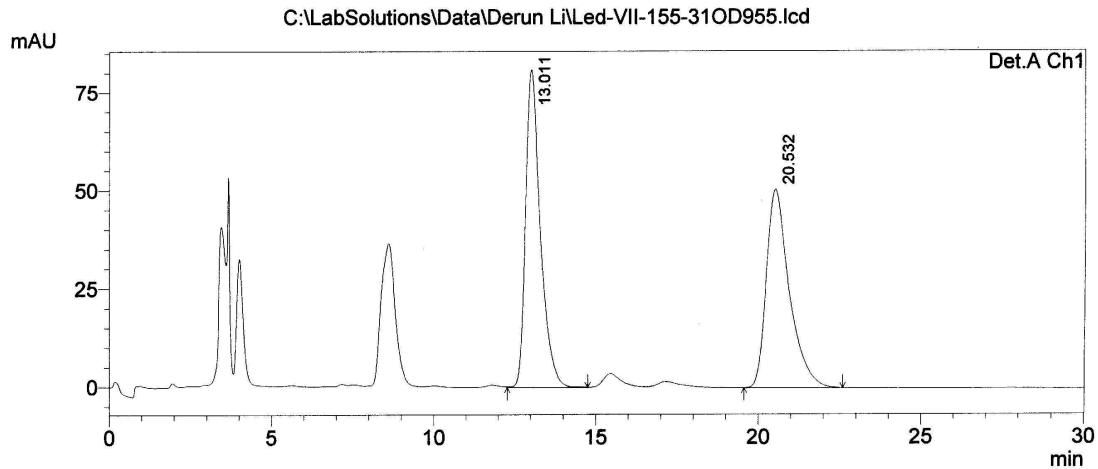

1 Det.A Ch1/254nm

PeakTable

Detector A Ch1 254nm

| Peak# | Ret. Time | Area    | Height | Area %  | Height % |
|-------|-----------|---------|--------|---------|----------|
| 1     | 13.011    | 2559620 | 80983  | 50.768  | 61.555   |
| 2     | 20.532    | 2482162 | 50580  | 49.232  | 38.445   |
| Total |           | 5041781 | 131563 | 100.000 | 100.000  |

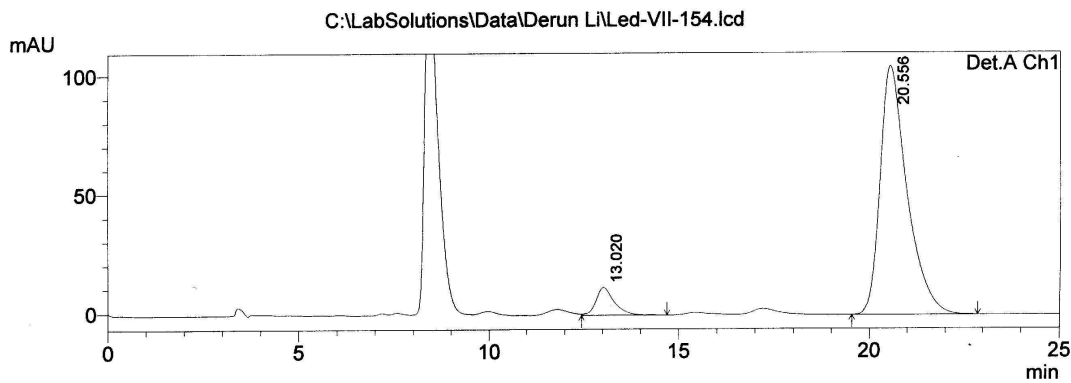

1 Det.A Ch1/254nm

PeakTable

Detector A Ch1 254nm

| Peak# | Ret. Time | Area    | Height | Area %  | Height % |
|-------|-----------|---------|--------|---------|----------|
| 1     | 13.020    | 382399  | 11539  | 6.915   | 9.937    |
| 2     | 20.556    | 5147705 | 104585 | 93.085  | 90.063   |
| Total |           | 5530104 | 116125 | 100.000 | 100.000  |



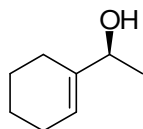

**(S)-1-Cyclohexenylethanol (32)**

[Chiralcel OB column (250 mm × 4.6 mm), 0.5% *i*PrOH/hexane, 0.5 mL/min, 202 nm]

C:\LabSolutions\Data\Derun Li\Led-VII-162-25OB995A.lcd

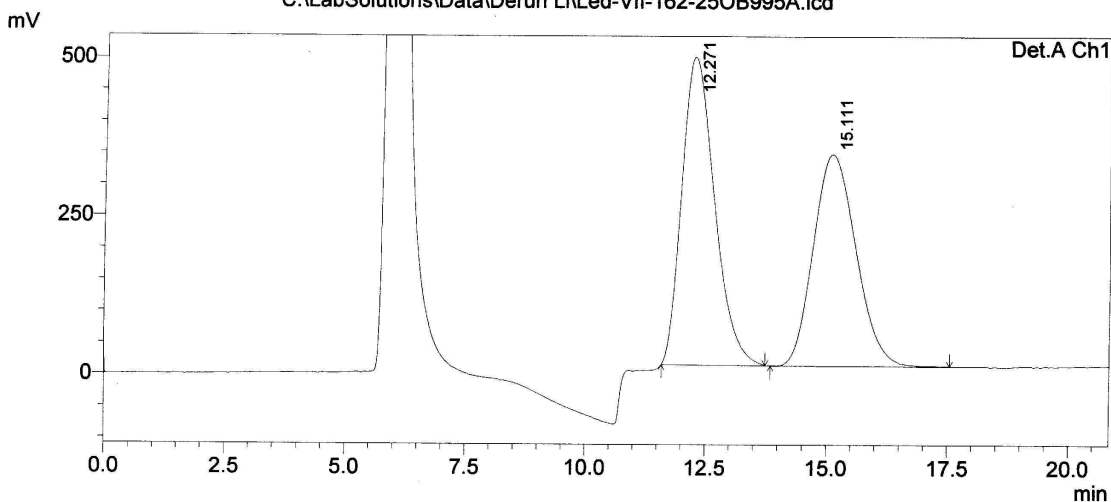

1 Det.A Ch1/202nm

| Peak# | Ret. Time | Area     | Height | Area %  |
|-------|-----------|----------|--------|---------|
| 1     | 12.271    | 23025141 | 486438 | 52.962  |
| 2     | 15.111    | 20449762 | 334456 | 47.038  |
| Total |           | 43474904 | 820894 | 100.000 |

C:\LabSolutions\Data\Derun Li\Led-VIII-31-13.lcd

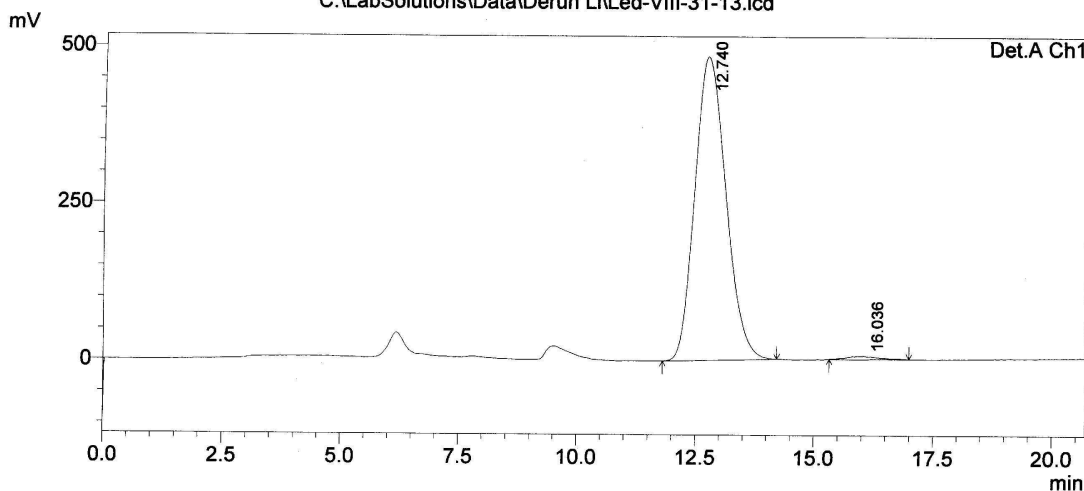

1 Det.A Ch1/202nm

PeakTable

| Peak# | Ret. Time | Area     | Height | Area %  |
|-------|-----------|----------|--------|---------|
| 1     | 12.740    | 22007040 | 483626 | 98.860  |
| 2     | 16.036    | 253845   | 5611   | 1.140   |
| Total |           | 22260885 | 489237 | 100.000 |

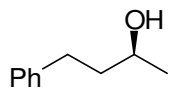

**(S)-4-Phenylbutan-2-ol (34)**

[Chiralcel OD column (250 mm × 4.6 mm), 10% *i*PrOH/hexane, 0.5 mL/min, 254 nm]

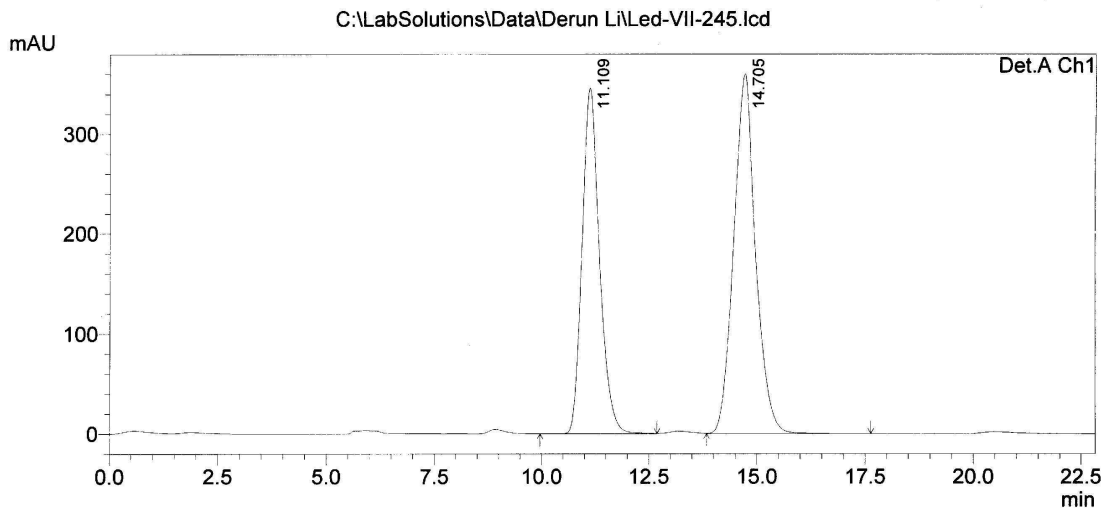

PeakTable

| Peak# | Ret. Time | Area     | Height | Area %  | Height % |
|-------|-----------|----------|--------|---------|----------|
| 1     | 11.109    | 9759084  | 346012 | 43.554  | 49.022   |
| 2     | 14.705    | 12647542 | 359811 | 56.446  | 50.978   |
| Total |           | 22406626 | 705822 | 100.000 | 100.000  |

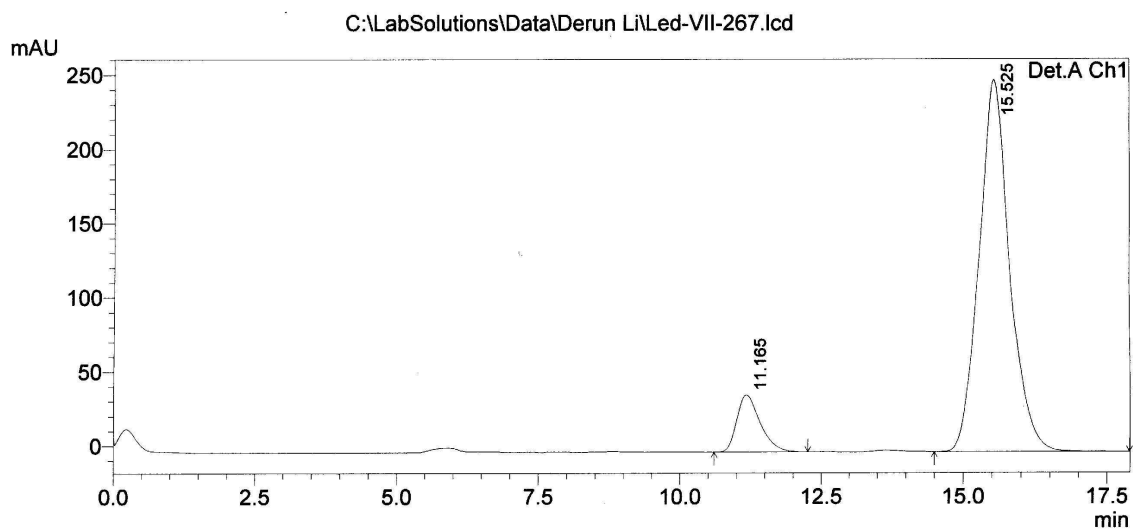

PeakTable

| Peak# | Ret. Time | Area     | Height | Area %  |
|-------|-----------|----------|--------|---------|
| 1     | 11.165    | 1103157  | 38484  | 10.580  |
| 2     | 15.525    | 9323368  | 250740 | 89.420  |
| Total |           | 10426526 | 289224 | 100.000 |

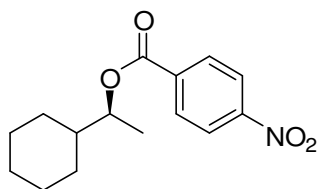

**(S)-1-Cyclohexylethyl 4-nitrobenzoate (4-nitrobenzoate of 36)**

[Chiralcel OJ-H column (250 mm × 4.6 mm), 0.1% *i*PrOH/hexane, 0.4 mL/min, 254 nm]

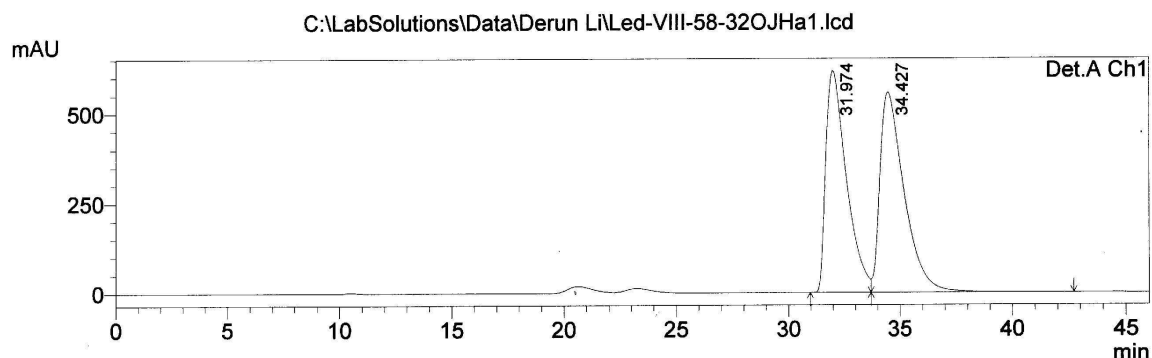

PeakTable

| Peak# | Ret. Time | Area     | Height  | Area %  |
|-------|-----------|----------|---------|---------|
| 1     | 31.974    | 39677846 | 617205  | 48.571  |
| 2     | 34.427    | 42011827 | 557503  | 51.429  |
| Total |           | 81689673 | 1174708 | 100.000 |

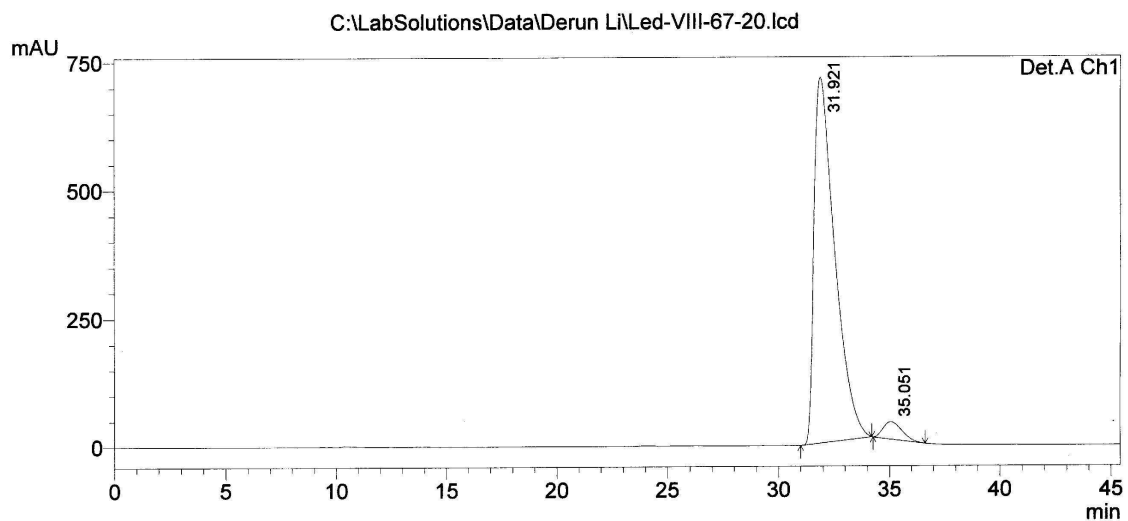

PeakTable

| Peak# | Ret. Time | Area     | Height | Area %  |
|-------|-----------|----------|--------|---------|
| 1     | 31.921    | 46434821 | 713230 | 95.803  |
| 2     | 35.051    | 2034201  | 34307  | 4.197   |
| Total |           | 48469022 | 747537 | 100.000 |

# VI. NMR spectra

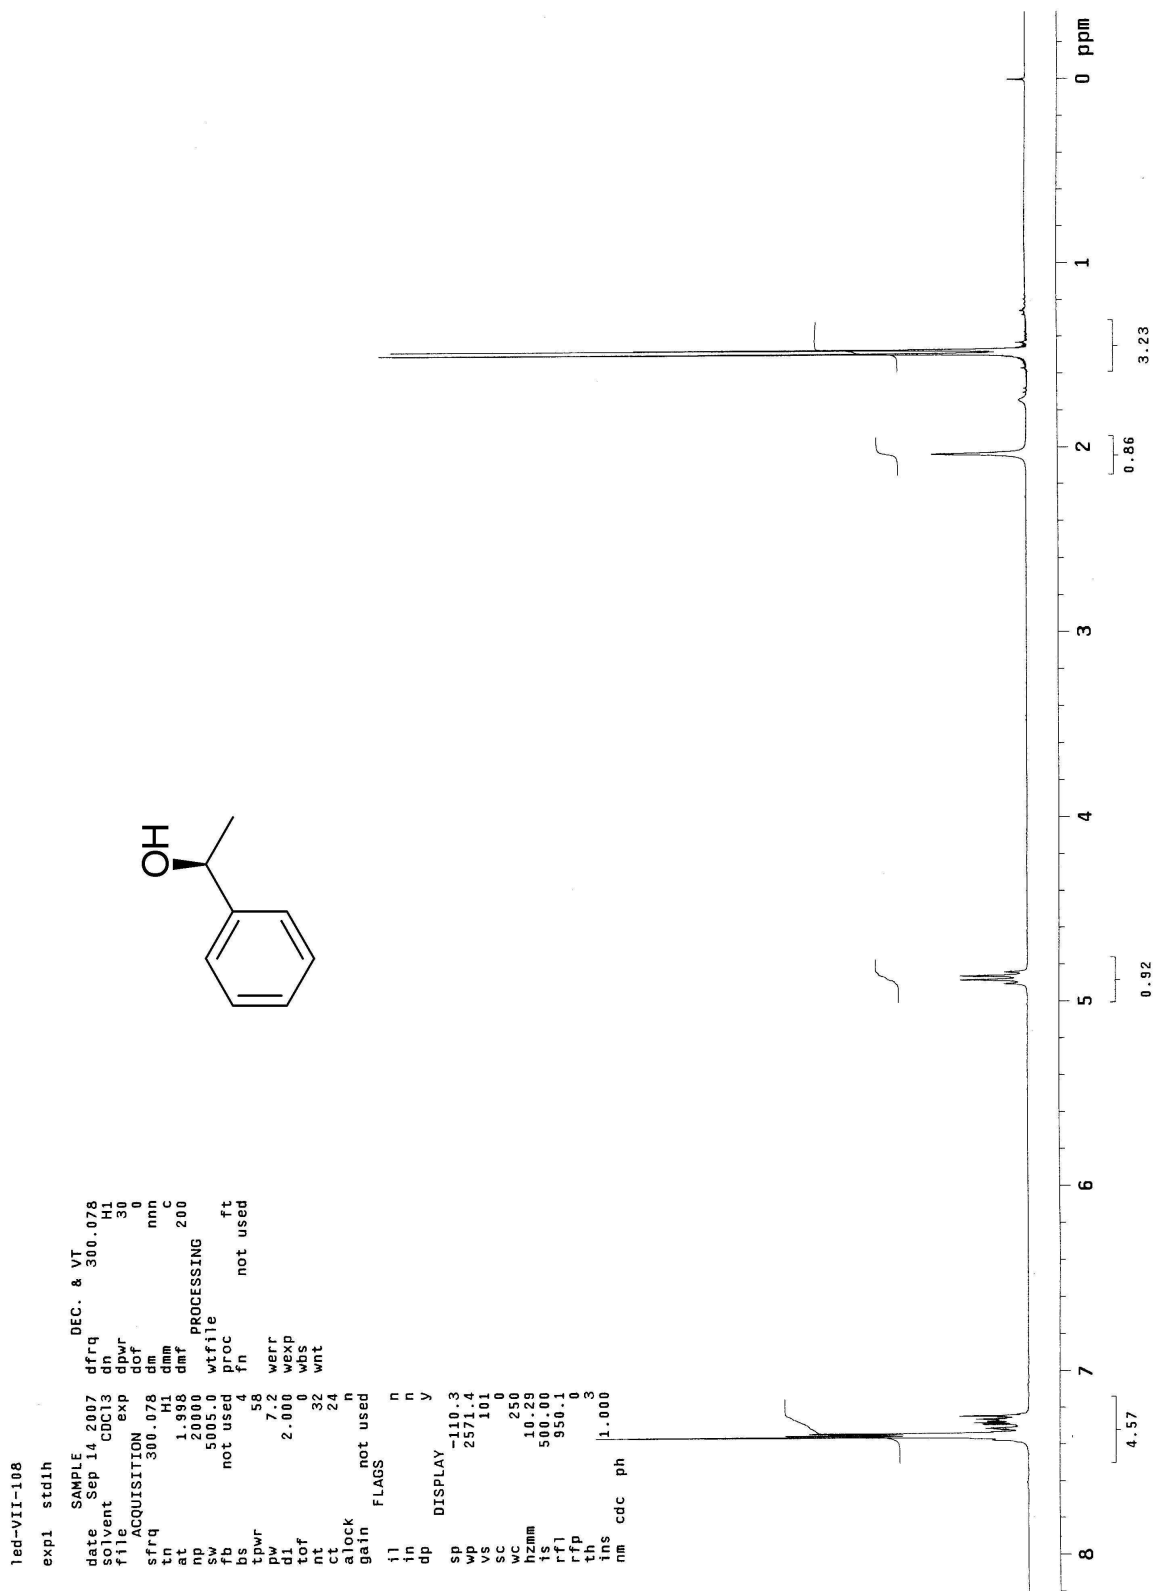

1ed-VII-108-C13

expl std13c

SAMPLE DEC. & VT  
date Sep 14 2007 dfrq 300.078  
solvent CDC13 dn 37  
file exp dpr 37  
ACQUISITION dm nyv  
tn 75.462 dm w  
at 1.000 dmf 10400  
np 40000 lb PROCESSING 1.00  
sw 20000.0 wf file  
fb not used 4 proc ft  
bs 4 fn not used  
tpwr 56  
pw 44  
d1 1.000 werr  
d2 1.000 wexp  
tof 0 wbs  
nt 1000 wnt  
ct 192  
alock n  
gain not used  
FLAGS  
ll n  
ln n  
dp y  
SD DISPLAY -325.8  
wp 13534.3  
vs 207  
sc 0  
wc 250  
hzmm 54.14  
ls 500.00  
rfi 557.3  
rfp 5527.6  
th  
ins 100.000  
ai no ph

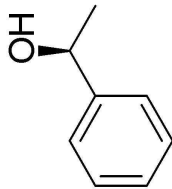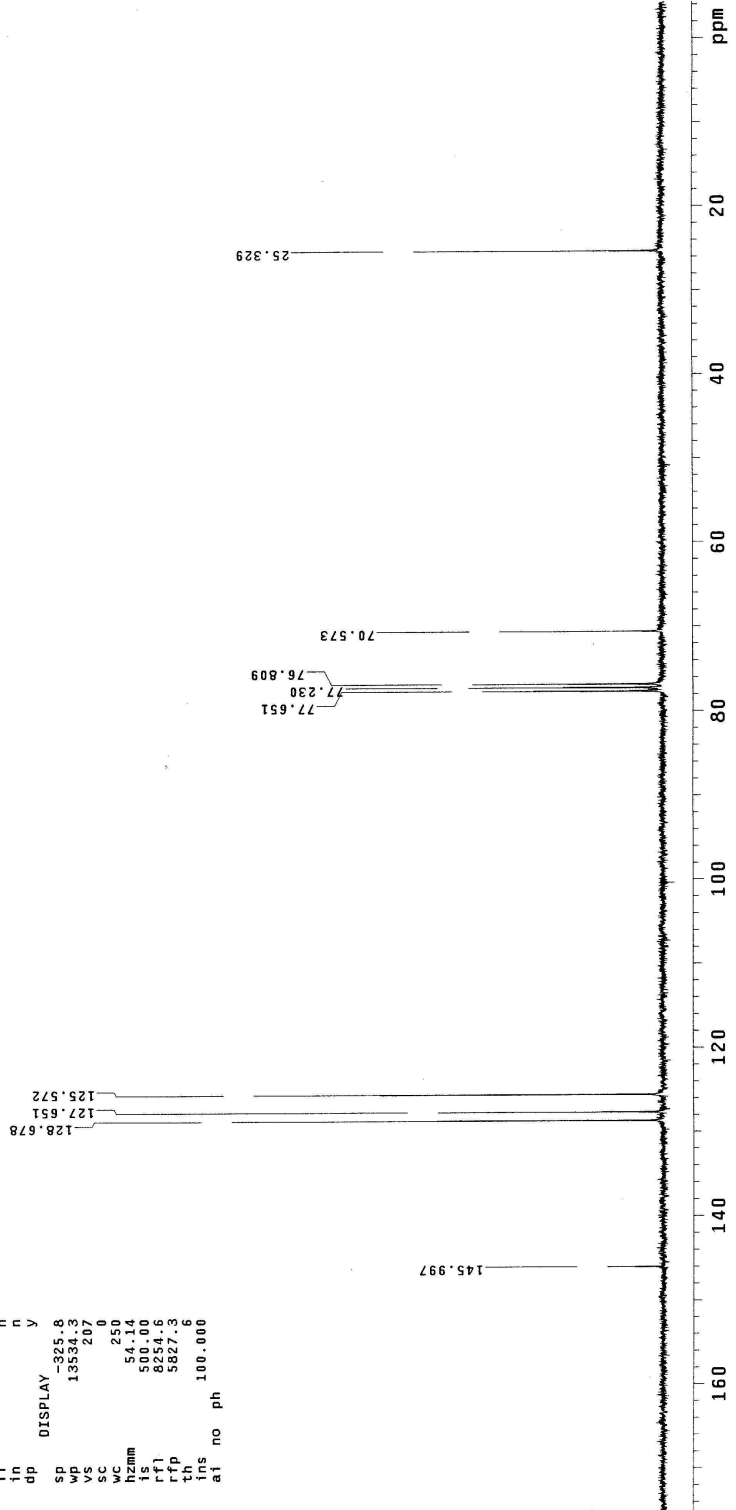

led-VII-90-29

exp1 stdih

SAMPLE DEC. & VT  
date Nov 27 2007 dfrq 300.078  
solvent CDCl3 dmvr 4  
file 300.078 exp 30  
ACQUISITION exp 30  
sfrq 300.078 dm nnn  
tn H1 dm C  
at 1.998 dmf PROCESSING 200  
np 50000 wtfle  
pw not used proc ft  
bs 4 fn not used

tpwr 58 werr  
pw 7.2 wepp  
di 2.000 wexp  
tof 0 wbs  
rt 32 wnt  
clock 24  
gain n

FLAGS not used

ll n  
in n  
dp y

SP DISPLAY -150.3  
WD 2687.0  
VS 91  
SC 0  
WC 250  
HZMM 11.55  
IS 500.00  
RF 943.0  
TH 6  
INS 2.000  
NM CDC PH

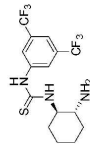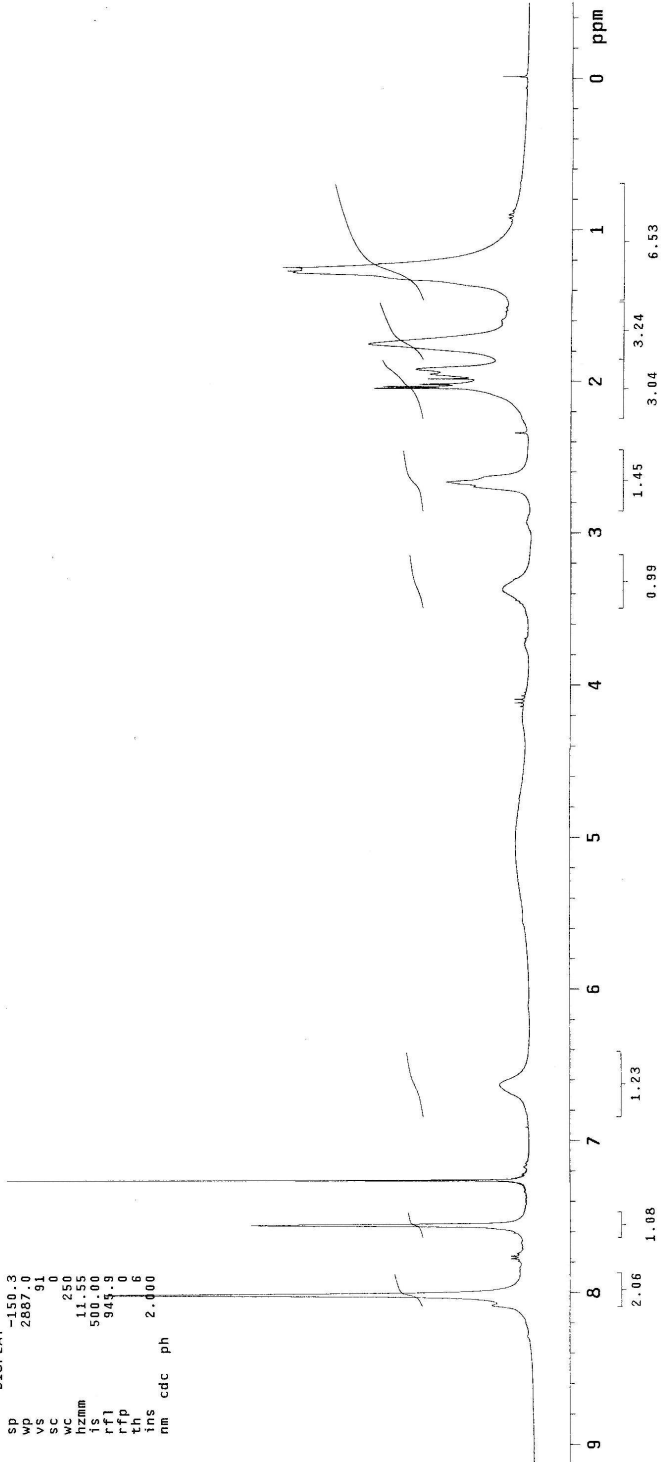

exp1 std13c

SAMPLE DEC. & VT  
date Nov 27 2007 dfrq 300.078  
in CDC10-37  
f01ventdata/f01-96-29-37  
r11/led-vi-96-29-37  
C13.fid dm nvy  
C13.fid dm nvy  
ACQUISITION 75.462 dmf 10400 w  
tn C13 lb PROCESSING 1.00  
at 1.000 lb wfile  
sp 20000.0 proc  
fb not used fn not used  
bs 100  
tpwr 56 werr  
pw 4.4 wexp  
d1 1.000 wbs  
d2 1.000 wnt  
tcf 20000  
ct 12826  
alock not used  
gain not used  
FLAGS  
ll n  
in n  
in n  
dp DISPLAY y  
SP 2423.0  
WP 20000.0  
VS 839  
SC 0  
WC 250  
HZMM 80.00  
F 500.00  
R 2423.0  
rfp 0  
th 3  
ins 100.000  
ai no ph

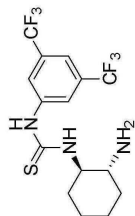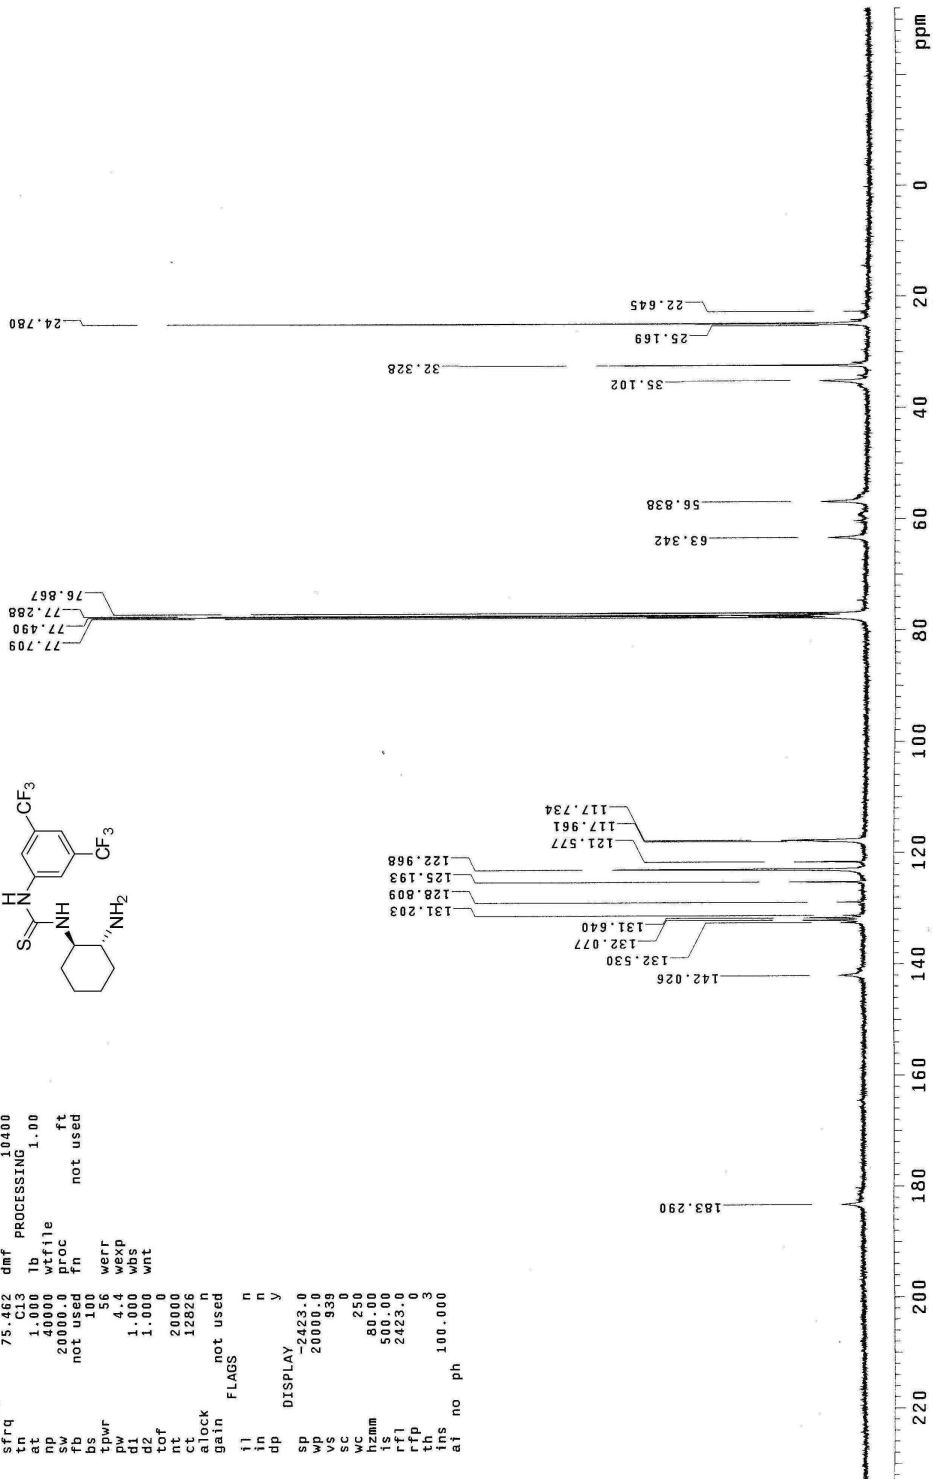

led-vii-98-21

exp1 std1h

DEC. & VT  
date Nov 24 2007 dfrq 300.078  
solvent CDC13 dn H1  
file exp 30  
ACQUISITION dpwr 30  
sfrq 300.078 dm 0  
in 1.951 dnm nnn  
nt 2000 dm7 200  
sw 5005.0 wtfile  
bs not used proc ft  
tpwr 58 fn not used  
pw 7.2 werr  
di 2.000 wexp  
cof 0 wds  
ct 28 wnt  
ct 28  
alock n  
gain not used  
FLAGS  
ll n  
in n  
in n  
dp y  
SP DISPLAY -77.9  
WD 2953.0  
VS 119  
SC 0  
WC 250  
hzmm 11.81  
ls 500.00  
rfp 943.0  
th 11  
ins 1.000  
nm cdc ph

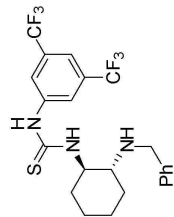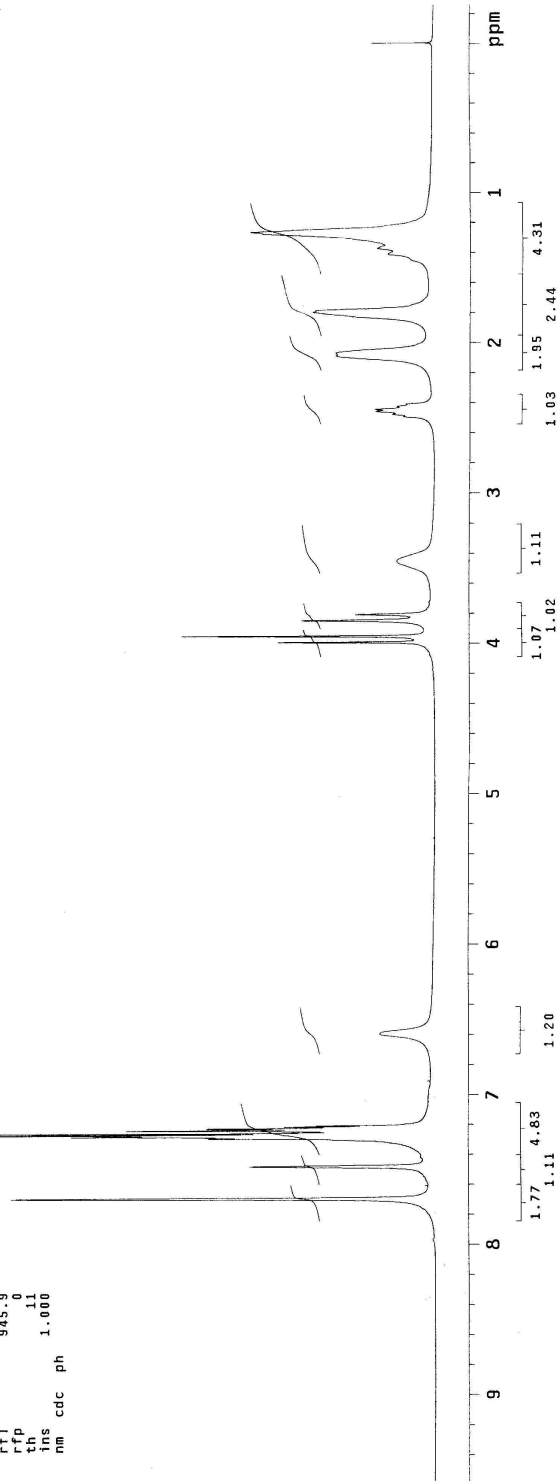



led-VII-98-21-C13

expl std13c

SAMPLE DEC. & VT  
date Nov 26 2007 dfrq 300.078  
solvent CDCl3 dn 37  
fl 0 dnr 0  
ACQUISITION exp dof 0  
sfrq 75.462 dm nvv w  
tn C13 dmm 10400 w  
at 1.0000 lb PROCESSING  
sw 20000.00 wf 1.00  
not used wfile  
bs 4  
ts 56 fn not used  
tdwr 4.4  
pw 1.000 weff  
d1 1.000 wepp  
d2 1.000 wexp  
tof 200 wds  
ct 1156 wnt  
gain not used  
alock n  
gain not used  
FLAGS  
f1 n  
f2 n  
f3 n  
f4 y  
SP -986.7  
WD 17319.3  
VS 463  
SC 0  
WC 250  
hzm 500.00  
hzmm 8257.1  
rf1 5825.1  
rfp  
th 5  
ins 100.000  
a1 no ph

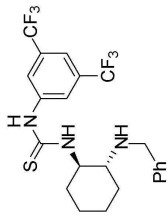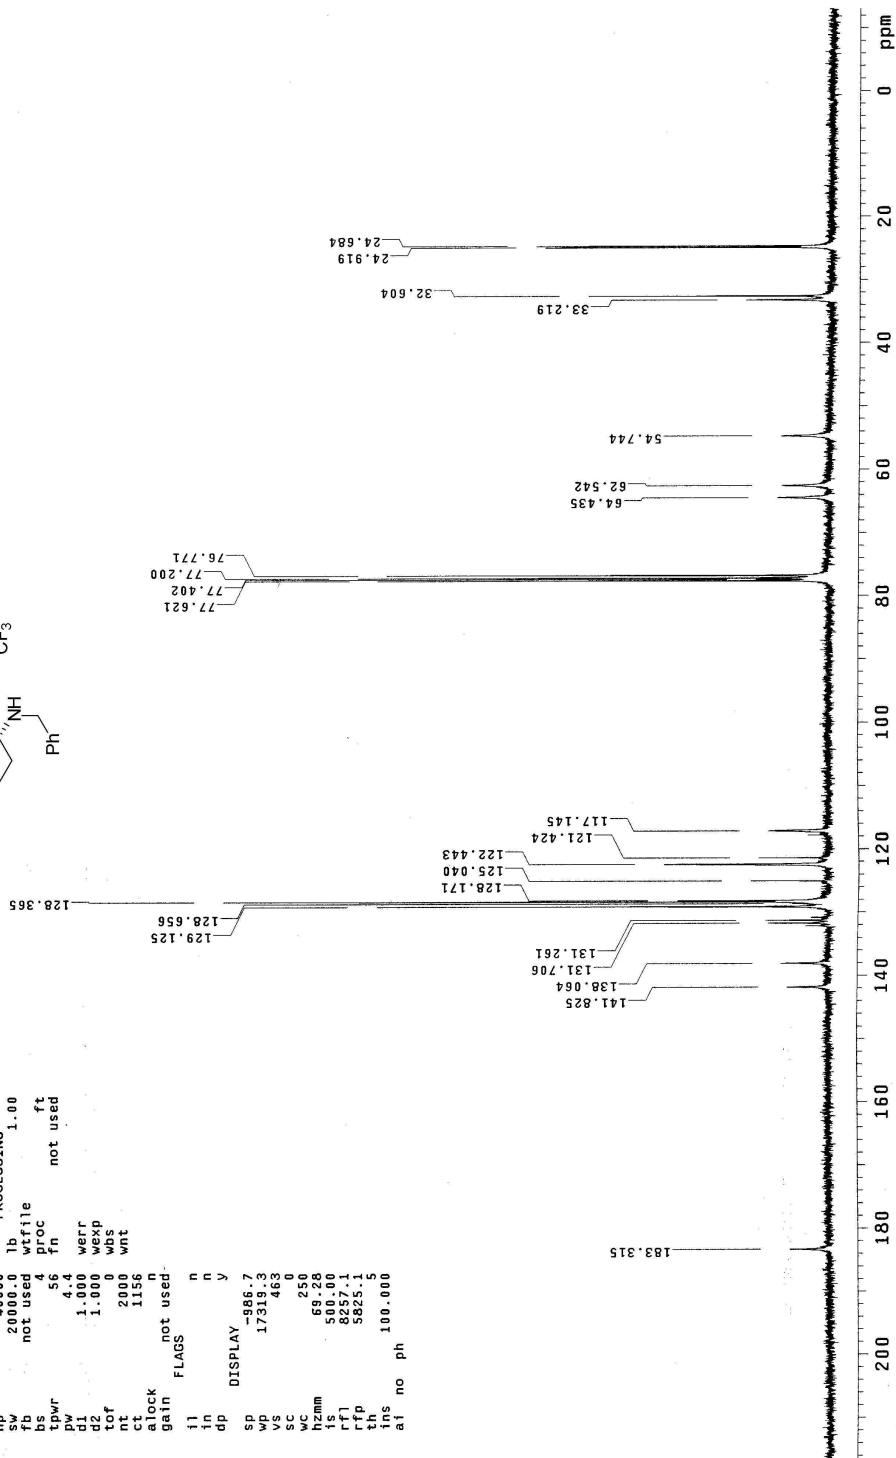

1ed-VII-126-23

expl stdlh

SAMPLE DEC. & VT  
date Sep 15 2007 dfrq 300.078  
file C0013 dn H1  
solvent CDCl3 dpwr 30  
ACQUISITION exp 30  
sfrq 300.078 dm 0  
tn H1 dmm nnn  
at 1.998 dmf C  
np 20000 dmf PROCESSING  
sw 5003.0 wffile  
bs not used f0c ft  
bs not used fn not used  
tpwr 58 werr  
pw 7.2 wexp  
d1 2.000 wbs  
tof 0 wnt  
nt 32  
ct 28  
alock n  
gain not used  
il n  
in n  
dp n  
SP DISPLAY -31.8  
wp 2985.7  
vs 118  
sc 0  
wc 250  
hzmm 11.94  
ls 500.00  
rfi 945.3  
tff 6  
ins c  
nm cdc ph 1.000

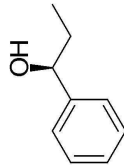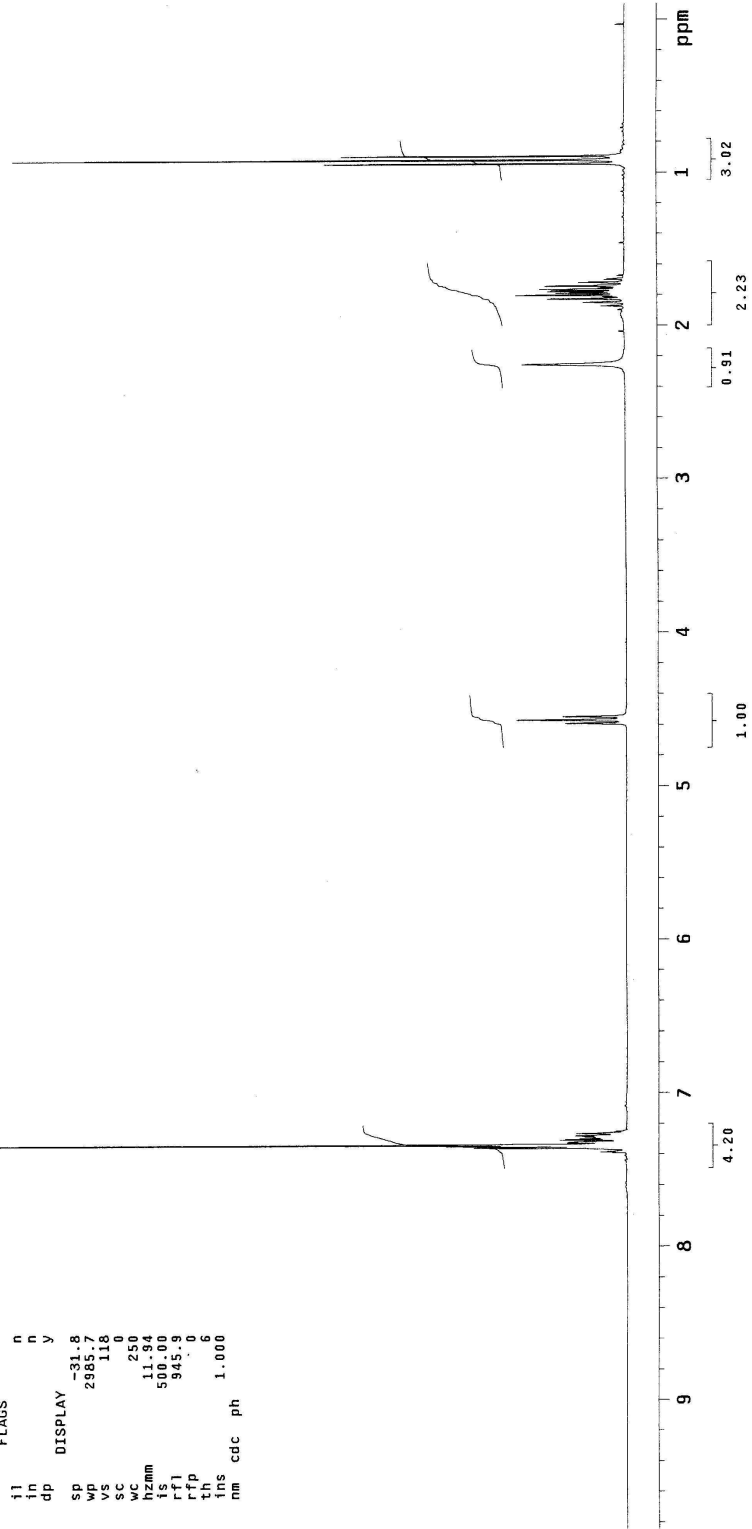

13C OBSERVE

expl std13c

SAMPLE DEC. & VT  
 date Sep 15 2007 dfrq 300.078  
 solvent CDCl3 dn 37 H1  
 file exp 37  
 ACQUISITION exp 0  
 tn C13 dm nvv  
 tc 1.000 dm 10400 W  
 pt 4000 dmf PROCESSING 1.00  
 sw 20000.0 lb  
 not used wfile  
 bs 4 proc ft  
 tpwr 56 fn not used  
 pw 4.4  
 dl 1.000 werr  
 dz 1.000 wexp  
 cof 1000 wds  
 ct 424 Wnt  
 alock not used  
 gain FLAGS  
 il n  
 in n  
 dp n  
 DISPLAY y  
 SP 2352.2  
 WP 16320.1  
 VS 96  
 SC 0  
 WC 250  
 hzmm 65.28  
 IS 500.00  
 FFI 5255.3  
 TH 5827.9  
 INS 100.000  
 AI no ph

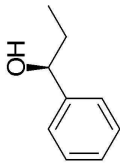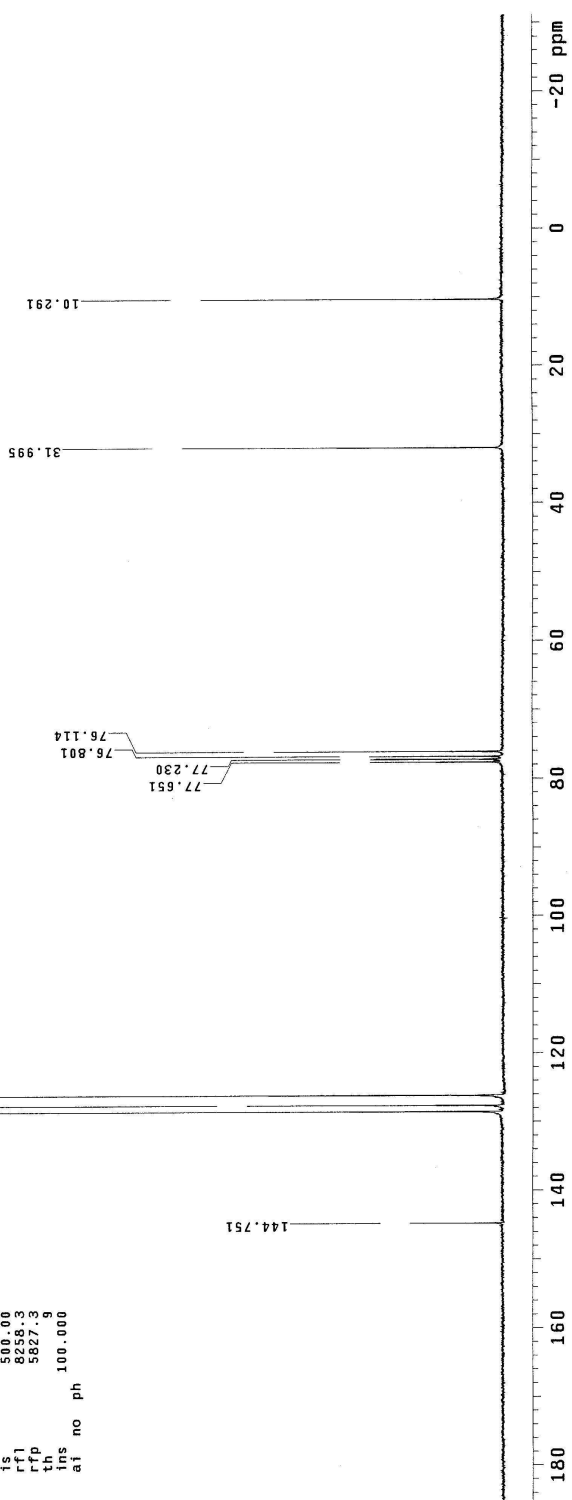

led-VII-141-29

exp1 std1h

```
SAMPLE          DEC. & VT
date   Oct 1 2007   dfrq   300.078
solvent Oct CDC13   dn     H1
file   exp         dpwr   30
ACQUISITION      dof    0
sfrq   300.078   dm     nnn
tn     1.006     dmm   C
at     20006    dmf   200
sv     5005.0   wfile
fb     not used  proc   ft
bs     4        fn     not used
tpwr   58
pw     7.2     werr
dl     2.000   wexp
tof    0      wbs
nt     32     wnt
ct     24
clock  not used
gain   not used
il     0
in     0
dp     Y
DISPLAY -25.4
sp     2998.8
vs     110
sc     0
NCmm   250
ISmm   1200
rfl    500.00
rffl   945.9
th     0
ins    5
nm     1.000
cdc    ph
```

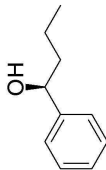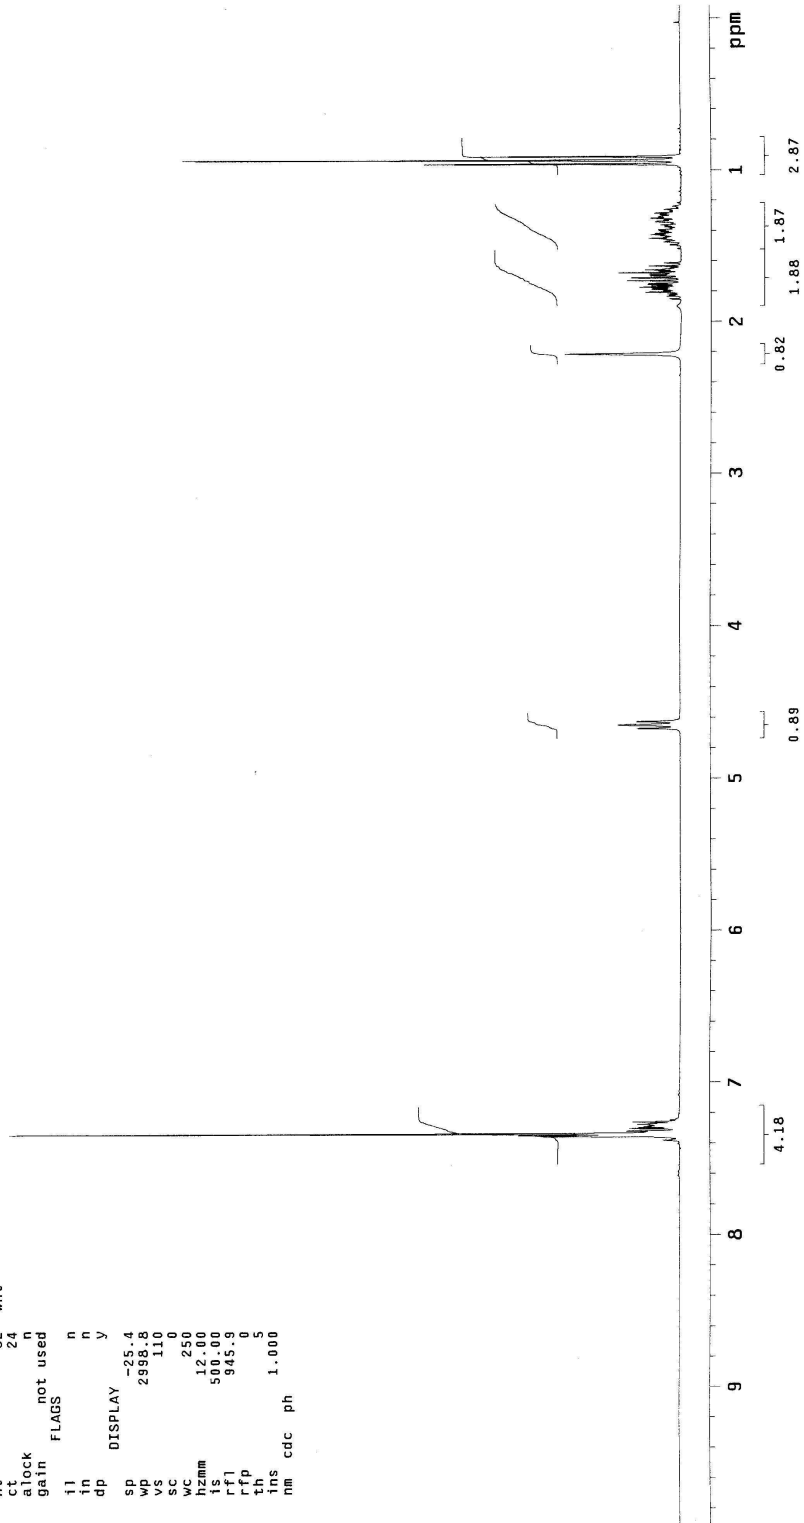

13C OBSERVE

```
exp1 std13c
SAMPLE
date Oct 1 2007 DEC. & VT
solvent CDC13 dn 300.078 H1
file exp 37
ACQUISITION
sfrq 75.462 dm nvy
sc 1.000 dmm 10400
np 40000 lb PROCESSING 1.00
sw 20000.0 wtfile
fb not used 4 proc ft
bs 56 fn not used
tpwr 44
pw 1.000 werr
d2 1.000 wexp
tof 0 wpsp
nt 1000 wnt
ct 232
alock n
gain not used
FLAGS n
il n
in n
dp DISPLAY v
sp -512.0
wp 13823.7
sc 80
wc 250
h2mm 55.29
is 500.00
rf1 8257.7
rfp 5827.3
ins
ai no ph
```

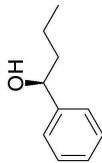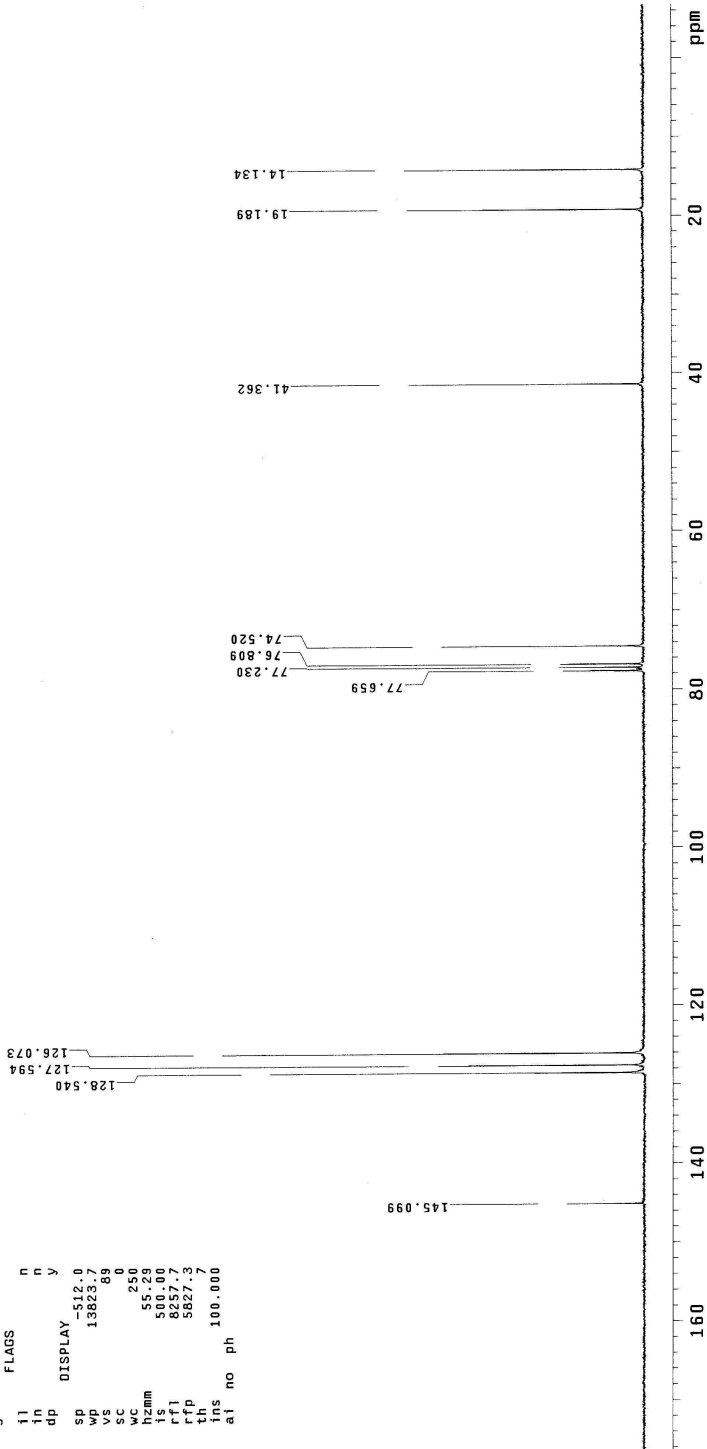

led-VII-201

expl stdih

SAMPLE DEC. & VT  
date Nov 21.2007 dfrq 300.078  
solvent CDCl3 dnmr 30  
F1 ACQUISITION exp 30  
sfrq 300.078 dm nnn  
tn H1 dmm C  
at 1.998 dmf PROCESSING 200  
np 20000 wffile  
sw 5005.0 proc ft  
bd not used  
bi 4  
tpwr 58  
pw 7.2 weff  
d1 2.000 wexp  
tof 0 wbs  
nt 32 wnt  
ct 16  
ct alock  
gain not used  
n  
i1 n  
in n  
dp n  
sp DISPLAY -11.9  
wp 2762.7  
sc 200  
wc 250  
hzmh 11.07  
ls 500.00  
rf1 945.9  
rfp 9  
in 9  
ins 1.000  
nm cdc ph

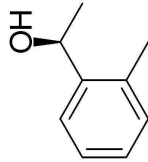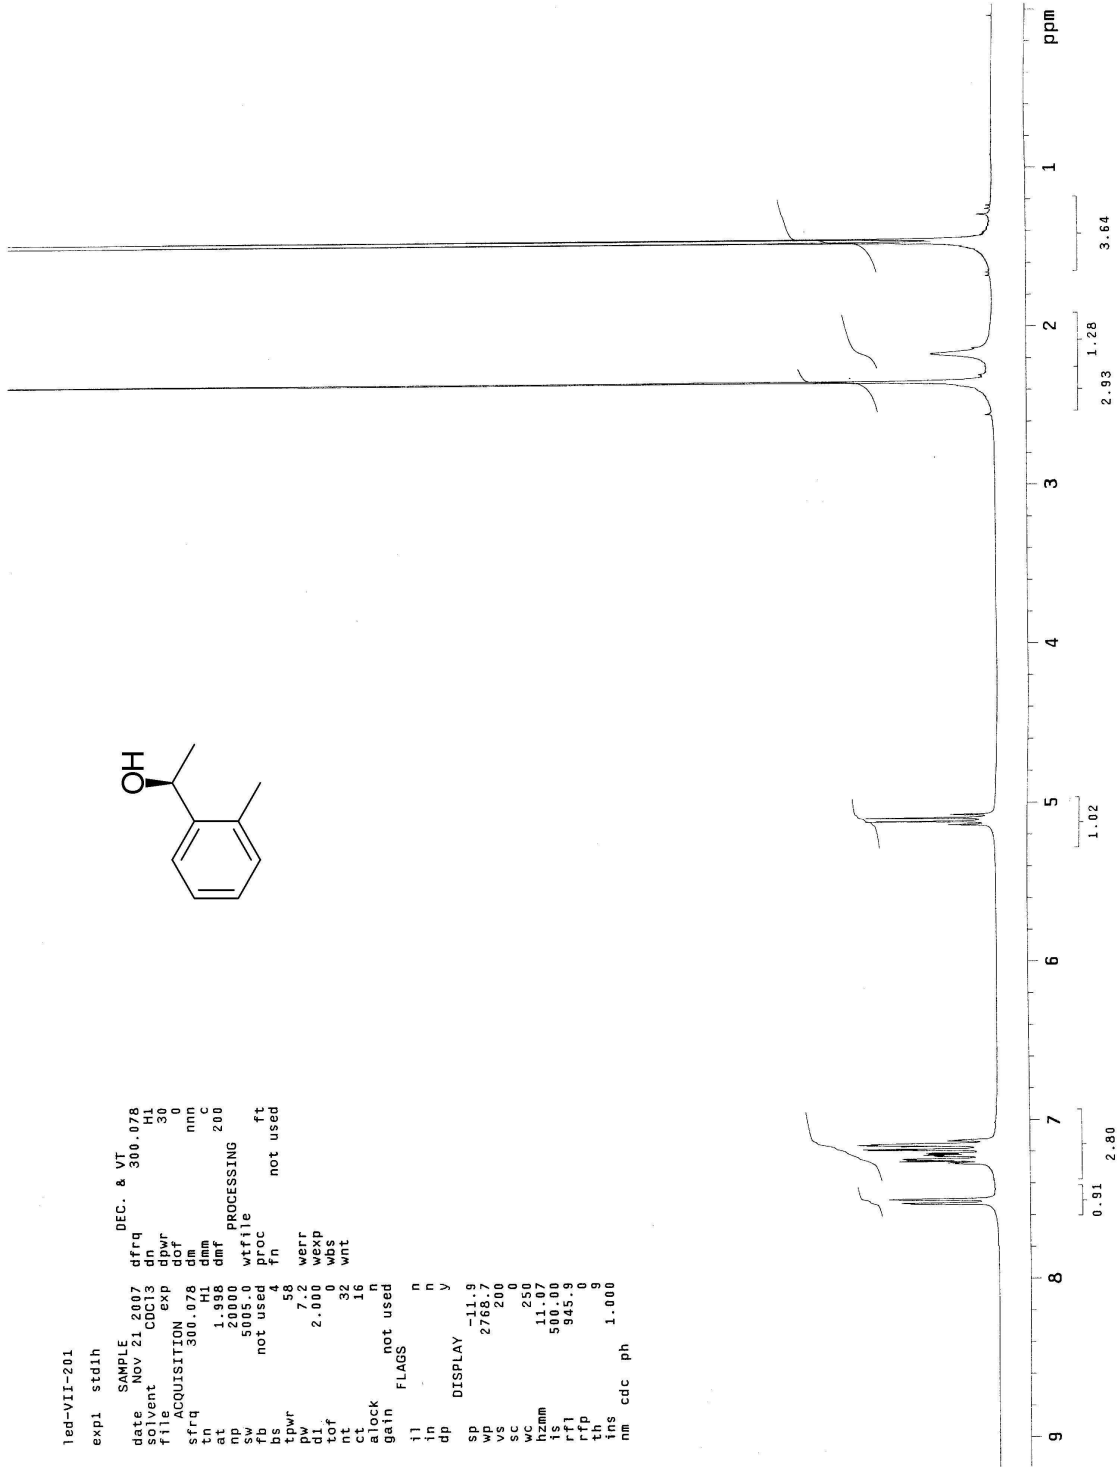

led-VII-201-C13

expl std13c

SAMPLE DEC. & VT  
date NOV 21 2007 dfrq 300.078  
solvent CDCl3 dn H1  
file exp 37  
ACQUISITION dof 0  
sfrq 75.462 dm nyu  
tn 1.03 dmm  
nd 4000 dmt 10400  
sw 20000.0 lb PROCESSING 1.00  
fb not used wtfile  
bs 4 proc ft  
tpwr 56 fn not used  
pw 4.4  
d2 1.000 werr  
d2 1.000 wps  
tof 1000 wnt  
nt 892  
ct not used  
alock gain  
gain not used  
n  
l n  
l n  
l n  
dp y  
DISPLAY  
sp -1041.0  
wp 15610.8  
vs 273  
sc 0  
wzmm 562.44  
ls 500.00  
rf1 8258.9  
rfp 5825.1  
th  
ins 100.000  
at no ph

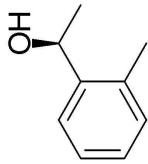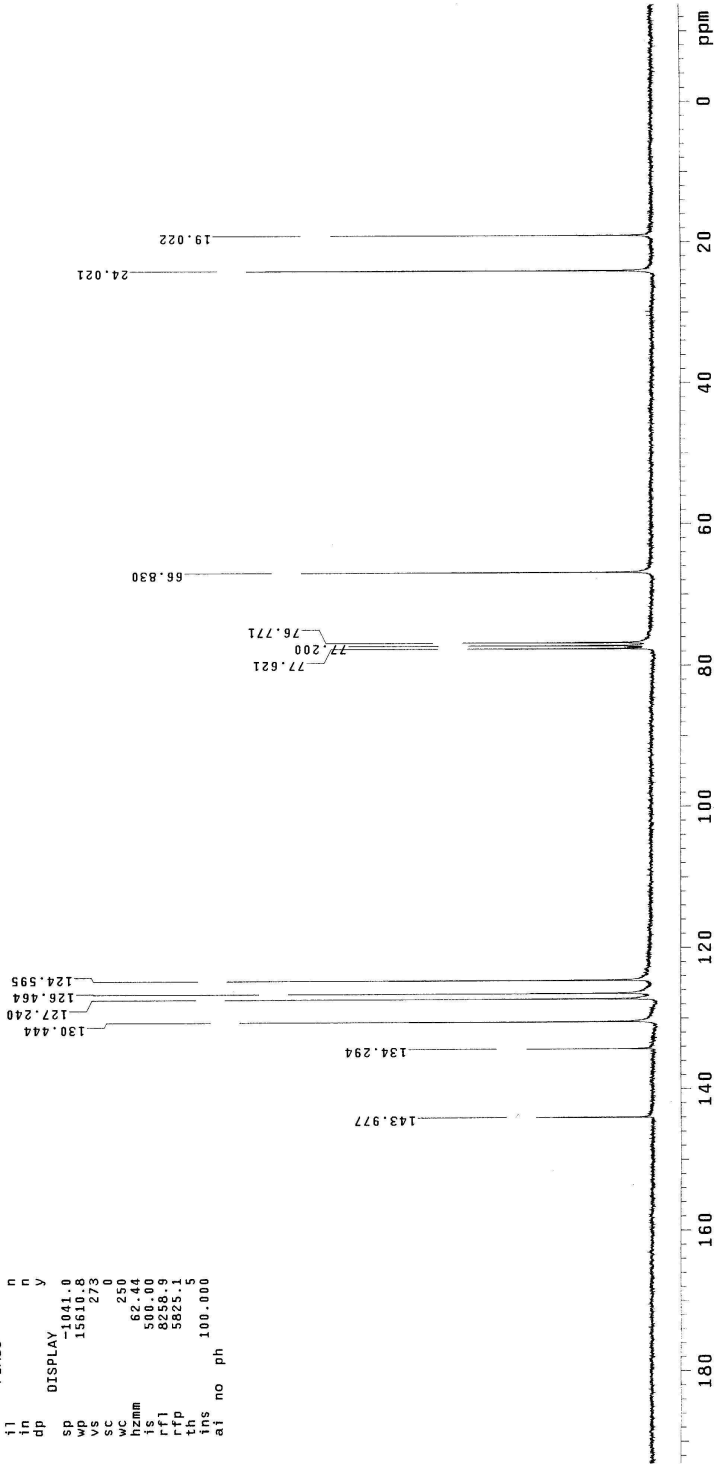

led-VII-131-29

expl std1h

SAMPLE DEC. & VI  
date Sep 22 2007 dfrq 300.078  
solvent CDC13 dn H1  
file exp 30  
ACQUISITION dof 0  
sfrq 300.078 dm nnn  
in H1 dnm C  
nd 2000 dmr PROCESSING 200  
sw 5005.0 wtfile ft  
bs not used proc not used  
fn 4  
tpwr 58  
pw 7.2 wefr  
dl 2.000 wexp  
tof 0 wds  
ct 26 wnt  
atlock n  
gain not used  
flags n  
fl n  
in n  
dp y  
SP DISPLAY  
sp -58.1  
vp 2958.4  
wc 163  
sc 0  
wc 250  
hzmm 11.84  
is 500.00  
rf1 945.9  
rfp 0  
th 12  
ms 1.000  
nm cdc ph

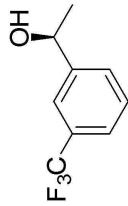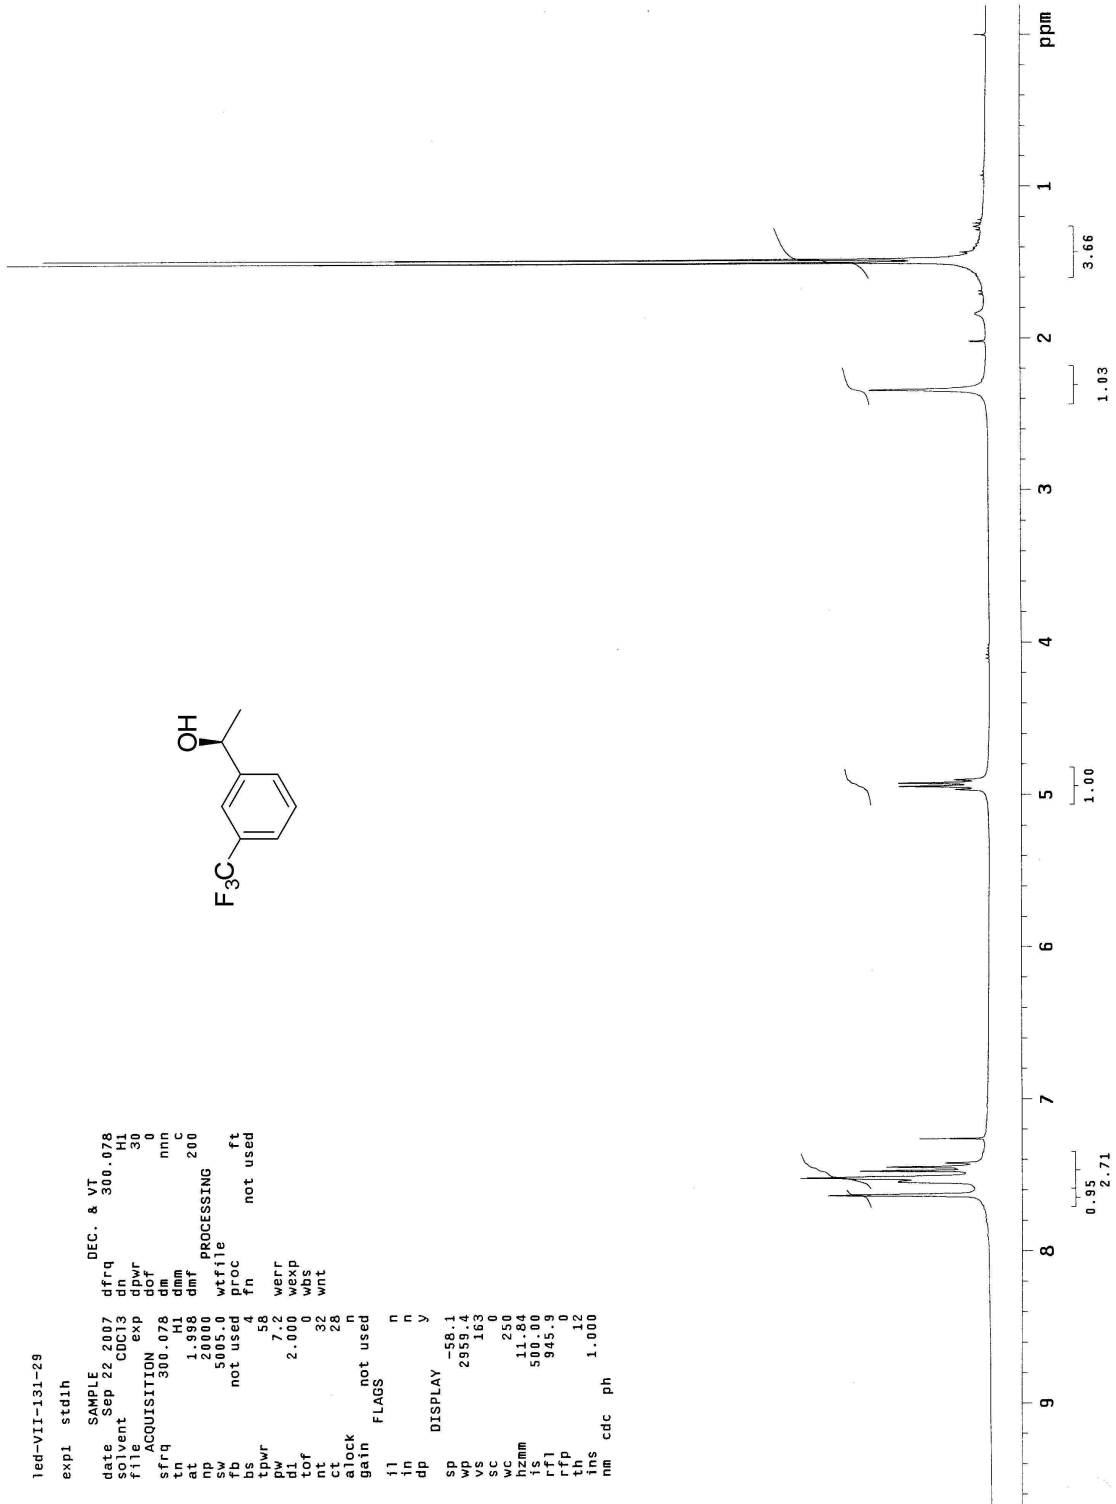



led-VII-131-29-C13

exp1 std13c

SAMPLE DEC. & VT  
date Sep 22 2007 dfrq 300.078  
solvent CDCl3 in H1  
f1 ACQUISITION exp 3  
df 0  
sfrq 75.462 dm nyv  
tn C13 dmm w  
at 1.000 dmf 10400  
np 40000 lb PROCESSING  
sw 20000.0 wfile 1.00  
bs not used  
bs 4  
tpwr 56 ft  
pw 4.4 fn not used  
d1 1.000 werr  
d2 1.000 wexp  
tof 0 wbs  
nt 1000 wnt  
st 446  
slck not used  
gain  
flags  
il n  
in n  
dp n y  
SP DISPLAY 1253.8  
w 47  
vs 11679.0  
sc 565  
wc 250  
hzm 47.52  
ls 500.00  
rf 562.3  
th 562.3  
ins 11  
ai no ph 100.000

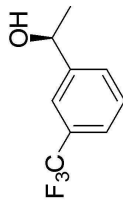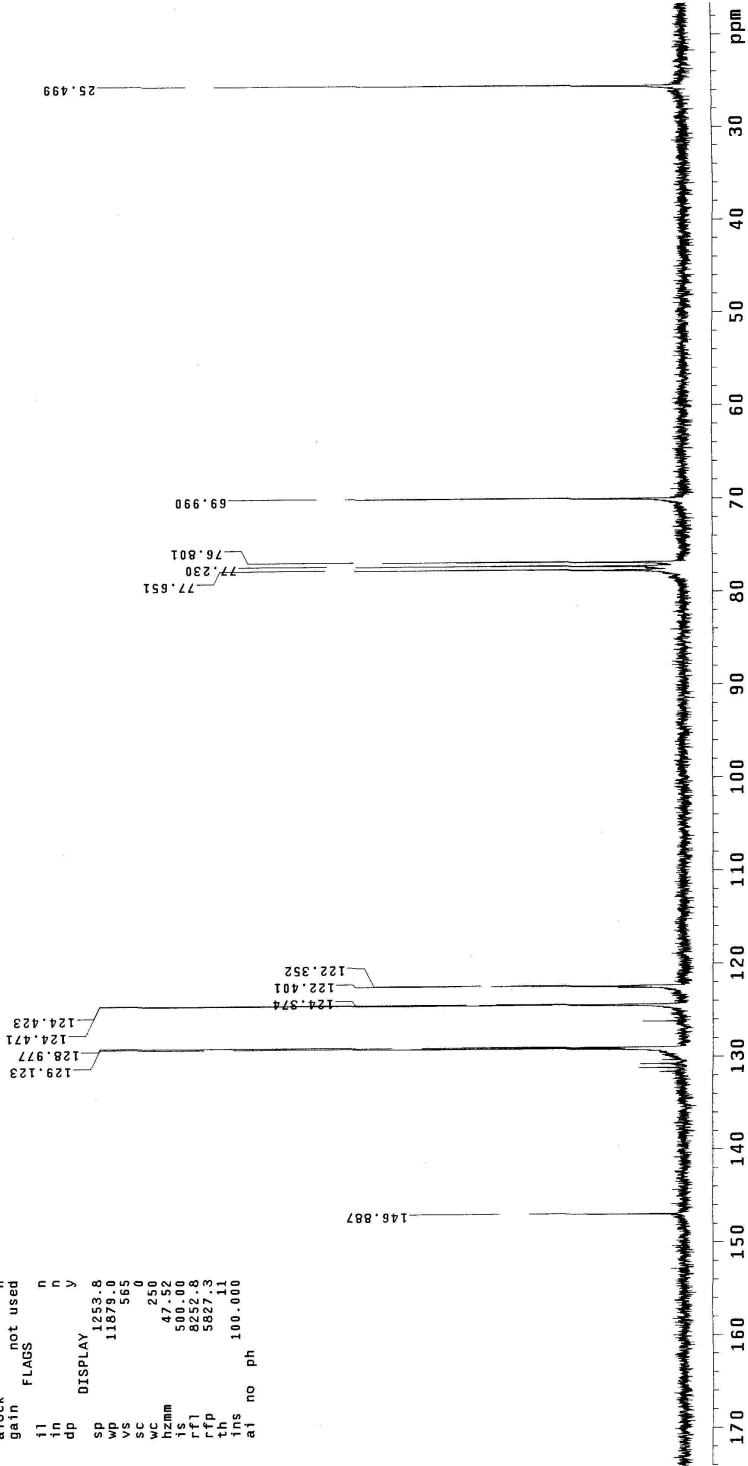

led-vii-125-29

expl std1h

SAMPLE DEC. & VI  
date Sep 15 2007 dfrq 300.078  
solvent CDCl3 dn  
f1 ACQUISITION exp dpr 50  
f2 ACQUISITION exp dpr 50  
sfrq 300.078 dm mnc  
in 1.998 dmf 200  
at 20000 wtfile PROCESSING  
np 5005.0 not used ft  
fb not used proc not used  
bs 4  
cpwr 58 werr  
pw 7.2 wexp  
Tof 2.000 wps  
nt 32 wnt  
ct 24  
alock n  
gain not used  
FLAGS  
ll n  
in n  
dp y  
SP DISPLAY  
sp 130.5  
vs 267.33  
sc 130  
wc 250  
hzmm 10.47  
ls 500.00  
rfl 945.9  
rfp 0  
th 6  
ins cdc 1.000  
nm ph

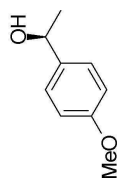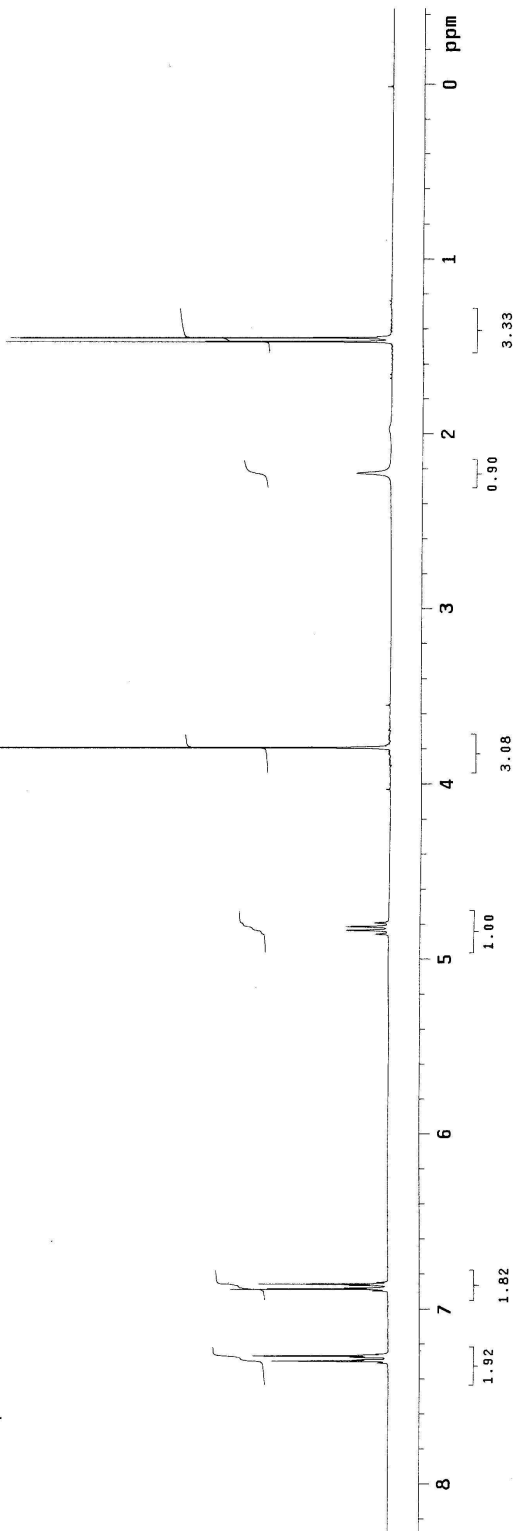

led-VII-125-29-C13

exp1 std13c

SAMPLE DEC. & VT  
date Sep 15 2007 dfrq 300.078  
solvent CDC13 dn HI  
file exp dpwr 57  
ACQUISITION exp 0  
sfrq 75.062 dnr nyv  
tn 75.062 dnm nyw  
at 1.000 dmf 10400  
np 40000.0 lb PROCESSING  
sw 20000.0 wf 1.00  
bs not used wfile ft  
fb not used 4 proc not used  
tpwr 56 fn  
pw 4.00  
d2 1.000 werr  
nt 1.000 wexp  
tof 0 wbs  
nt 1000 wnt  
ct 92  
alock not used  
gain  
FLAGS  
il n  
in n  
dp y  
SP DISPLAY  
wp -2272.9  
vs 16820.0  
vs 1.43  
wc 250  
hzmm 567.28  
rl 8557.7  
rfl 5827.3  
th 100.000  
ai no ph

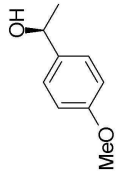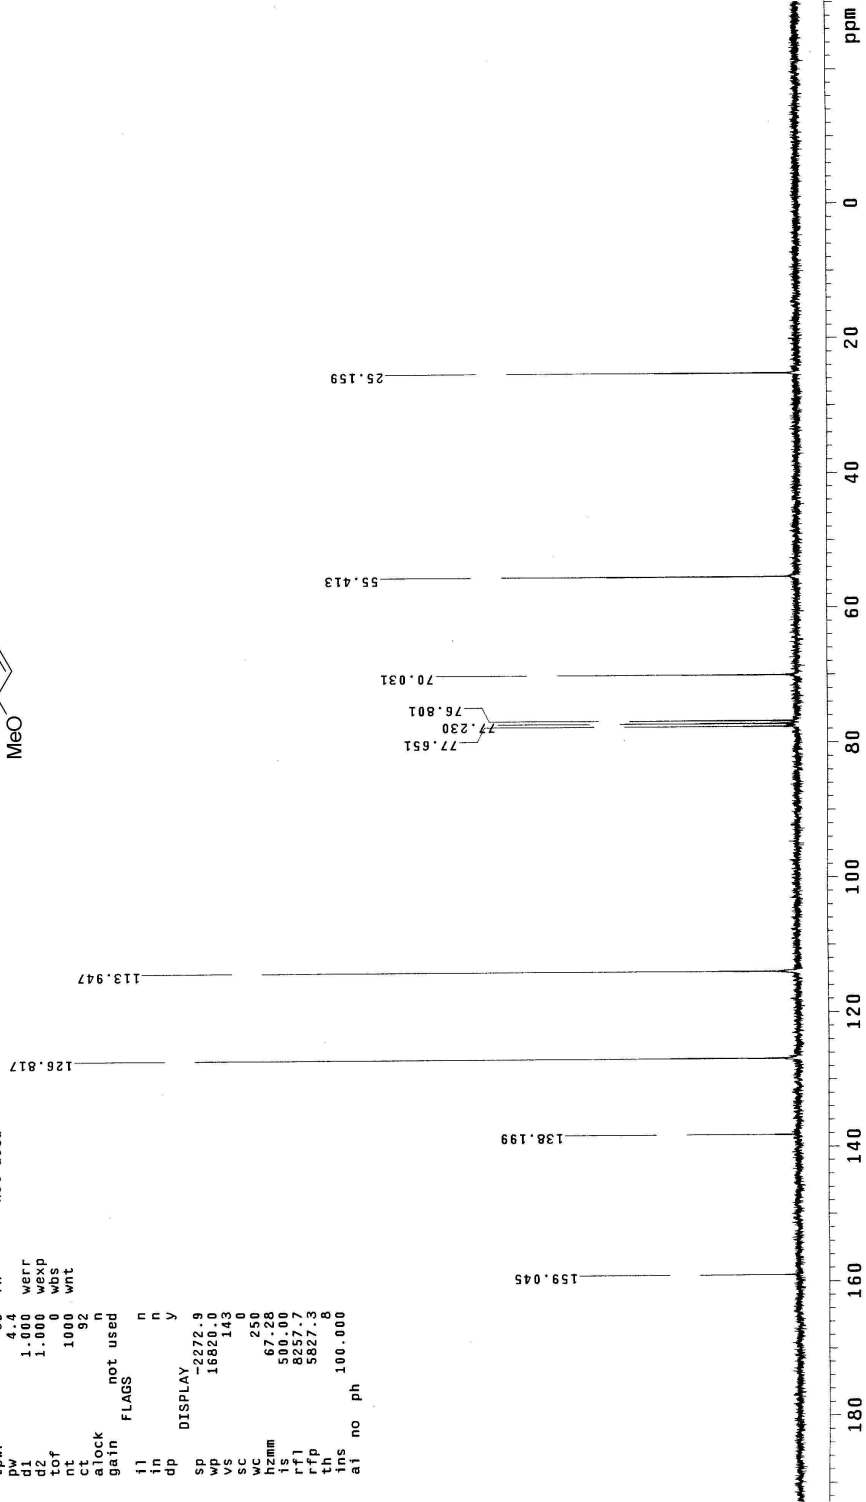

led-VII-128-27

exp1 std1h

```

SAMPLE          DEC. & VT
date    Sep 19 2007    dfrq    300.078
solvent  Sep 19 2007    dn      HI
file     Sep 19 2007    exp     30
ACQUISITION     dpr      0
          dpr      0
          dm       mm
          at       1.988
          np       2000
          sw       5005.0  wifile
          bs       not used  proc    ft
          tpwr     58       fn      not used
          pw       7.2      werr
          dl       2.000    wexp
          tcf      0       wds
          ct       24      wht
          alock   not used
          gain    not used
          FLAGS
          il      n
          in      n
          dp      y
          sp      282.3
          wp      2800.9
          vc      1.7
          sc      0
          wc      250
          hzmm    11.52
          fs      500.00
          rfl     945.9
          rfp     0
          th      22
          ns      1.000
          nm      cdc
          ph

```

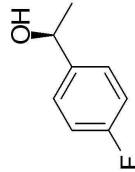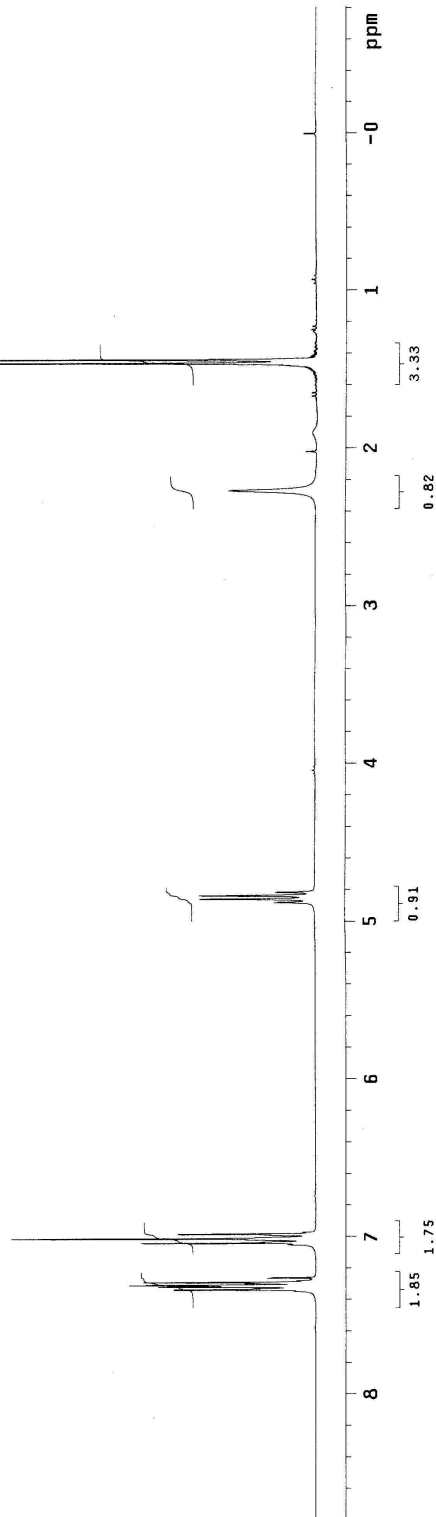

led-vii-128-27-C13

exp1 std13c

DEC. & VT  
SAMPLE date Sep 19 2007 dfrq 300.078  
solvent CDC13 dn 37 H1  
file exp 37  
ACQUISITION dof 0  
frrq 75.462 nm nvy  
at 1.000 dm 10400  
np 40000 lb PROCESSING 1.00  
sw 20000.0 wf file  
fb not used wfile  
bs 4 proc ft  
tpwr 56 fn not used  
pw 4.4 warr  
d2 1.000 wexp  
tof 0 wbs  
nt 1000 wnt  
ct 136  
alock not used  
gain  
FLAG  
ll n  
in n  
dp y  
SD DISPLAY -1796.8  
wp 16530.7  
vs 329  
sc 0  
wc 250  
hzmm 56.16  
f1 8254.6  
rf1 5827.3  
th 9  
ins 100.000  
a1 no ph

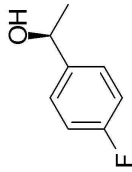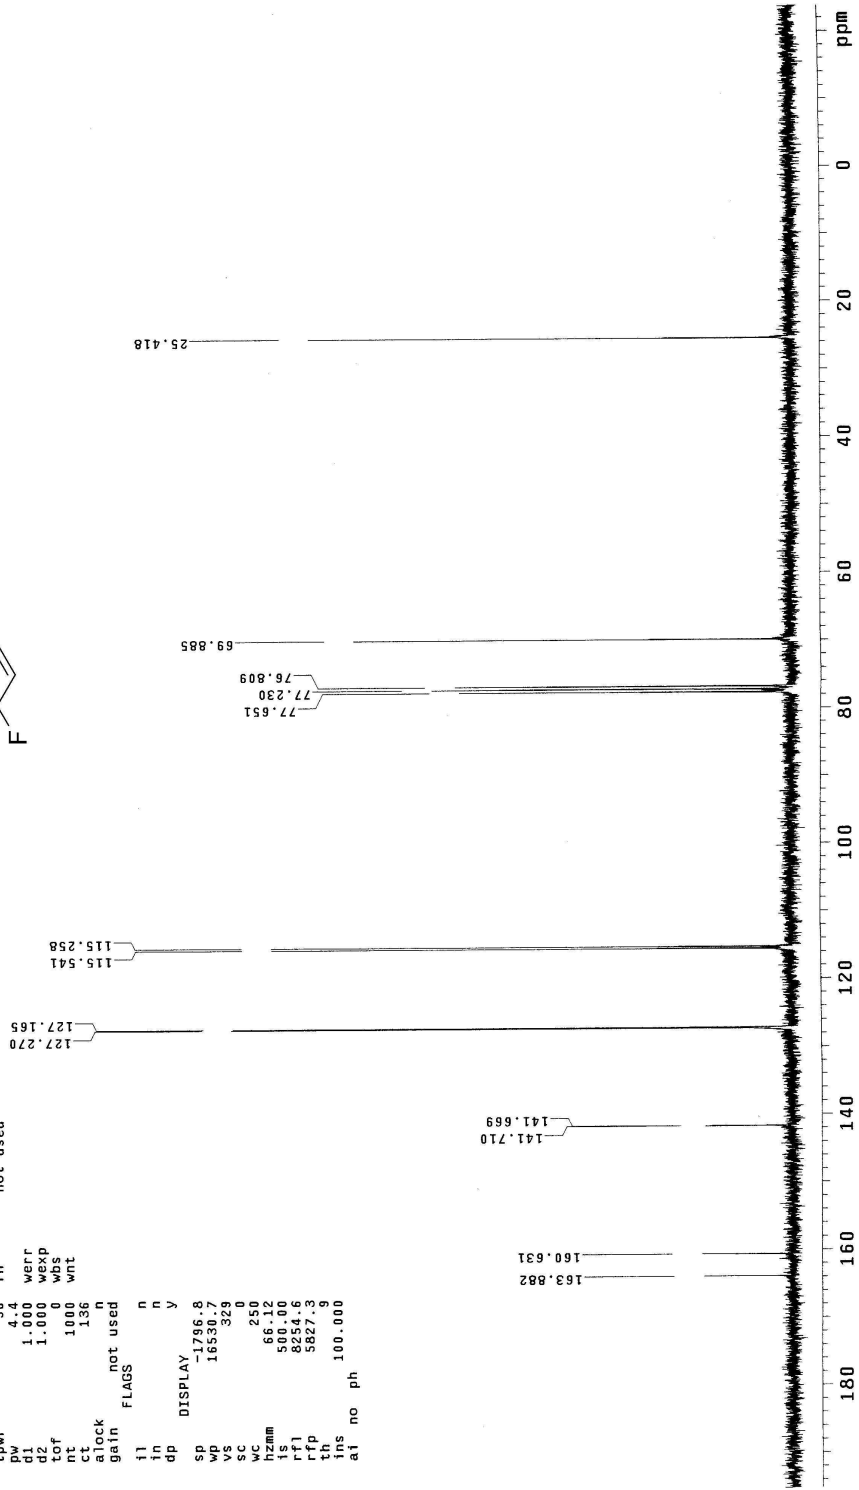

1ed-VII-159-29

expl std1h

date Oct 9 2007 DEC. & VT  
solvent CDC13 dfrq 300.078  
file ACQUISITION exp dpr 30 H1  
sfrq 300.078 dpr 30 H1  
tn 1.998 dmm 200 nnc  
at 20000 dmf dmf 200  
np 5005.0 wtfile ft  
sw not used proc not used  
bs 4 fn  
tpwr 58  
pw 7.02 werr  
to 2.000 wbsp  
tof 0 wbs  
nt 32 wnt  
ct 20  
alock n  
gain not used  
flags  
il n  
in n  
dp y  
SP DISPLAY -31.8  
wp 3097.5  
vs 160  
sc 0  
wc 250  
hzmm 12.39  
ls 500.00  
rfi 945.9  
tpp 8  
tms ins  
nm cdc ph 100.000

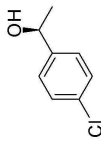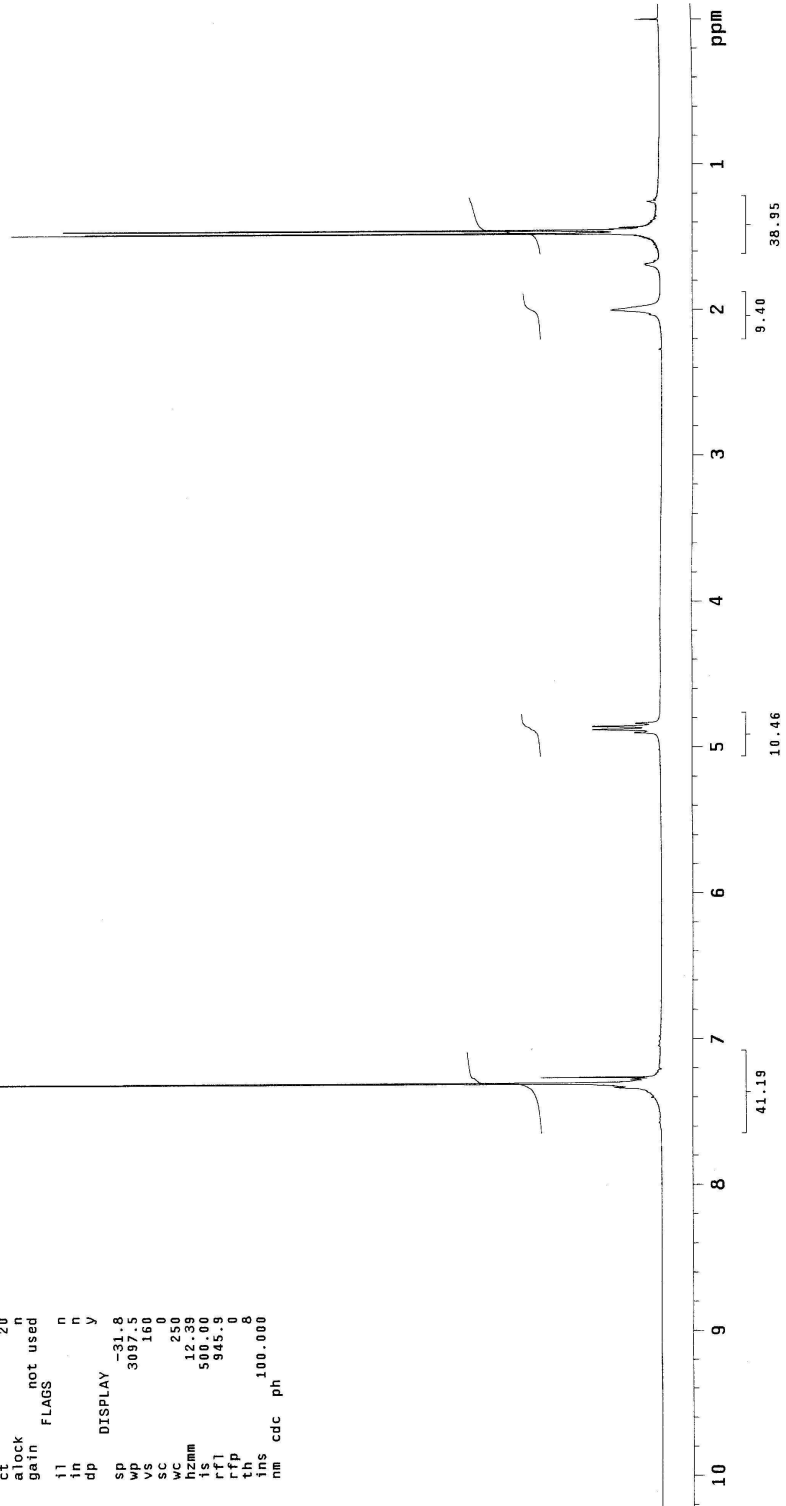

led-vii-159-29-C13

expl std13c

SAMPLE DEC. & VT  
date Oct 9 2007 dfrq 300.078  
solvent CDC13 dn H1  
file exp 37  
ACQUISITION  
sfrq 75.462 dm nyv  
at 1.000 dmf 10400  
np 40000.0 lb PROCESSING 1.00  
sw 20000.0 not used wtfile  
bs 4 proc ft  
tpwr 56 fn not used  
pw 4.4  
d2 1.000 werr  
tcf 1.000 exp  
tof 0 wst  
nt 1000 wnt  
ct 164  
alock n  
gain not used  
FLAGS  
ll n  
in n  
dp n  
DISPLAY y  
SP -1085.7  
WP 14586.0  
VS 359  
SC 0  
WC 250  
HZMM 56.34  
FS 500.00  
SI 800.00  
RFI 5627.3  
THP 5627.3  
TNS 100.000  
AI no ph

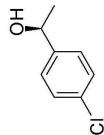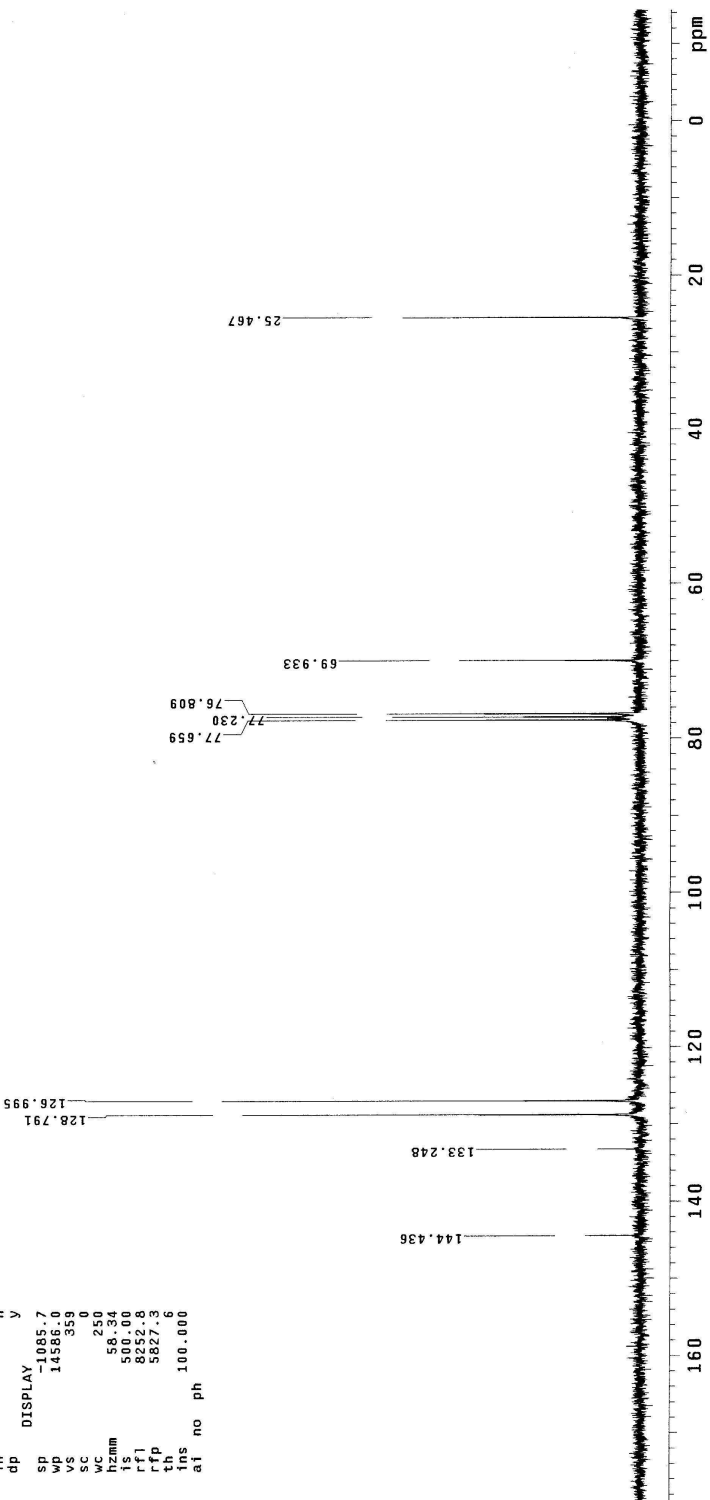

led-VII-161-59

exp1 std1h

date 9 2007 DEC. & VI  
file Oct CDC13 dn 300.078 HI  
solvent file exp dpwr 30  
ACQUISITION dof 0  
sfrq 300.078 dm nnn C  
tp 1.491 dmm  
nt 2000.0 dmf  
sw 5005.0 wfile  
bs not used proc ft  
fn 4 not used  
tpwr 58  
pw 7.2 weff  
dl 2.000 wepp  
tof 0 wbs  
ct 36 wnt  
atlock 16  
gain n  
not used  
SP 117.3  
VS 2891.7  
SC 420  
WC 250  
hzmh 11.21  
is 500.00  
rf1 945.9  
rfp 0  
rhc 26  
rhc 26  
nm cdc ph 1.000

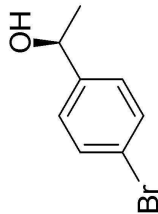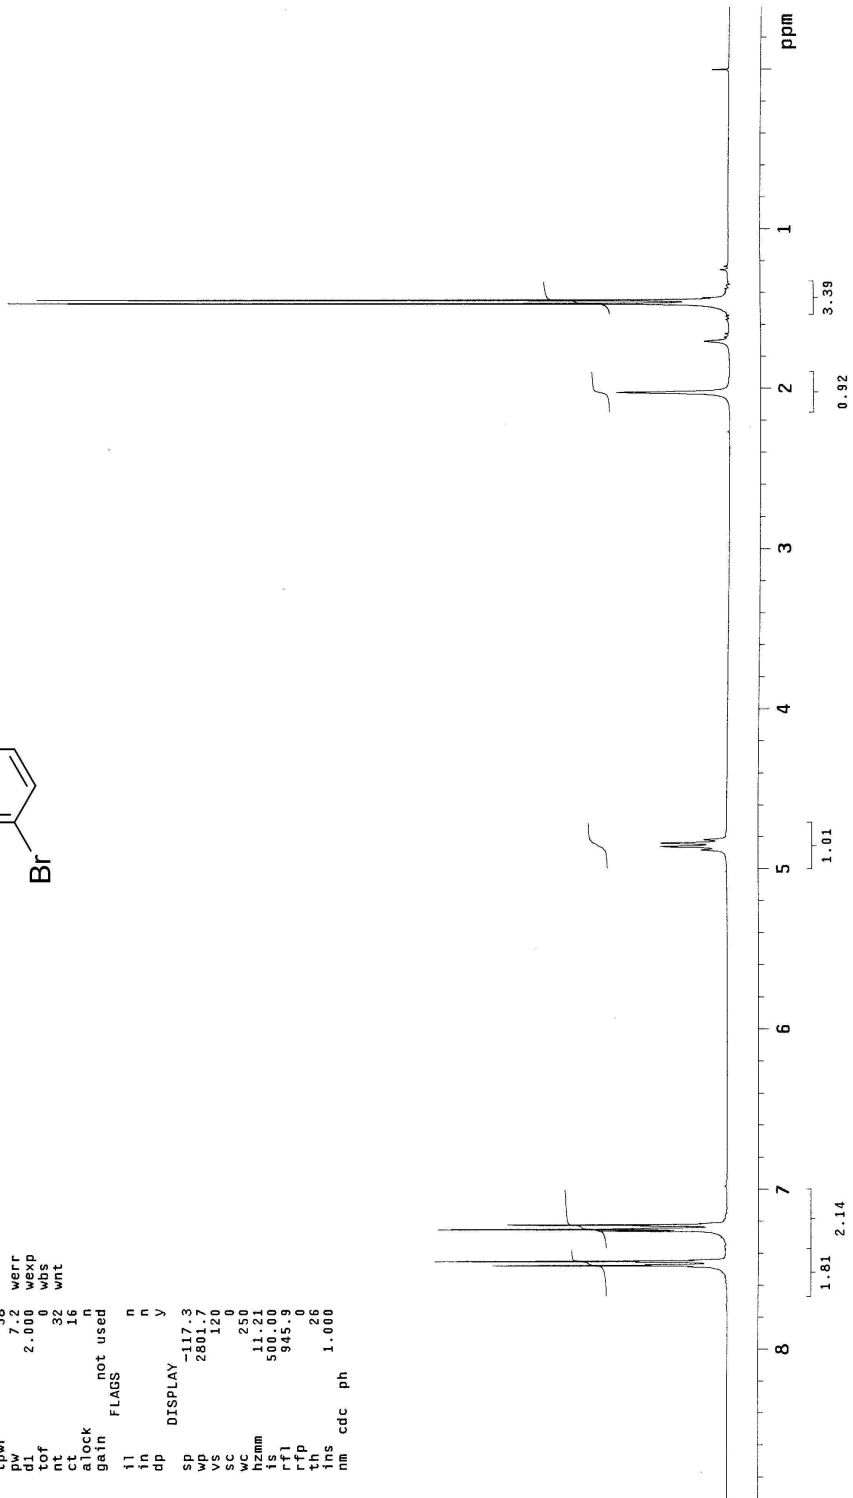



1ed-VII-161-59-C13

expl std13c

SAMPLE DEC. & VT  
date Oct 9 2007 dfrq 300.078  
solvent CDCl3 dn 37  
file CDC13 exp 37  
ACQUISITION exp dpwr 0  
sfrq 75.482 dm nuv w  
cp 1.00 dnm 10400  
pp 40000 dnr PROCESSING 1.00  
sw 20000.0 lb  
fb not used wfile  
bs 4 proc ft  
tpwr 56 fn not used  
pw 4.4  
p2 1.000 werr  
d2 1.000 wexp  
tof 0 wds  
nt 1000 wnt  
ct 72  
alock not used  
gain n  
FLAG n  
f1 n  
f2 n  
f3 n  
f4 y  
DP DISPLAY  
sp -1687.5  
wp 17555.5  
vs 359  
sc 0  
wc 250  
fzmm 70.52  
fzmm 50.56  
rf1 2423.0  
rfp 0  
th 11  
ins no  
a1 no ph 100.000

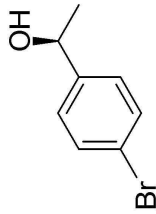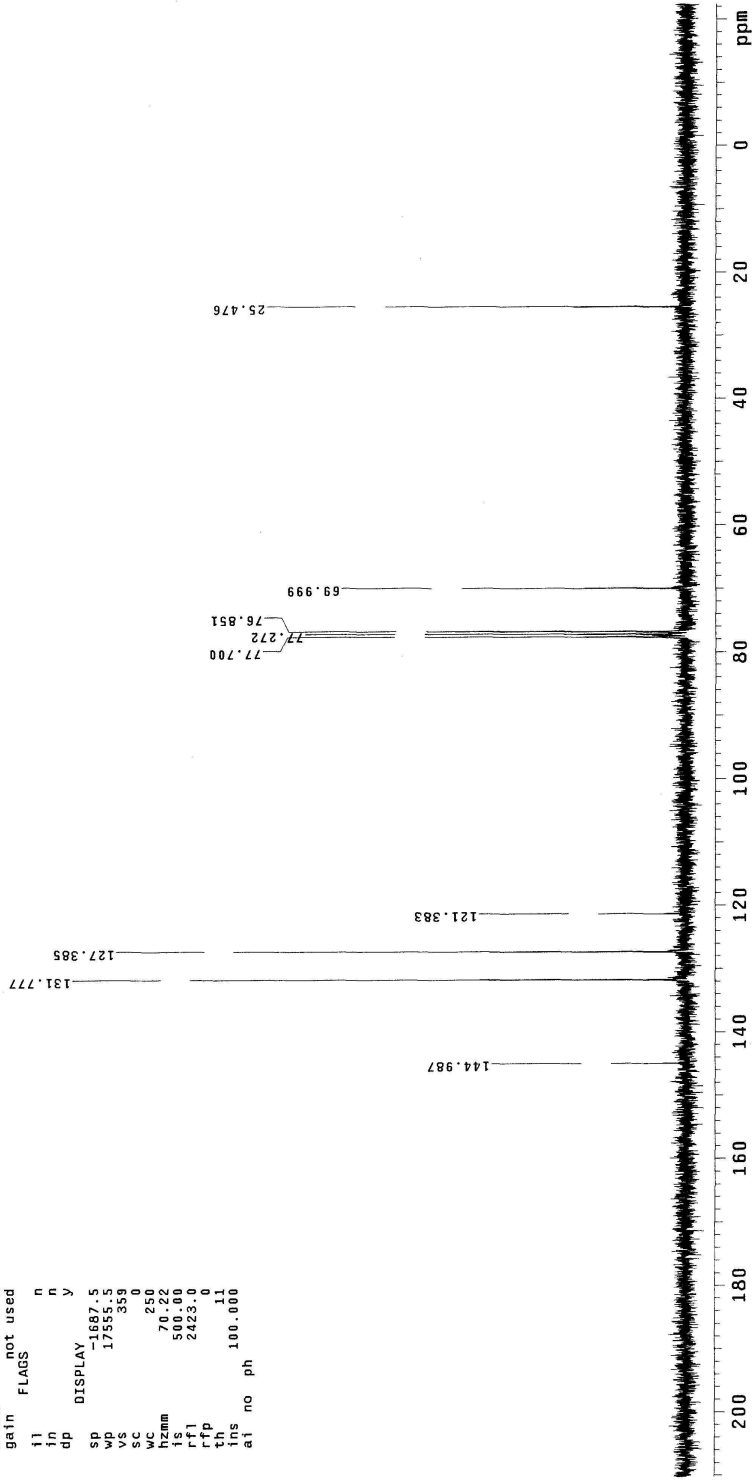

```

exp1 stdih
SAMPLE DEC. & VT
date Sep 19 2007 dfrq 300.078
solvent CDCl3 dn H1
file ACQUISITION exp dpr 30
sfrq 300.078 dm nnn
tn H1 dmf 200
at 1.998 dmf PROCESSING
np 20000 wf 5005.0 wf file
fb not used proc not used
ds 54 fn
dpr 52 weff
d1 72 wexp
nt 0 wbs
ct 32 wnt
gain not used
alock n
flags n
in n
in y
dp y
DISPLAY -25.4
sp 2887.0
wp 73
vs 0
sc 0
wc 11.50
hzmm 50.00
rf1 945.9
rfp 0
th 6
ins 1.000
nm cdc ph

```

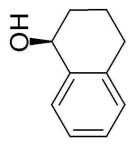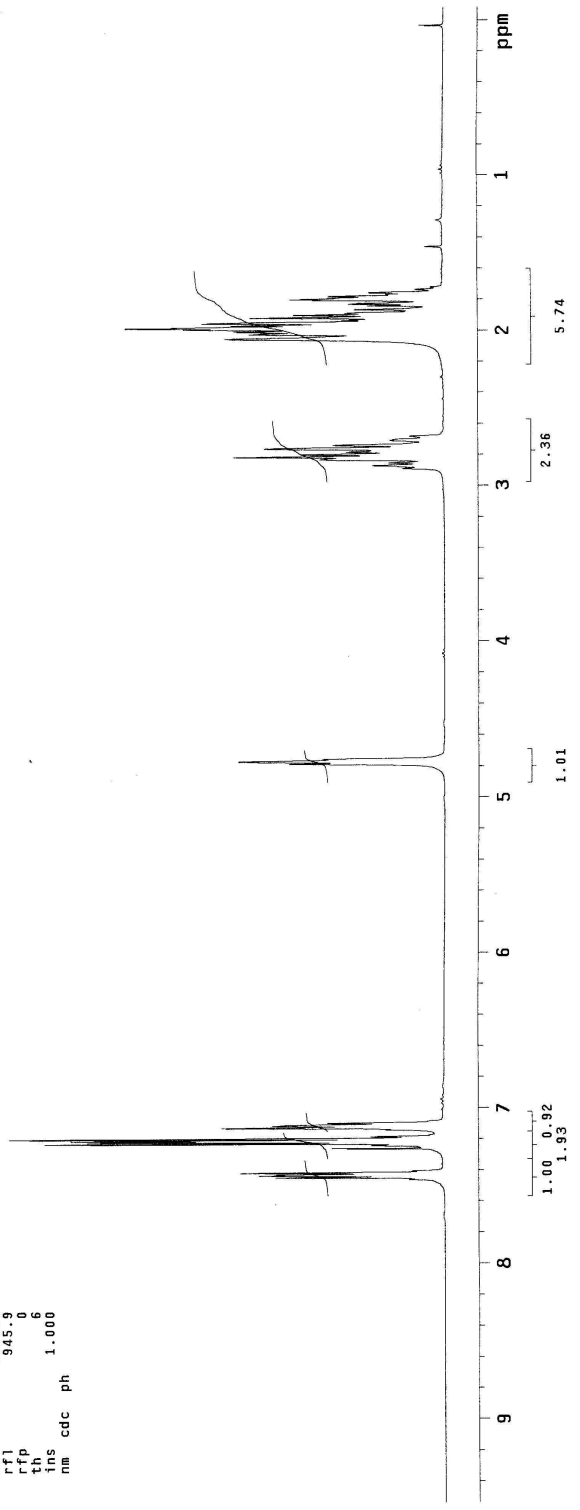

```

expl stdi3c
SAMPLE          DEC. & VT
date Sep 19 2007 dfrq 300.078
solvent CDCl3  dn 37
file ACQUISITION exp 37
          dof 0
          dof nvy
sfrq 75.462 dm nvy
tn C13 dmm
at 1.000 dmr 10400
pp 20000.0 lb PROCESSING 1.00
pw not used wfile
bs 4 proc ft
tpwr 56 fn not used
pw 4.4
d1 1.000 werr
d2 1.000 wexp
tof 0 wbs
ct 100 wnt
4
alock n
gain not used
          FLAGS
il n
in n
dp DISPLAY y
sp 1186.2
wp 14901.0
vs 160
sc 0
wc 250
hzmm 59.60
ls 500.00
rfj 8259.3
tpp 5827.3
ins
ai no ph 100.000

```

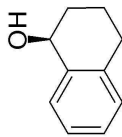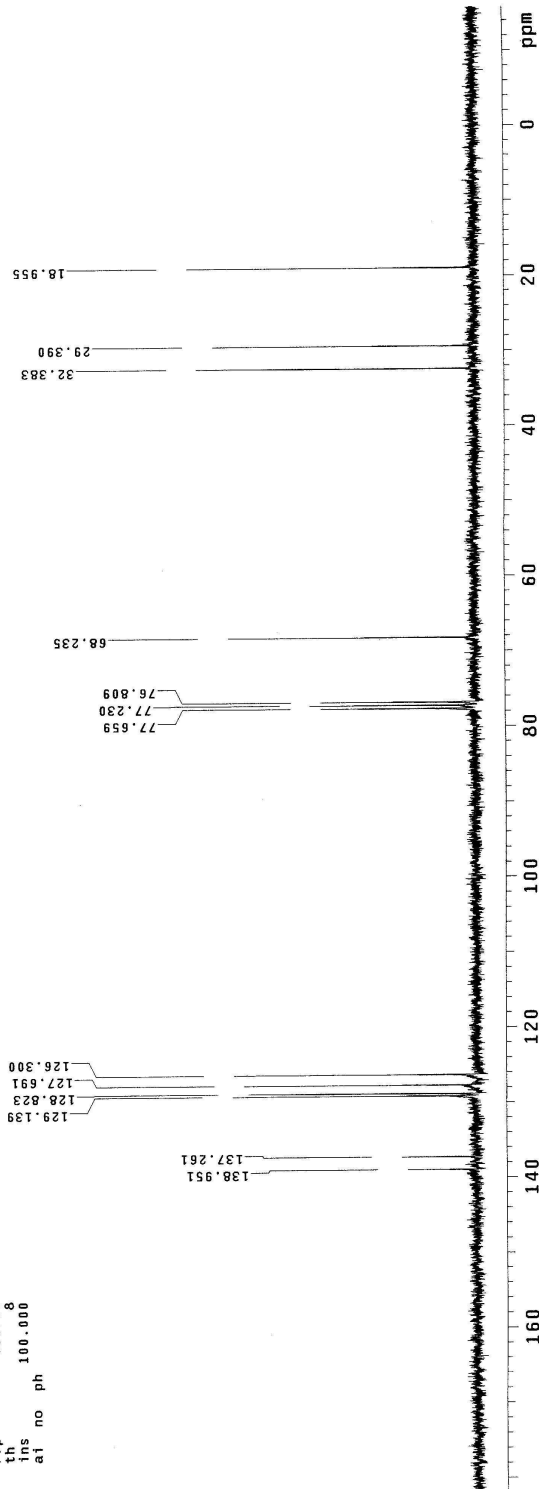

1ed-VII-140-29

expl std1h

SAMPLE DEC. & VT  
date Oct 1 2007 dfrq 300.078  
solvent CDCl3 dn H1  
file exp dpwr 30  
ACQUISITION dof 0  
sfrq 300.078 dm nnn  
tn H1 dmm 200 C  
at 1.998 dmt PROCESSING  
pw 5000 wf file  
fs not used d proc ft  
bs not used 4 fn not used  
tpwr 58  
pw 7.2 werr  
dl 2.000 wexp  
tof 0 wbs  
nt 32 wnt  
ct 24  
rlock n  
gain not used  
il n  
in n  
dp y  
SP DISPLAY -84.4  
wp 3031.8  
vs 89  
wc 250  
hzmm 12.13  
ls 500.00  
rfl 945.9  
rfp 0  
th 5  
ins cdc 1.000  
nm cdc ph

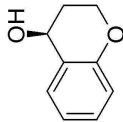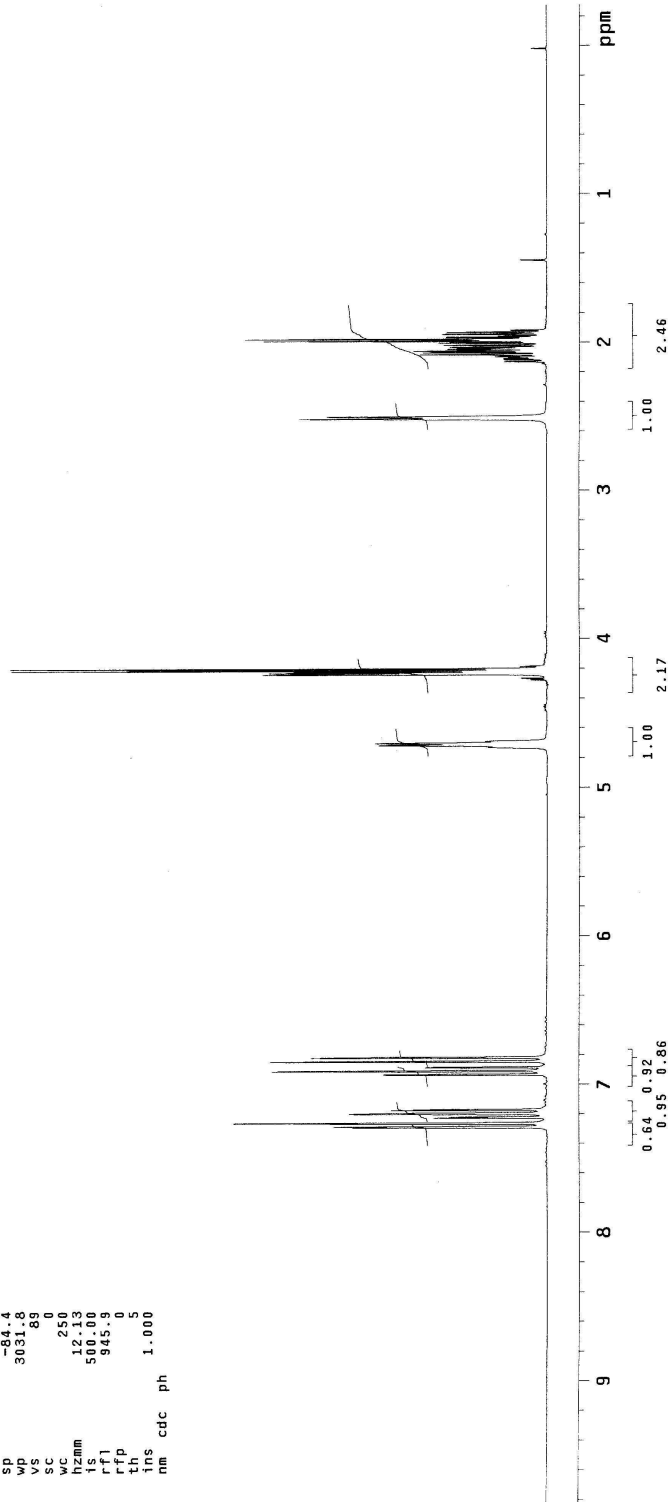

```

expl std13c
SAMPLE DEC. & VT
date Oct 1 2007 dfrq 300.075
solvent CDCl3 n
File ACQUISITION Exp dpr 51
0 ddf 0
sfrq 75.462 dm nvv w
tn C13 dmm 10400 w
at 1.000 dmf 1.000
np 40000 lb
sw 20000.0 lb PROFILE 1.00
bs not used
ps 4 PROC
tpwr 56 fn not used
pw 4.4
d1 1.000 werr
d2 1.000 wexp
tof 0 wbs
nt 1000 wnt
clock 168
gain not used
FLAGS n
ll n
in n
dp DISPLAY -13.8
sp 15137.8
ws 154
sc 0
wc 250
hzmm 60.55
ls 500.00
rfi 8259.3
tpp 3827.8
ins ai no ph
ai 100.000

```

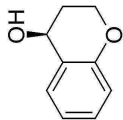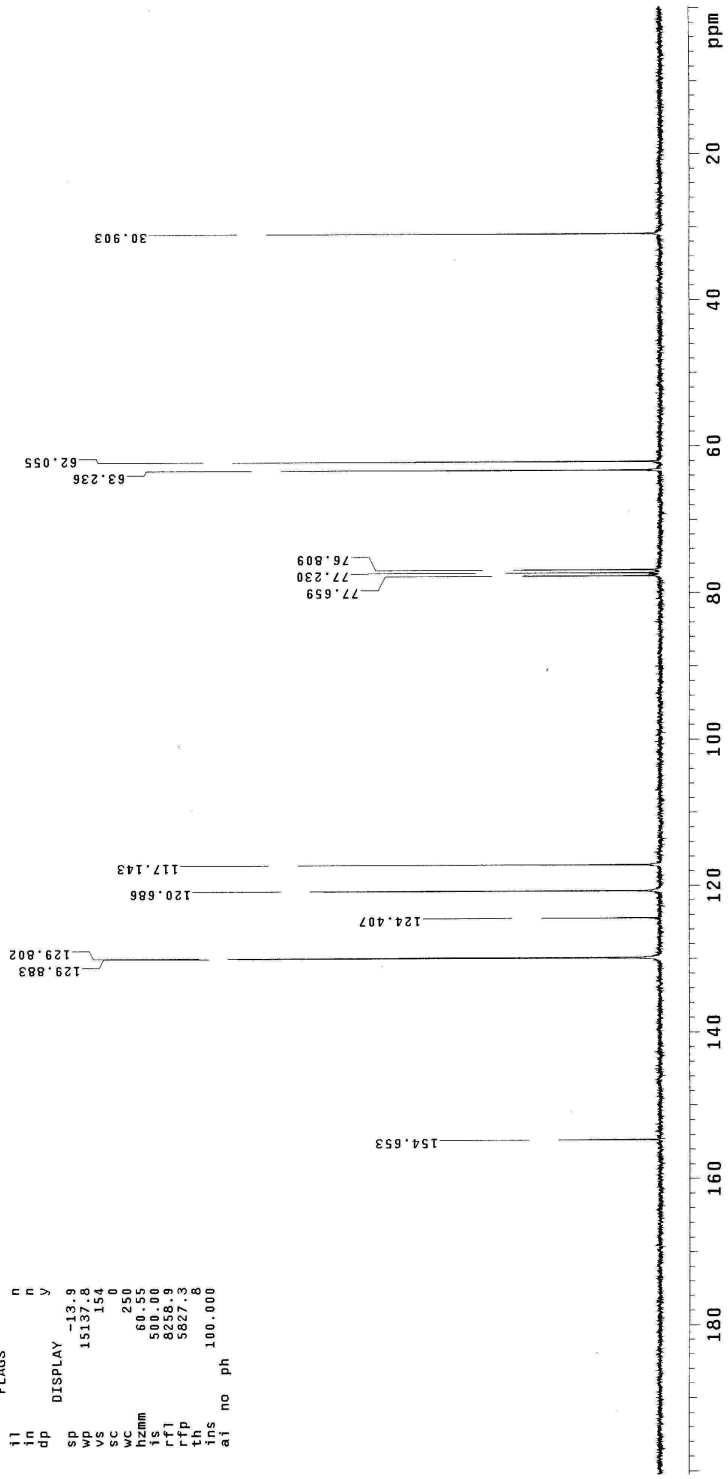

led-VII-142-29

exp1 std1h

```
SAMPLE DEC. & VT
date Oct 1 2007 dfrq 300.078
solvent Oct CDC13 dn H1
file ACQUISITION exp dpr 30
sfrq 300.078 dn 0
tn H1 dmm nnc
at 1.998 dmf 200
np 20000 wtfile
sw 5005.0 proc ft
fb not used fn not used
bs 4
tpr 52 wepr
dl 2.000 wexp
tof 0 was
nt 32 wnt
ct 28
alock n
gain not used
jl n
in n
dp n v
DISPLAY
sp -176.6
wp 3136.9
vs 68
sc 0
h2mm 250
is 12.55
rfl 733.67
rfp 945.9
th 0
lms 9
nm cdc ph 1.000
```

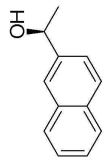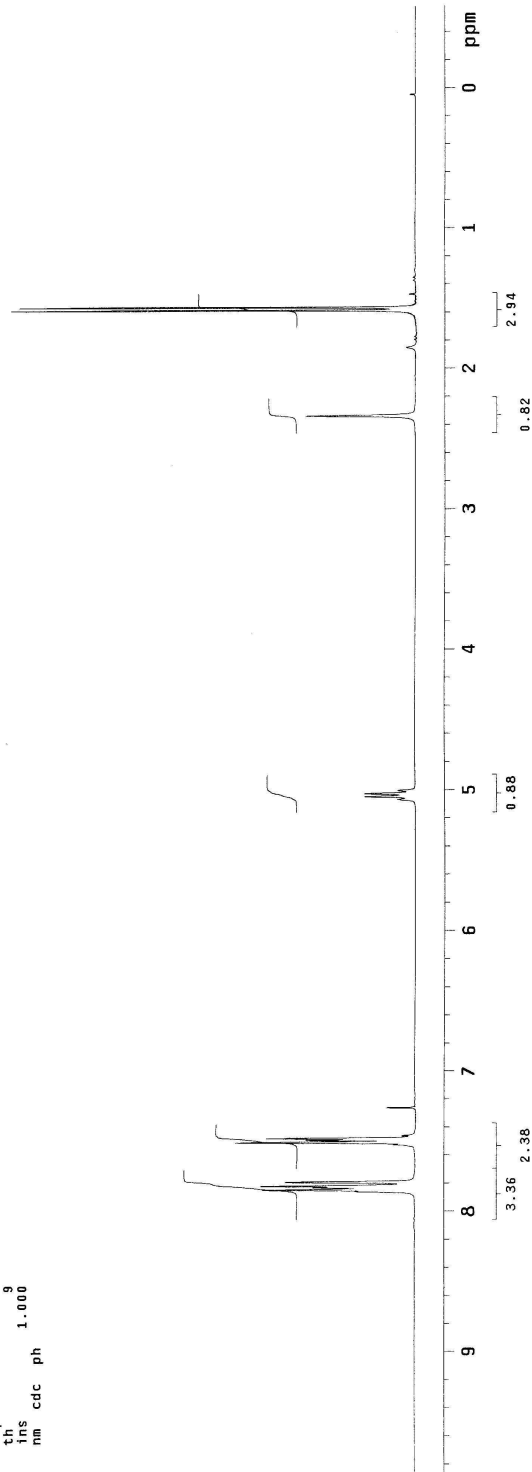

1ed-VII-142-29-C13

exp1 std13c

SAMPLE DEC. & VI  
date 1 2007 dfrq 300.078  
solvent Oct CDC13 dn H1  
file exp 37  
ACQUISITION dpwr 0  
sfrq 75.462 dm ny  
t 1.000 dm 10400  
at 1.000 dmf PROCESSING  
np 40000 lb 1.00  
sw 20000.0 wtfile  
fb not used  
bs 4 proc  
tpwr 56 fn not used  
pw 44  
d1 1.000 werr  
d2 1.000 wexp  
tof 0 wbs  
nt 1000 wnt  
ct 132  
alock n  
gain not used  
il n  
in n  
ip n  
dp DISPLAY V

sp -118.9  
wp 13876.2  
vs 246  
vc 250  
hzm 55.50  
is 500.00  
rfl 8258.9  
rfp 5827.3  
th 8  
sh 8  
at no ph 100.000

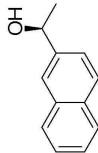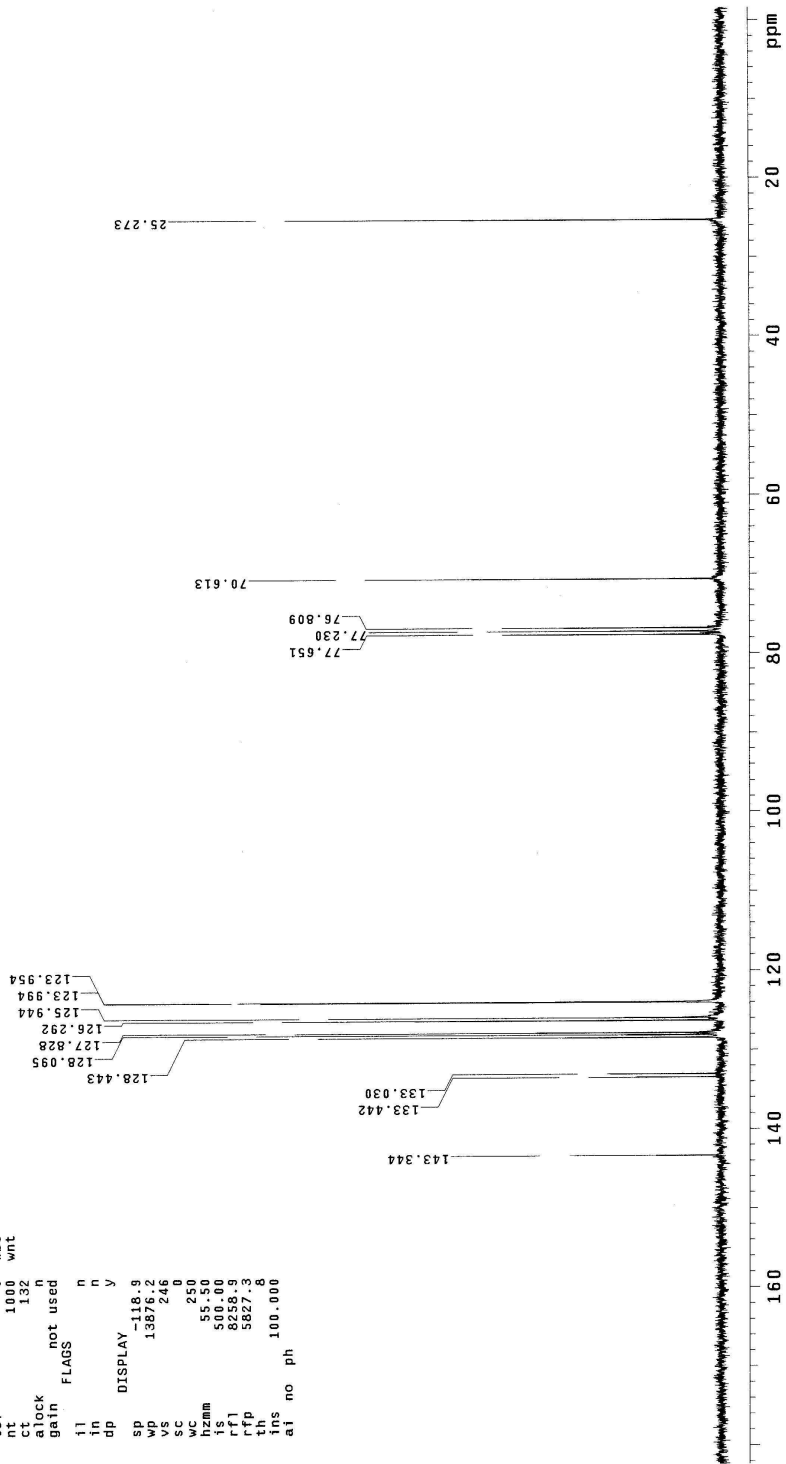

led-VII-133-29

```
exp1 stdih
SAMPLE
date Sep 22 2007 dfrq DEC. & VT 300.078
solvent CDCl3 dn HI 30
file CDC13 exp 30
ACQUISITION exp 0
sfrq 300.078 dm nnn c
at 1.998 dm
cp 500.00 dmf PROCESSING 200
fb not used wtf file
bs not used proc
tpwr 58 fn not used
pw 7.2 werr
dl 2.000 wexp
nt 0 wbs
ct 32 wnt
20
atlock
gain not used
FLAGS
il n
in n
dp y
sp -123.8
wp 2545.1
cs 93
vc 250
hzmm 10.18
fs 500.00
rfl 945.9
rfp 0
th 6
ins 1.000
nm cdc ph
```

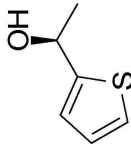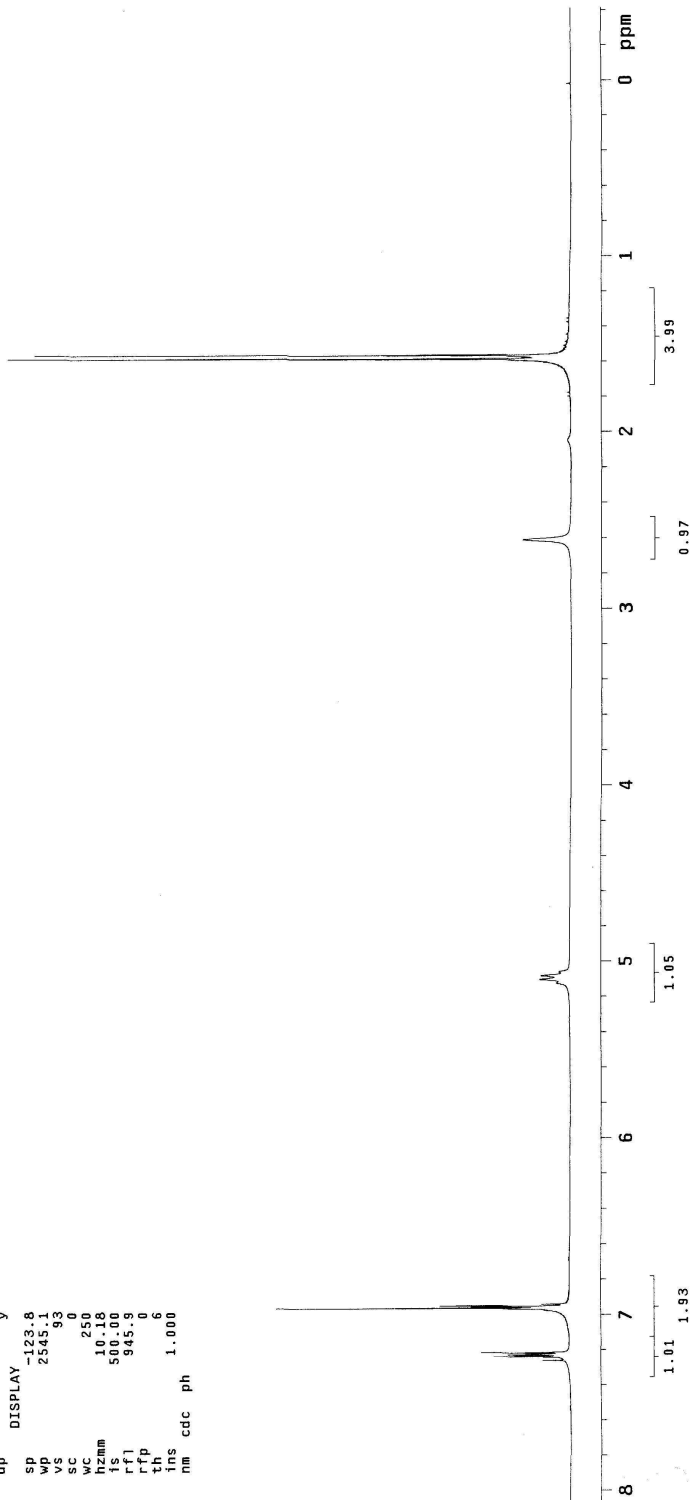



led-VII-133-29-C13

expl std13c

DEC. & VT  
date Sep 22 2007 dfrq 300.078  
file C:\MSDCHEM\133-29-C13.d  
f1 file C:\MSDCHEM\133-29-C13.d  
ACQUISITION Exp 37  
SFRQ 75.462 dm nvv 0  
tn C13 dm dmm 10400 w  
at 1.000 dmf 1.000  
sw 20000.0 lb PROCESSING  
bd not used wrfile 1.00  
hd not used fproc ft  
tpwr 56 fn not used  
pw 4.4  
d1 1.000 werr  
d2 1.000 wexp  
tof 0 wbs  
nt 1000 wnt  
ct 136  
alock n  
gain not used  
il n  
in n  
dp DISPLAY y  
sp -145.8  
wp 14769.7  
vs 244  
vc 250  
hzmm 59.08  
ls 500.00  
rf1 8259.5  
rfp 5827.3  
th 11  
ins 100.000  
at no ph

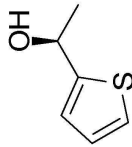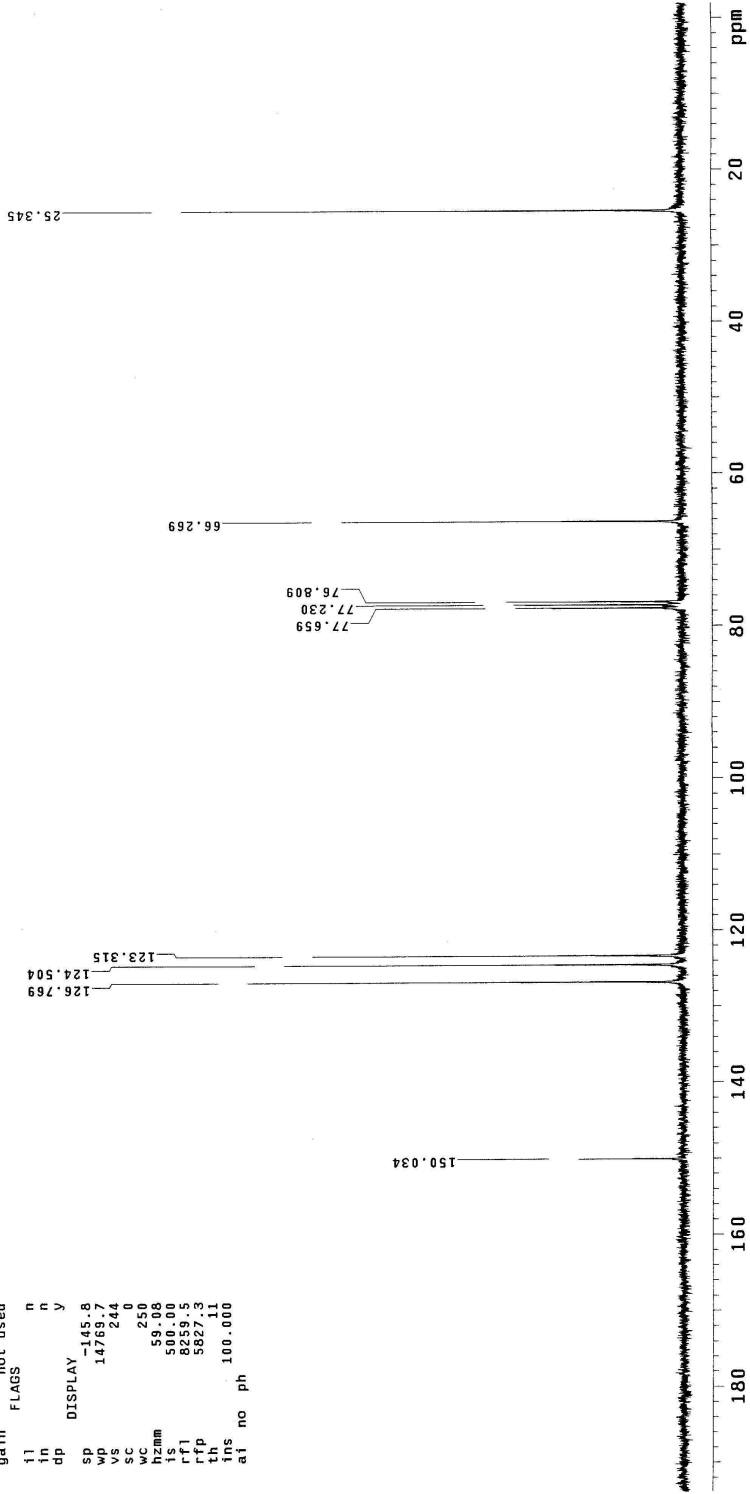

led-VII-229-19

expl stdih  
SAMPLE DEC. & VT  
date NOV 29 2007 dfrq 300.078  
solvent CDCl3 dn 30  
file CDC13 exp 30  
ACQUISITION  
sfrq 300.078 dm nnn  
tn 1.00 dmm c  
at 2006 wifile 200  
sw 5085.0  
fb not used proc ft  
bs 4 fn not used  
tpwr 58  
pw 7.2 werr  
ds 2.000 wexp  
nt 32 wnt  
ct 28  
alock n  
gain not used  
flags  
il n  
in n  
dn y  
DISPLAY  
sp -44.9  
wp 2801.7  
vs 288  
sc 0  
ss 250  
hzmm 11.21  
ls 500.00  
rfi 945.9  
rfp 0  
th 15  
ins 1.000  
nm cdc ph

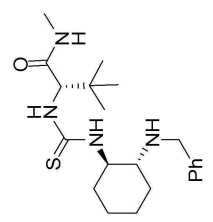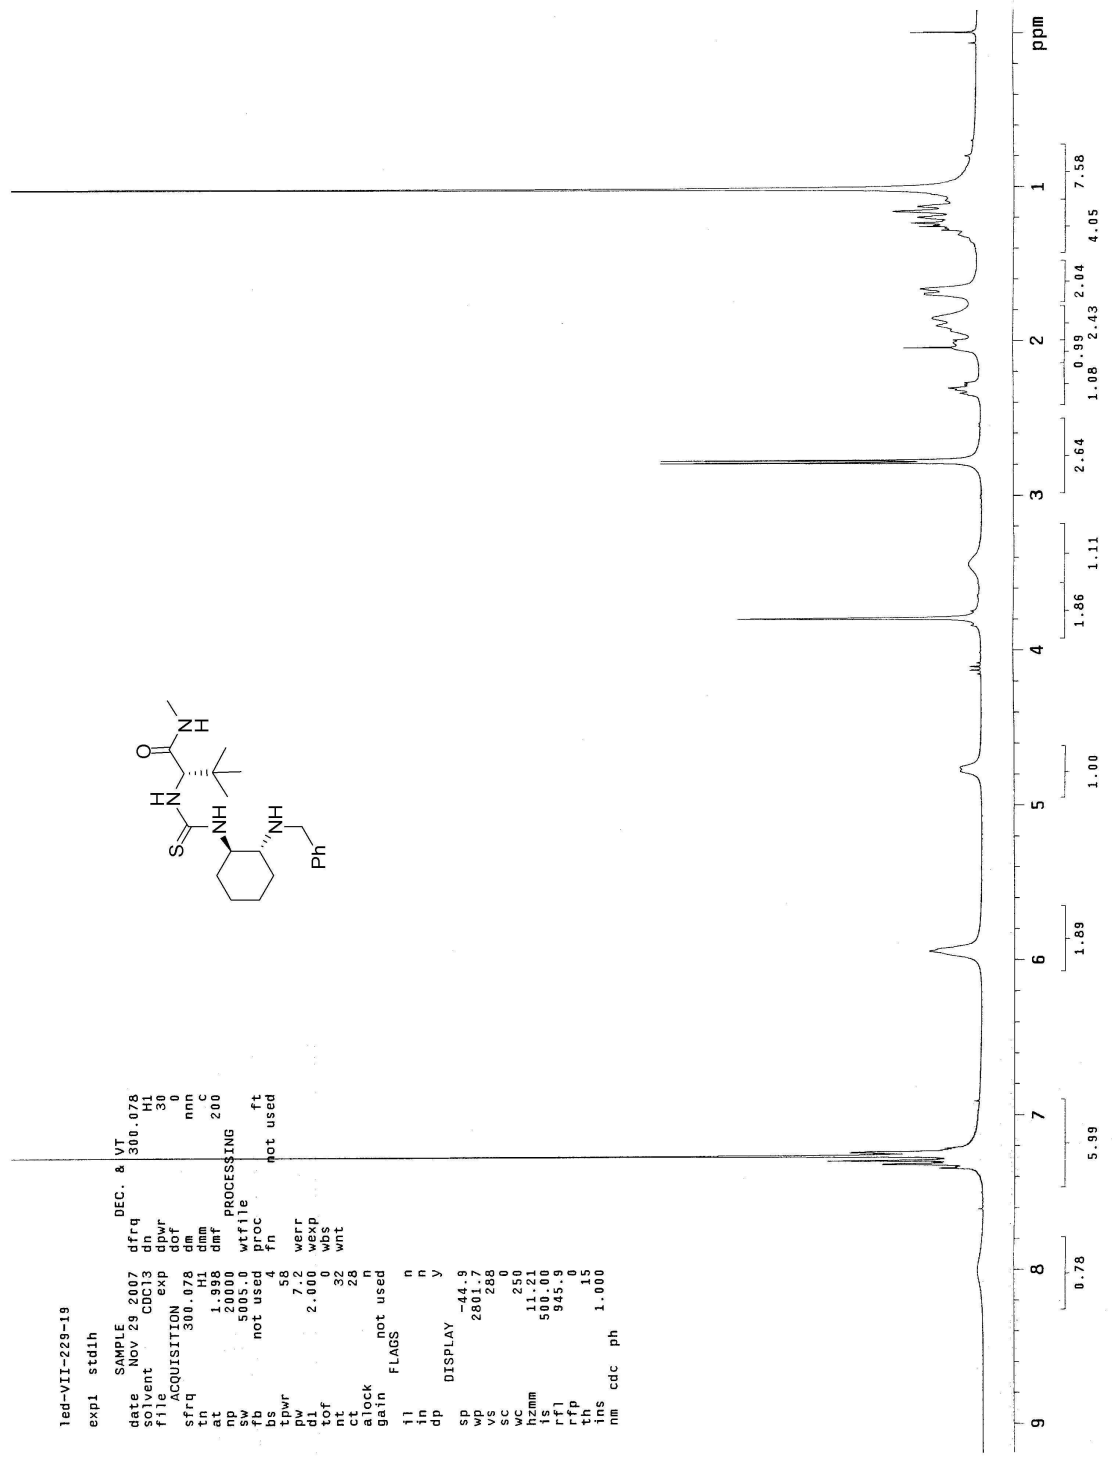

led-VII-229-19-C13

exp1 std13c

date Nov 29 2007 dfrq DEC. & VT 300.078  
solvent COCl3 dn HI  
file ACQUISITION exp dpwr 57  
sfreq 75.462 dm nvy  
tn 75.462 dnm 10400 w  
at 1.000 dmf PROCESSING 1.00  
np 48000.0 lb  
sw 20000.0 w  
bd not used wfile  
b0 100 wpc ft  
b1 156 fn not used  
tavr 4.4  
pw 1.000 werr  
d1 1.000 wexp  
d2 1.000 wbs  
tof 2000.0 wnt  
ct 13100  
ctt 13100  
atock n  
gain not used

fl n  
in n  
dp DISPLAY y  
sp -719.3  
wp 17388.0  
vs 2161  
sc 0  
wc 250  
is mm 68.59  
rfi 8252.2  
rfd 5855.1  
th 6  
ins 100.000  
al no ph

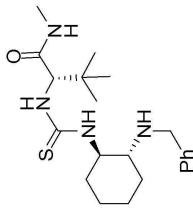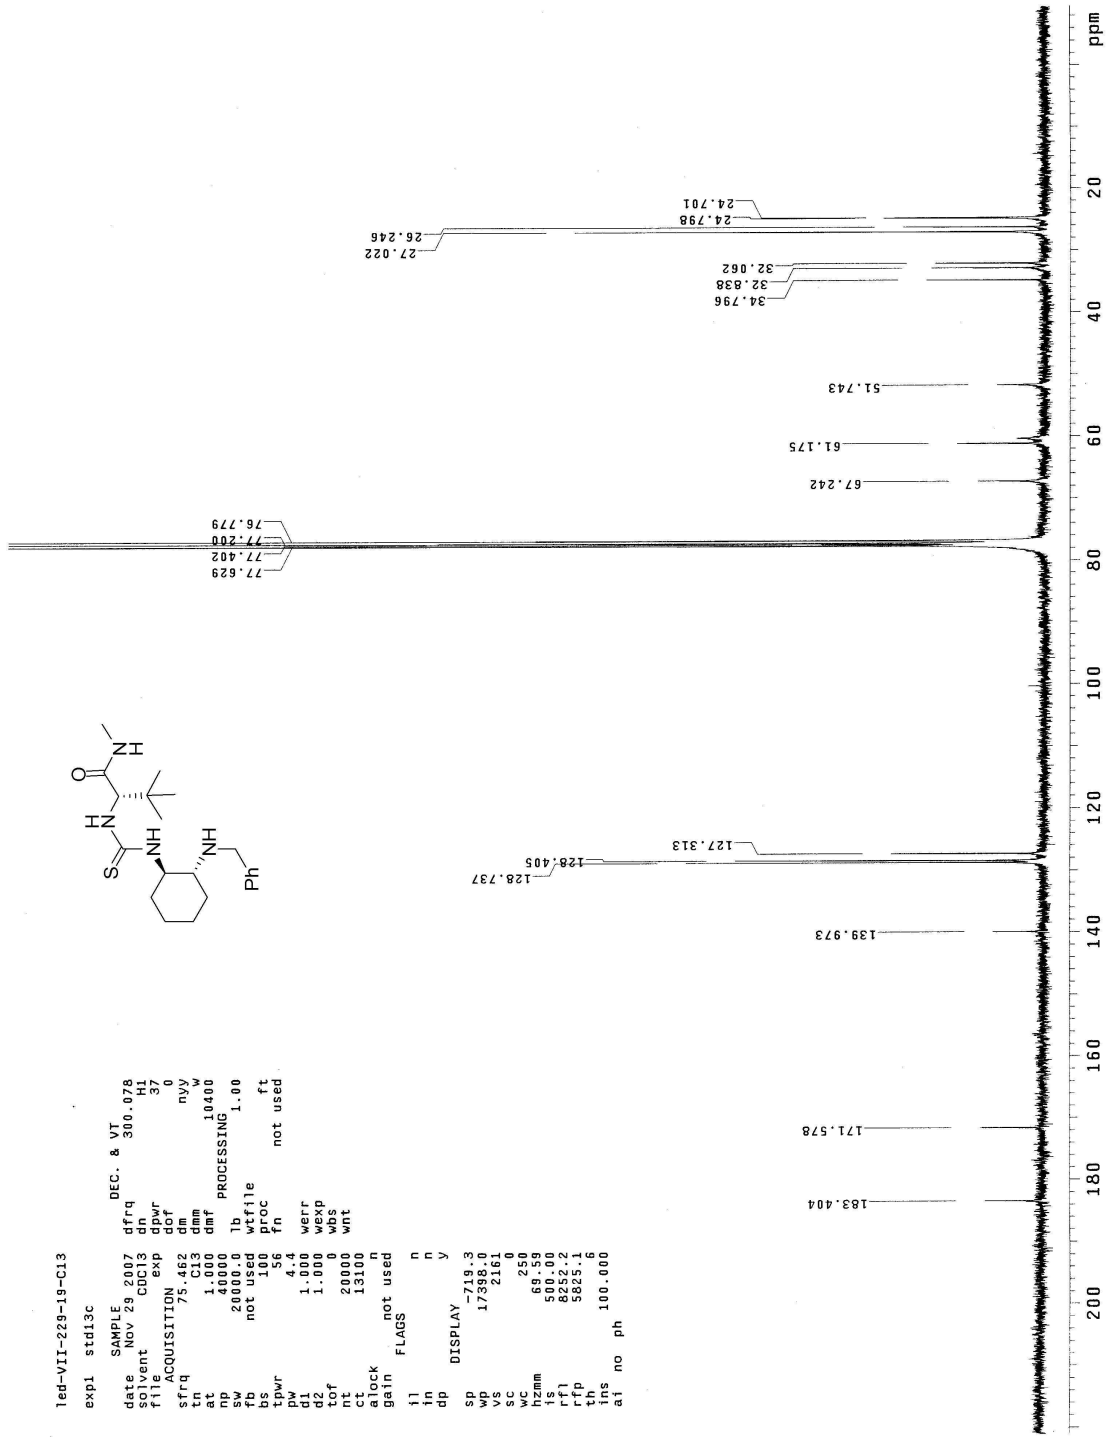

1ed-VII-261-18rt

expl Proton

|         |            |       |          |
|---------|------------|-------|----------|
| date    | Feb 8 2008 | temp  | not used |
| solvent | cdcl3      | gain  | not used |
| fl      | 1          | spin  | 0.20     |
| sv      | 6396.4     | psf   | 9.00     |
| at      | 3.000      | a1fa  | 6.800    |
| np      | 38378      | flags |          |
| fb      | 4000       | l1    | n        |
| bs      | 4          | in    | n        |
| ss      | 2          | dp    | y        |
| dl      | 1.000      | hs    | mn       |
| ct      | 20         | lb    | 0.20     |
|         |            | fb    | 65536    |
| tn      | 399.782    | h1    |          |
| sfrq    | 399.5      | sp    | -174.9   |
| tof     | 399.5      | wp    | 3640.3   |
| tpwr    | 54         | rfl   | 795.8    |
| pw      | 4.550      | rip   | 0        |
| dn      | 0          | tp    | 125.0    |
| gof     | 0          | lp    | 3.0      |
| dm      | mn         | wc    | 250      |
| dmm     | c          | sc    | 0        |
| dpwr    | 25         | vs    | 191      |
| dmf     | 29412      | th    | 2        |

SPECIAL

DISPLAY

PLOT

cdc ph

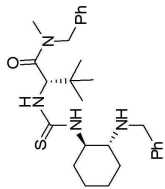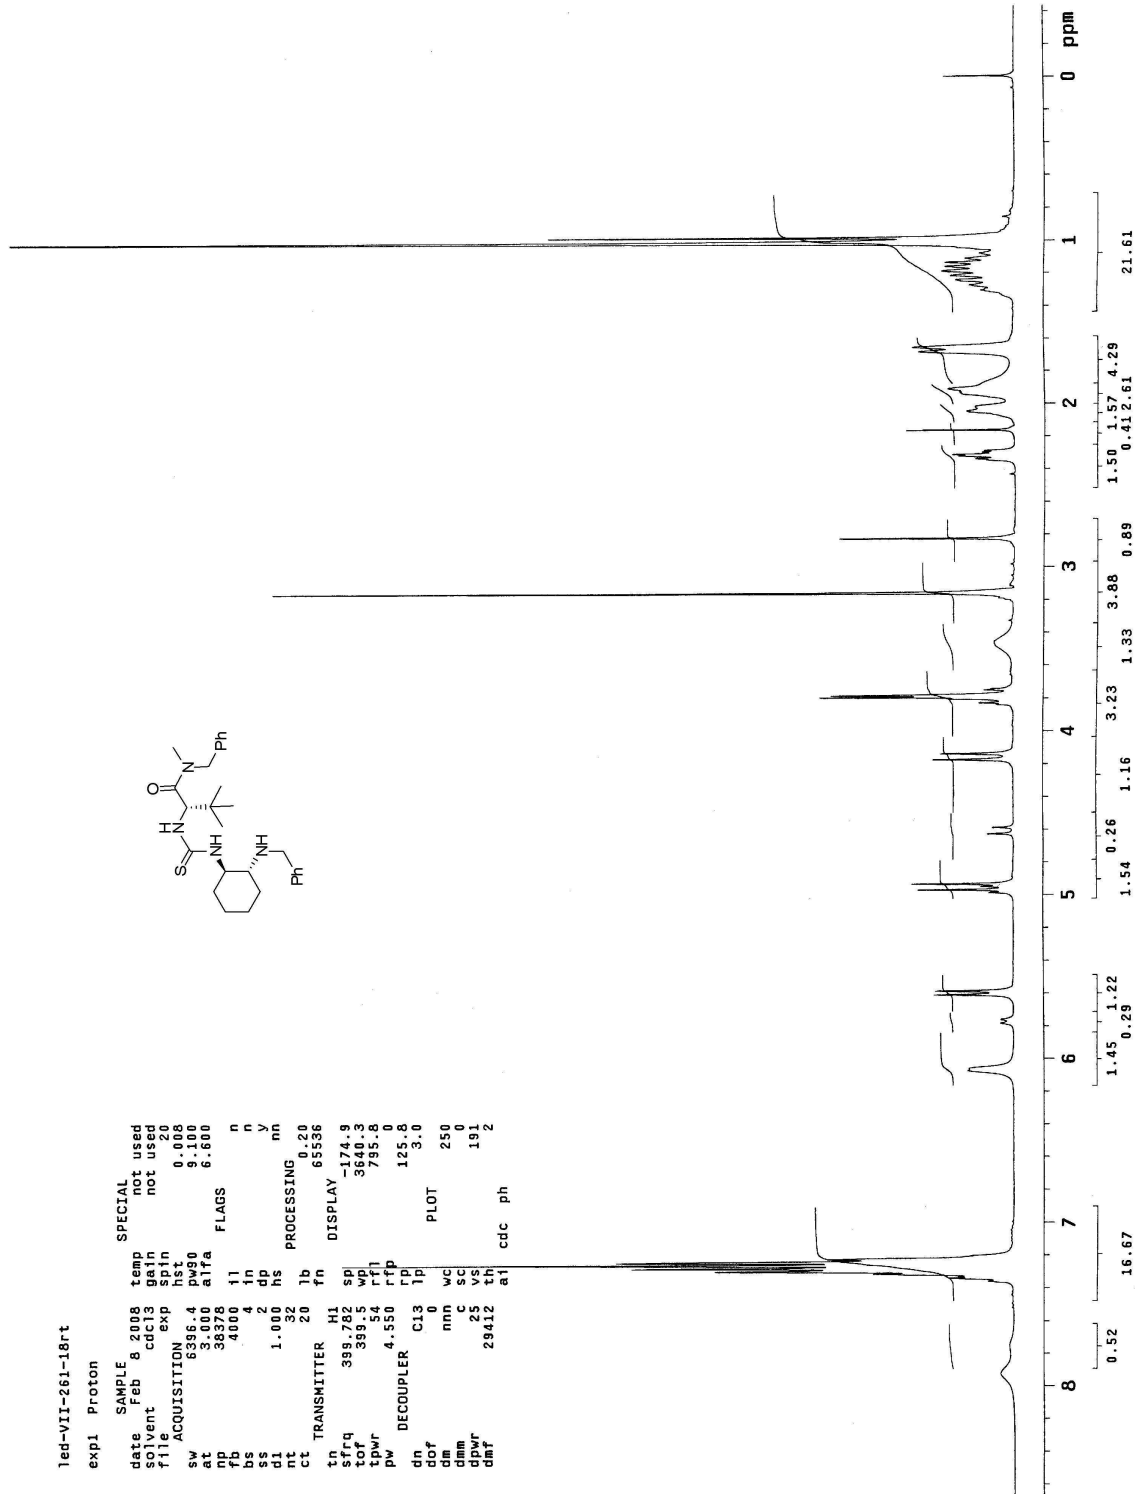

1ed-VII-261-18

expl std13c

```
date SAMPLE DEC. & VI
Feb 13 2008 dfrq 300.078
solvent CDC13 dn H1
file CDC13 exp 37
ACQUISITION exp 0
sfrq 75.462 dm nny
tn C13 dmm
at 1.000 dmf 10400 w
sv 20000 lb PROCESSING 1.00
fb not used wf file
bs 100 proc ft
tpwr 56 fn not used
pw 4.4 werr
di 0 wexp
d2 1.000 wexp
cof 20000 wds
ct 22500 wnt
alock n
gain not used
FLAGS n
f1 n
in n
dp DISPLAY -93.7
sp 17008.2
wv 956
vs 956
sc 0
wc 250
h2mm 66.04
ls 500.00
rfl 8254.0
tpp 3825.1
tms 100.000
af no ph
```

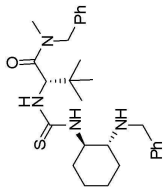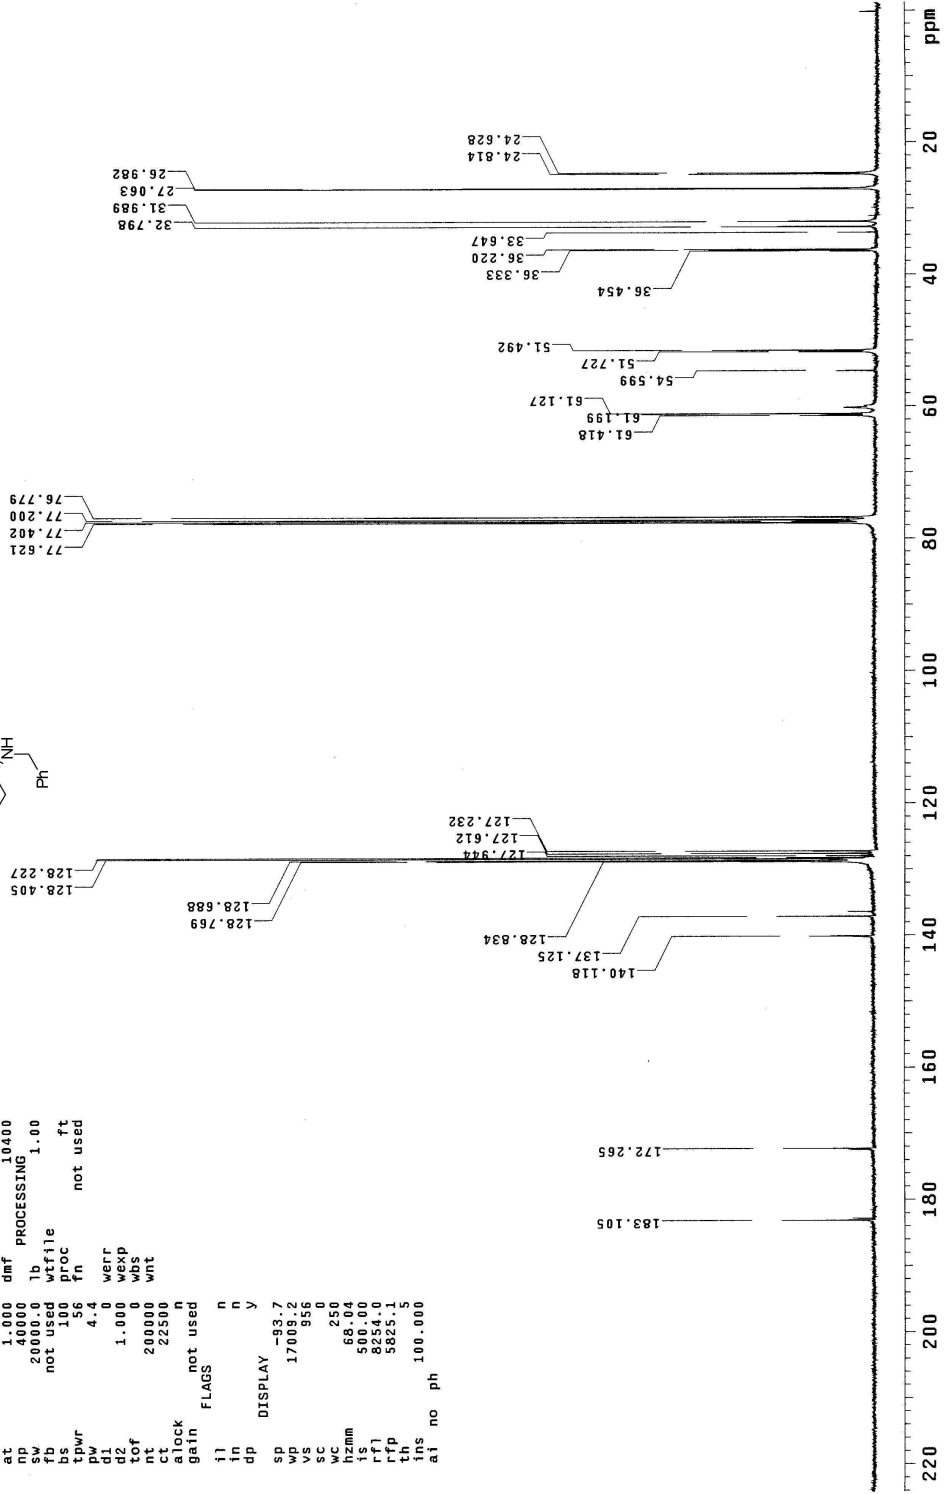

led-VII-271-18

exp1 stdih

```
SAMPLE          DEC. & VT
date            Feb 9 2008      dfrq          300.078
solvent         CDC13           dn            H1
fil            50              dpr          50
ACQUISITION    exp            dm            nnn
sfrq           300.078        dmf          c
tn             1.998          dmf          c
at            20000           wfile        PROCESSING 200
sp            5005.0          not used     proc         ft
fb            not used        tn           not used
ts            58
tswr          7.2            werr
dl            2.000          wexp
nt            0              wbs
ct            32             wnt
gain          24
alock        not used
flags        not used
ij           n
in           n
dp           y
DISPLAY      -77.9
sp           2740.3
wp           212
vs           0
sc           0
mc           55
mnm         10.96
ts           500.00
rf1         845.9
rfp         0
th         5
ins         3.000
nm         cdc
ph
```

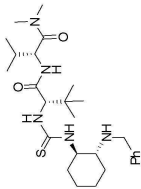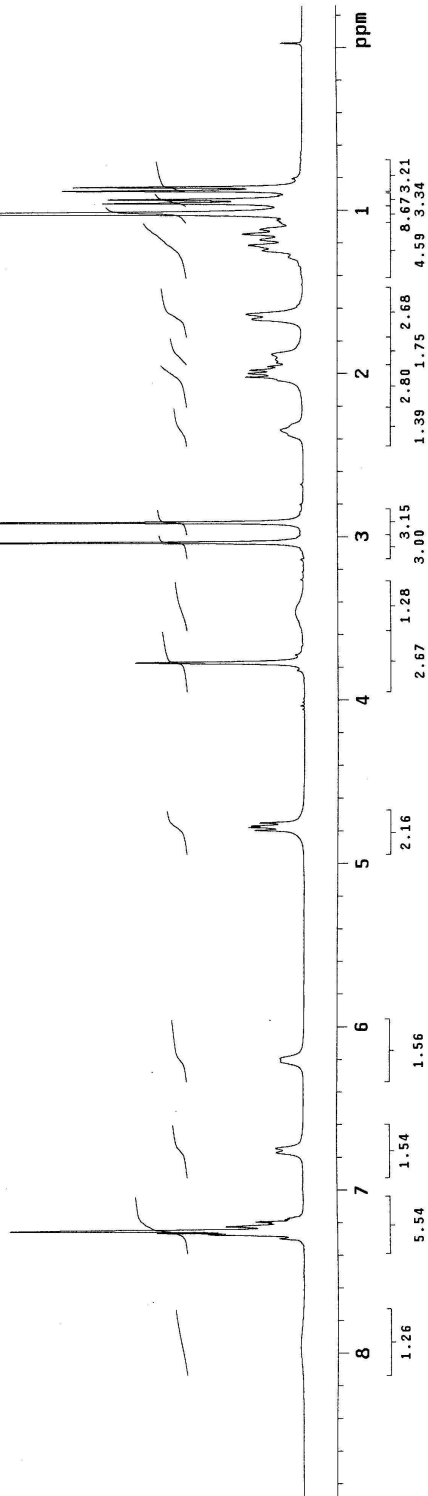

led-vii-271-18-C13

exp1 std13c

date SAMPLE DEC. & VT  
Feb 9 2005  
solvent CUC13  
P1 31  
ACQUISITION exp 31  
dfr 0  
dfr 0  
dm nvv  
sfrq 75.462 dm  
tn C13 dmm  
at 1.000 dmf 10400  
np 40000 lb PROCESSING  
sw 20000.0 wfile 1.00  
rs not used f1cc ft  
ls 56 f1cc not used  
tdwf 4.4  
d1 0 weff  
d2 1.000 wexp  
tof 0 wbs  
nt 2000 wnt  
ct 1024  
alock n  
gain not used  
FLAGS  
il n  
in n  
in n  
dp DISPLAY y  
sp -1907.7  
wp 19165.2  
vs 789  
vc 250  
bzmm 76.74  
ls 500.00  
rfl 8258.3  
rfp 5825.1  
th 5  
ins 100.000  
at no ph

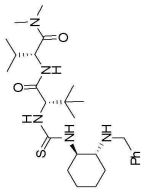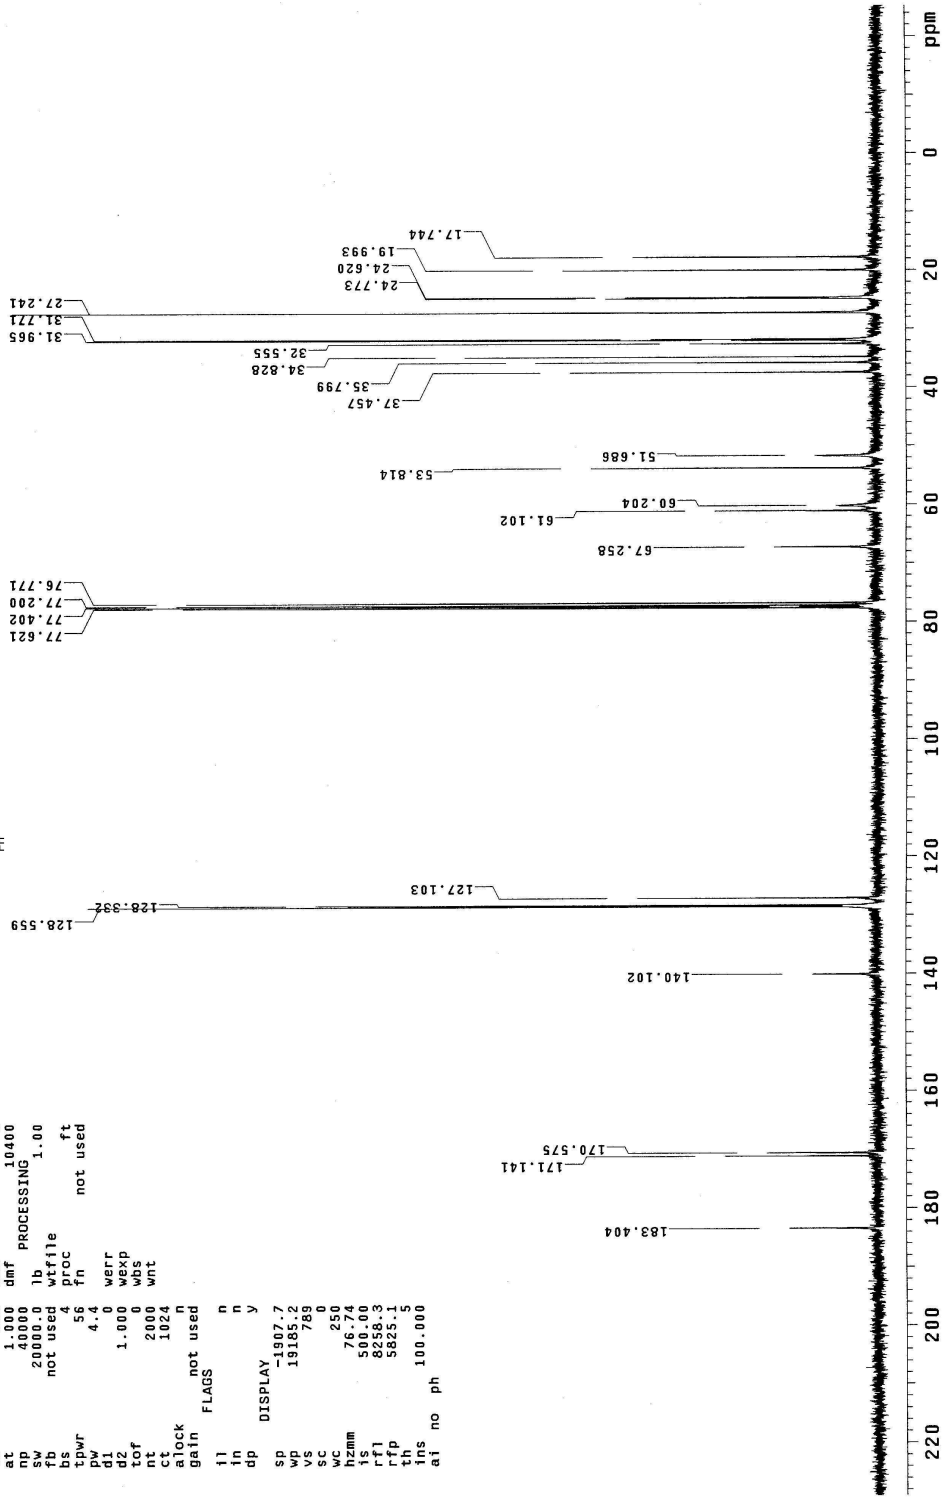

led-VII-109-r

expl stdih

SAMPLE DEC. & VT  
date Sep 14 2007 dfrq 300.078  
solvent CDCl3 dn H1  
file CDC13 exp 30  
ACQUISITION exp 30  
sfrq 300.078 dof 0  
tn H1 dimm nnc  
at 1.998 dimf 200  
np 20000 wtfile  
sw 5005.0 not used ft  
fb not used proc  
bs 4 fn not used  
pwr 52 wevr  
d1 7.0 wexp  
dl 2.000 wbs  
tof 0 wnt  
nt 32 wnt  
ct 24  
alock not used  
gain FLACS  
il n  
in n  
dp n y  
DISPLAY  
sp -75.5  
wp 2472.7  
vs 120  
sc 250  
hzmm 97.89  
ls 500.00  
rfl 945.9  
th 0  
ins 100.000  
nm cdc ph

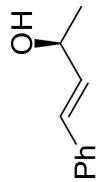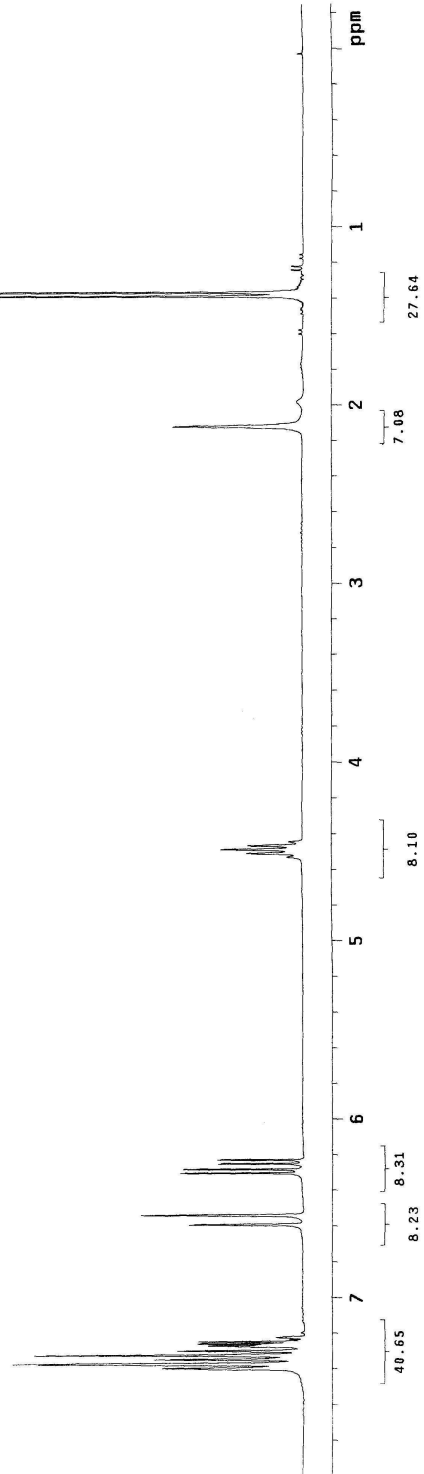



led-VII-109-r-C13

exp1 std13c

SAMPLE DEC. & VT  
date Sep 14 2007 dfrq 300.078  
solvent CDC13 dn H1  
file exp dpwr 37  
ACQUISITION exp dof 0  
sfrq 75.452 dny ny  
in c13 dnm 10400  
at 1.000 dimf 10400  
np 40000 lb PROCESSING  
sw 20000.0 lb wtfile 1.00  
fb not used  
ds 4 proc ft  
bwr 50 fn not used  
d1 40  
d2 1.000 werr  
tof 1.000 wexp  
nt 0 wbs  
ct 112 wnt  
alock n  
gain not used  
fl n  
in n  
dp DISPLAY y  
sp 511.6  
wp 11931.5  
sc 87  
wc 250  
hzmh 47.73  
is 500.00  
rf1 8258.9  
rfp 5827.3  
ins 2  
ai no ph 100.000

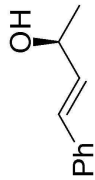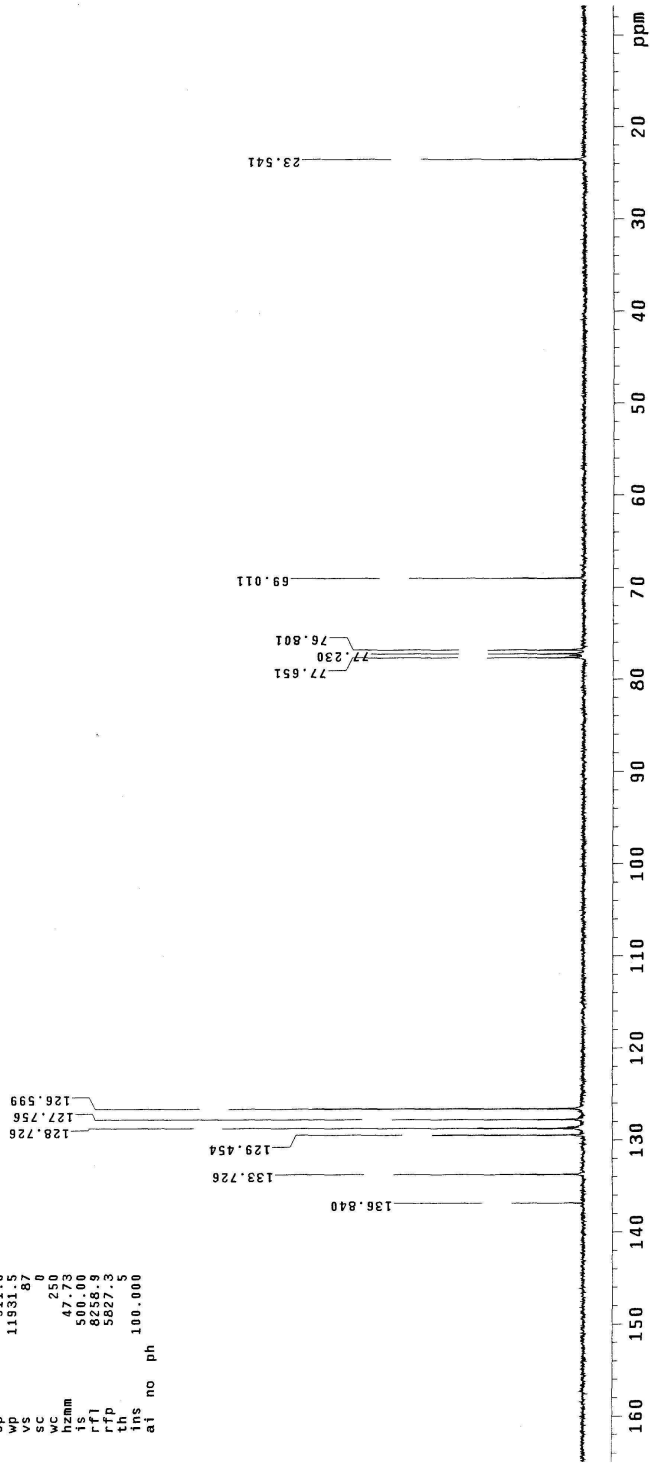

```

expl stdih
SAMPLE 5 2008 DEC. & VT
date Mar 5 2008 dfrq 300.078
solvent CDCl3 dn H1
file CDC13 exp 30
ACQUISITION dpwr 0
sfrq 300.078 dm nnn
at 1.898 dmm 200 C
sp 5005.0 wfile
bs not used proc ft
tpwr 58 fn not used
pw 1.0 werr
dt 2.000 wexp
tof 30 wds
ct 20 wnt
alock n
gain not used
FLAGS
il n
in n
dp y
DISPLAY
SP -84.4
WD 2854.3
VS 158
SC 0
WC 250
hzmm 11.42
rf 945.9
rfp 0
th 7
ins 1.000
nm cdc ph

```

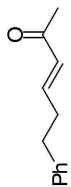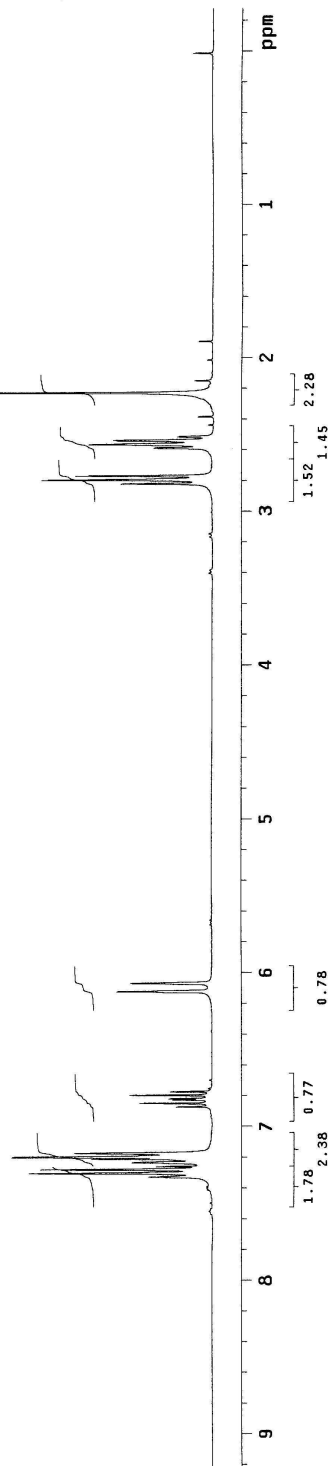

1ed-VII-153-i8-C13

expl std13c

SAMPLE DEC. & VI  
date Mar 5 2008 dfrq 300.078  
solvent COCl3 dn H1  
file ACQUISITION exp 37  
sfrq 75.462 dm nvy 0  
in 1 C13 dmm 10400 W  
ns 4000 dmr PROCESSING 1.00  
SW 20000.0 lb wifile ft  
bs not used 56 fn not used  
tpwr 4.4  
pw 4.4  
d1 0 werr  
v2 1.000 wexp  
v3 0 wbs  
ct 2000 wnt  
ct 184  
alock n  
gain not used  
flags  
ll n  
ln n  
dp DISPLAY y  
sp -175.5  
wp 17029.9  
vq 226  
sc 0  
wc 250  
hzm 68.12  
hzm 500.00  
sfl 5629.1  
tff 5629.1  
th 4  
ins 100.000  
at no ph

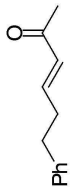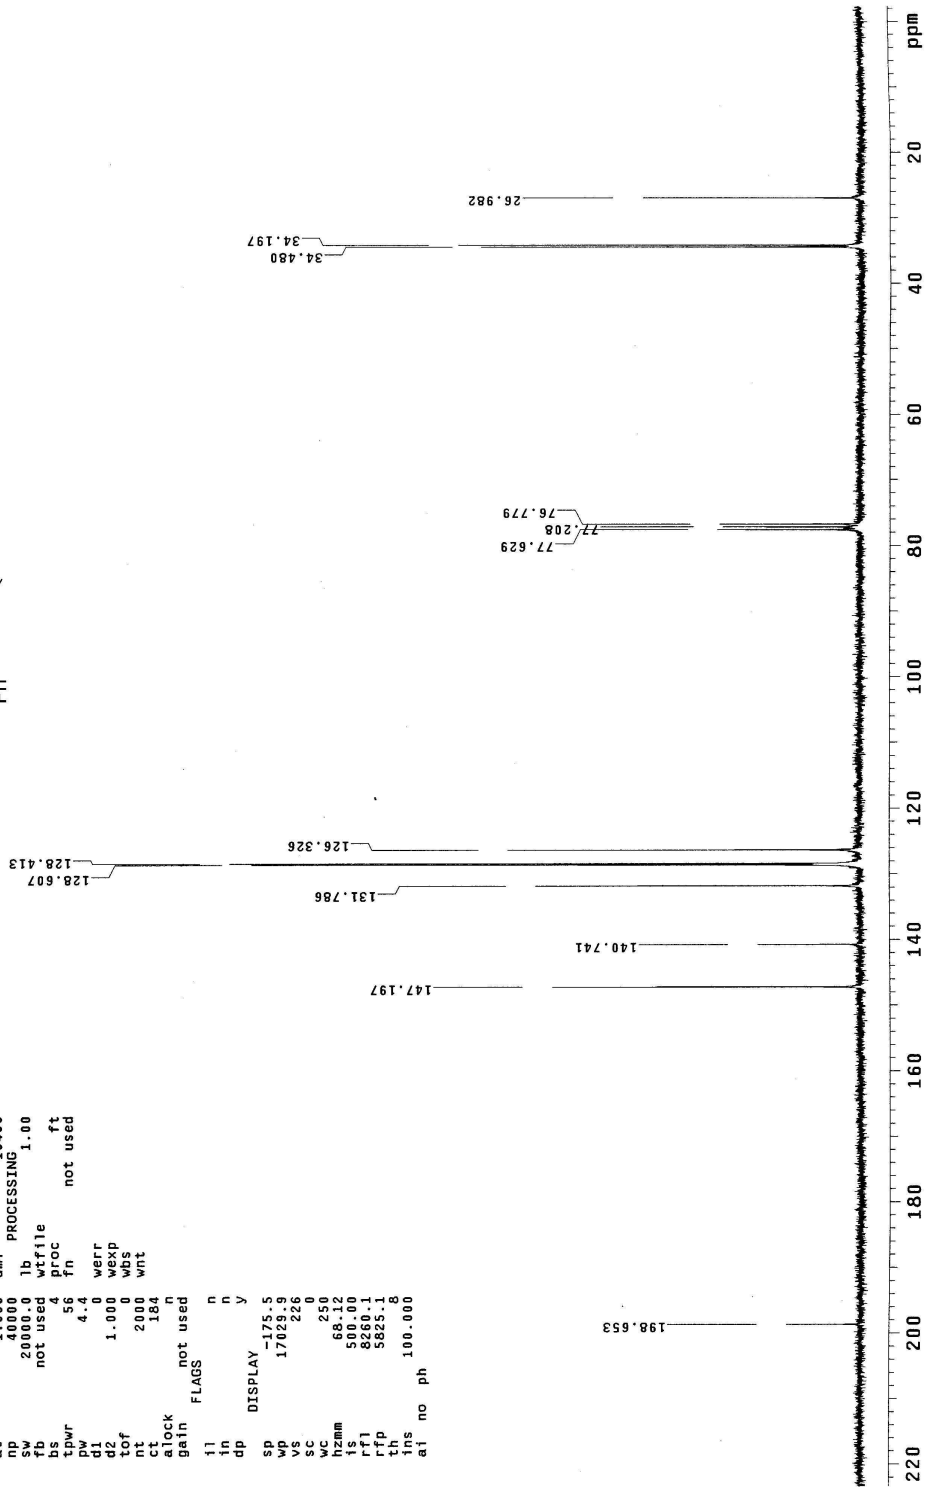

led-VII-154

expl std1h

SAMPLE DEC. & VT  
date Oct 8 2007 dfrq 300.078  
solvent CDCl3 dn H1  
file ACQUISITION exp 30  
sfrq 300.078 dm nnn  
tn 1.998 dm C  
at 20000 dmf 200  
np 5005.0 wtfile ft  
fb not used proc not used  
bs 4  
tpwr 58 weff  
flw 100 wexp  
rf 2.000 wps  
tof 0 wnt  
nt 32  
ct 20  
alock n  
gain not used  
flags  
il n  
in n  
dp y  
SD -44.9  
WD 2722.6  
VS 109  
SC 0  
WC 250  
hzm 10.89  
ls 500.00  
rfi 945.3  
rfp 5  
th 1.000  
ins  
nm cdc ph

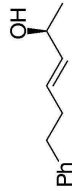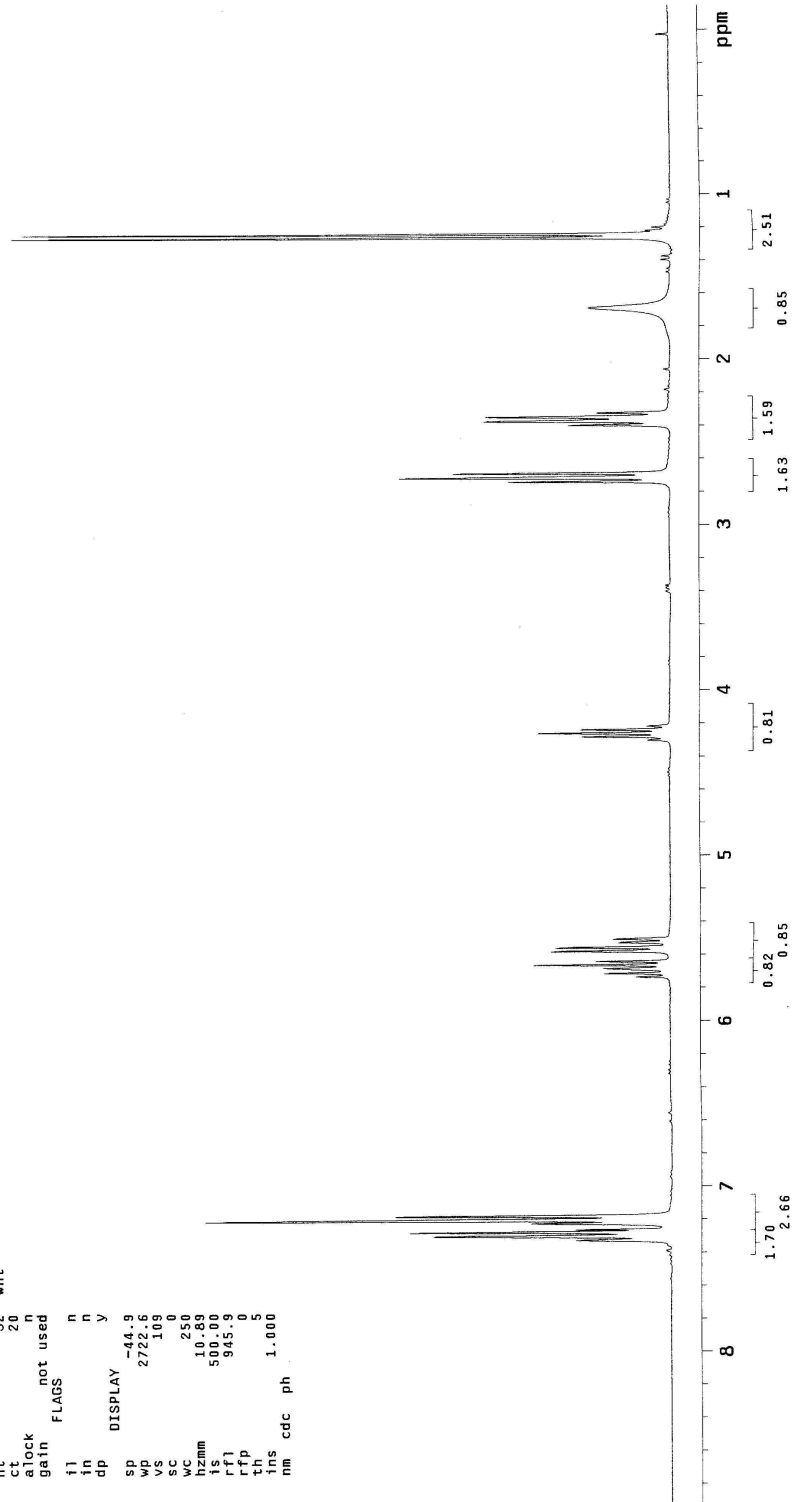

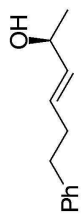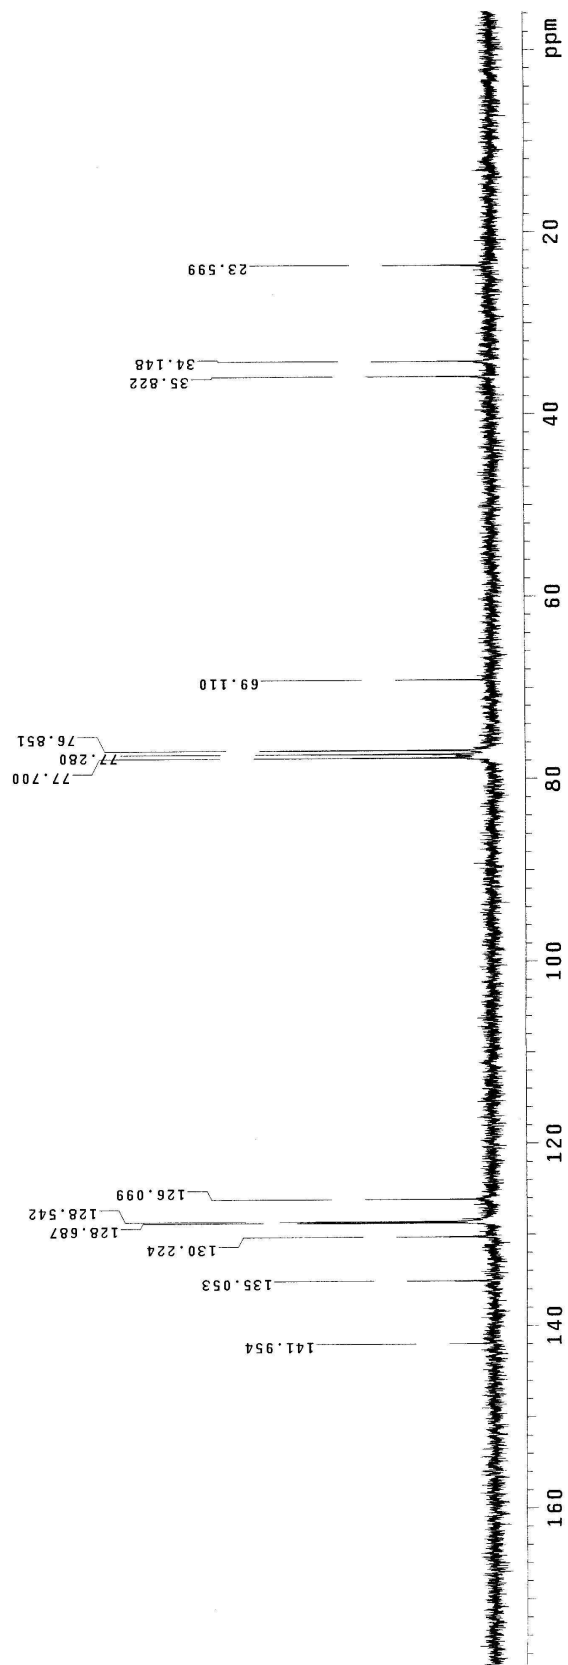

led-viii-31-13

expl stdih

```

SAMPLE          DEC. & VT
date Jan 24 2019   dfrq 300.078
fil /data/falk/D  H1
r11/led-viii-31-13- dpr 30
                        dm 0
                        ddf 0
                        nnn
ACQUISITION     dmm 200
sfrq 300.078    dmf 200
tn H1
at 1.896        wfile
sp 2005.0       proc
sv 5005.0       fn
fb not used
bs 4            werr
tpwr 58         wexp
pw 7.2         wbs
dl 2.000       wnt
tof 0
nt 32
rt 26
alock
gain not used
FLAG
il n
in n
dp y
SP DISPLAY
vp 122.5
vc 230052
sc 150
wc 250
hzmm 11.63
fs 2262.27
rfi 944.6
rfp 0
lms 6
nm cdc ph 1.000

```

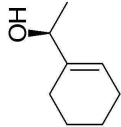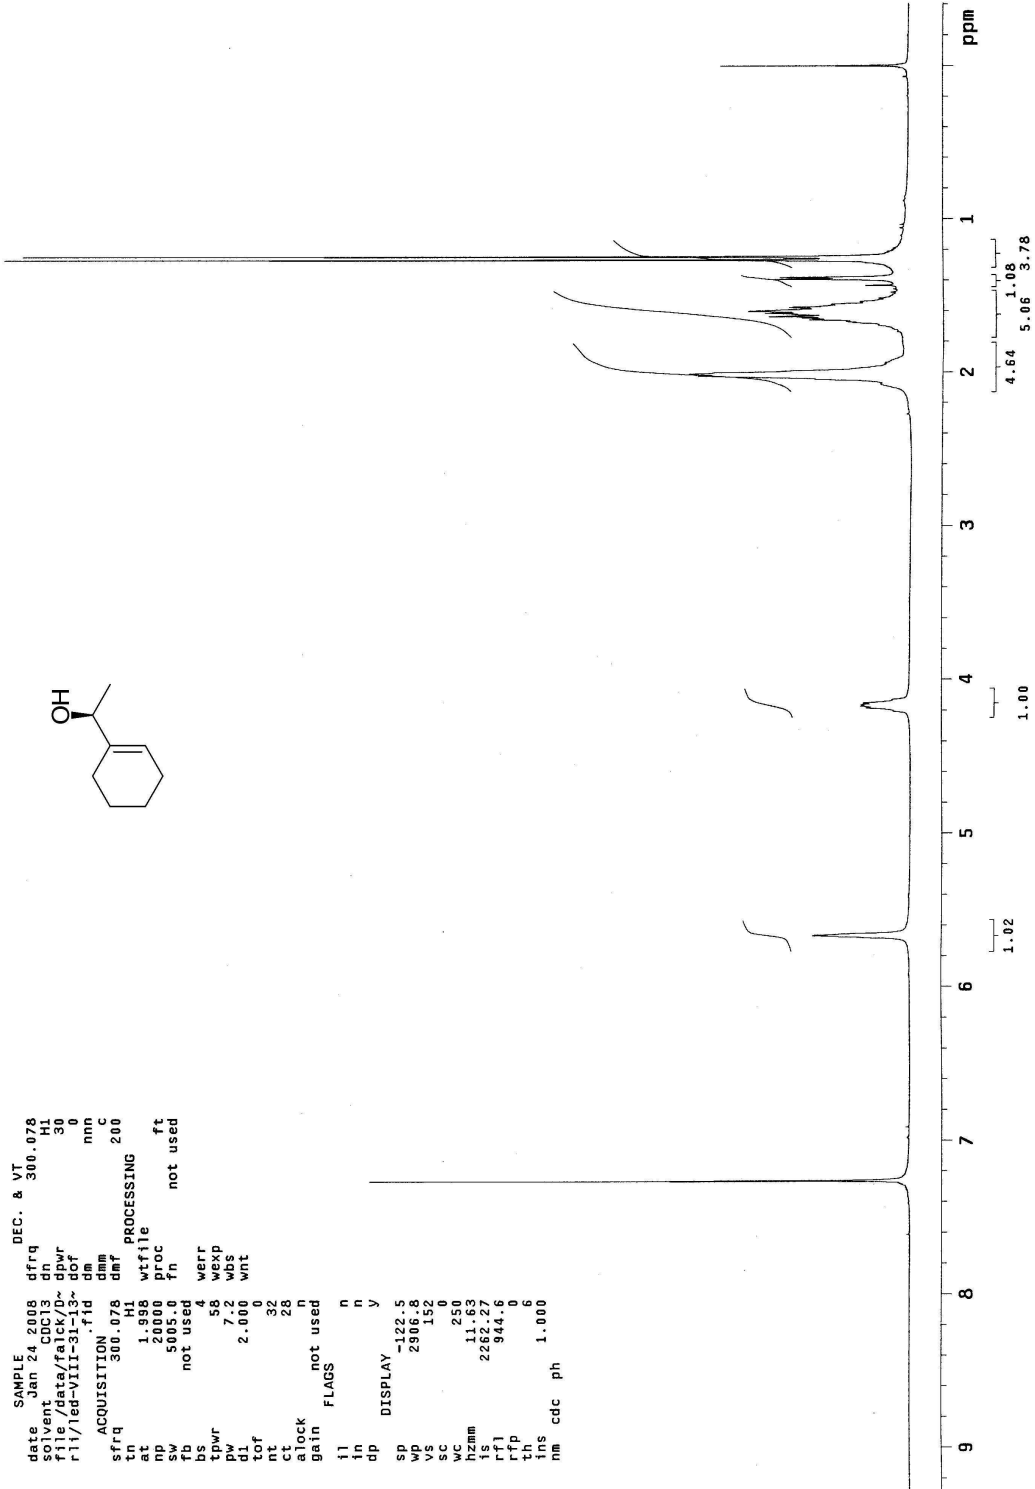

1ed-VIII-31-13-C13

expl std13c

SAMPLE DEC. & VT  
date Jan 25 2008 dfrq 300.078  
solvent Jan CDC13 dn HI  
fileid exp 37  
ACQUISITION exp 37  
sfreq 75.462 dm nvy  
in C13 dmf 10400 w  
at 1.000 dmf PROCESSING 1.00  
np 40000 lb  
sw 20000.0 wf file  
td not used  
ts 56 proc ft  
bwr 4.4 fn not used  
d1 1.000 werr  
d2 1.000 wexp  
tof 0 wbs  
nt 2000 wnt  
ctack 616  
alock n  
gain not used  
FLAG n  
l1 n  
in n  
dp n  
SP DISPLAY 480.2 y  
wp 1713.2  
sc 1628  
vc 250  
hzmm 68.54  
fs 500.00  
rf1 8252.2  
rfp 5827.3  
in 1  
sfs 100.000  
at no ph

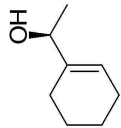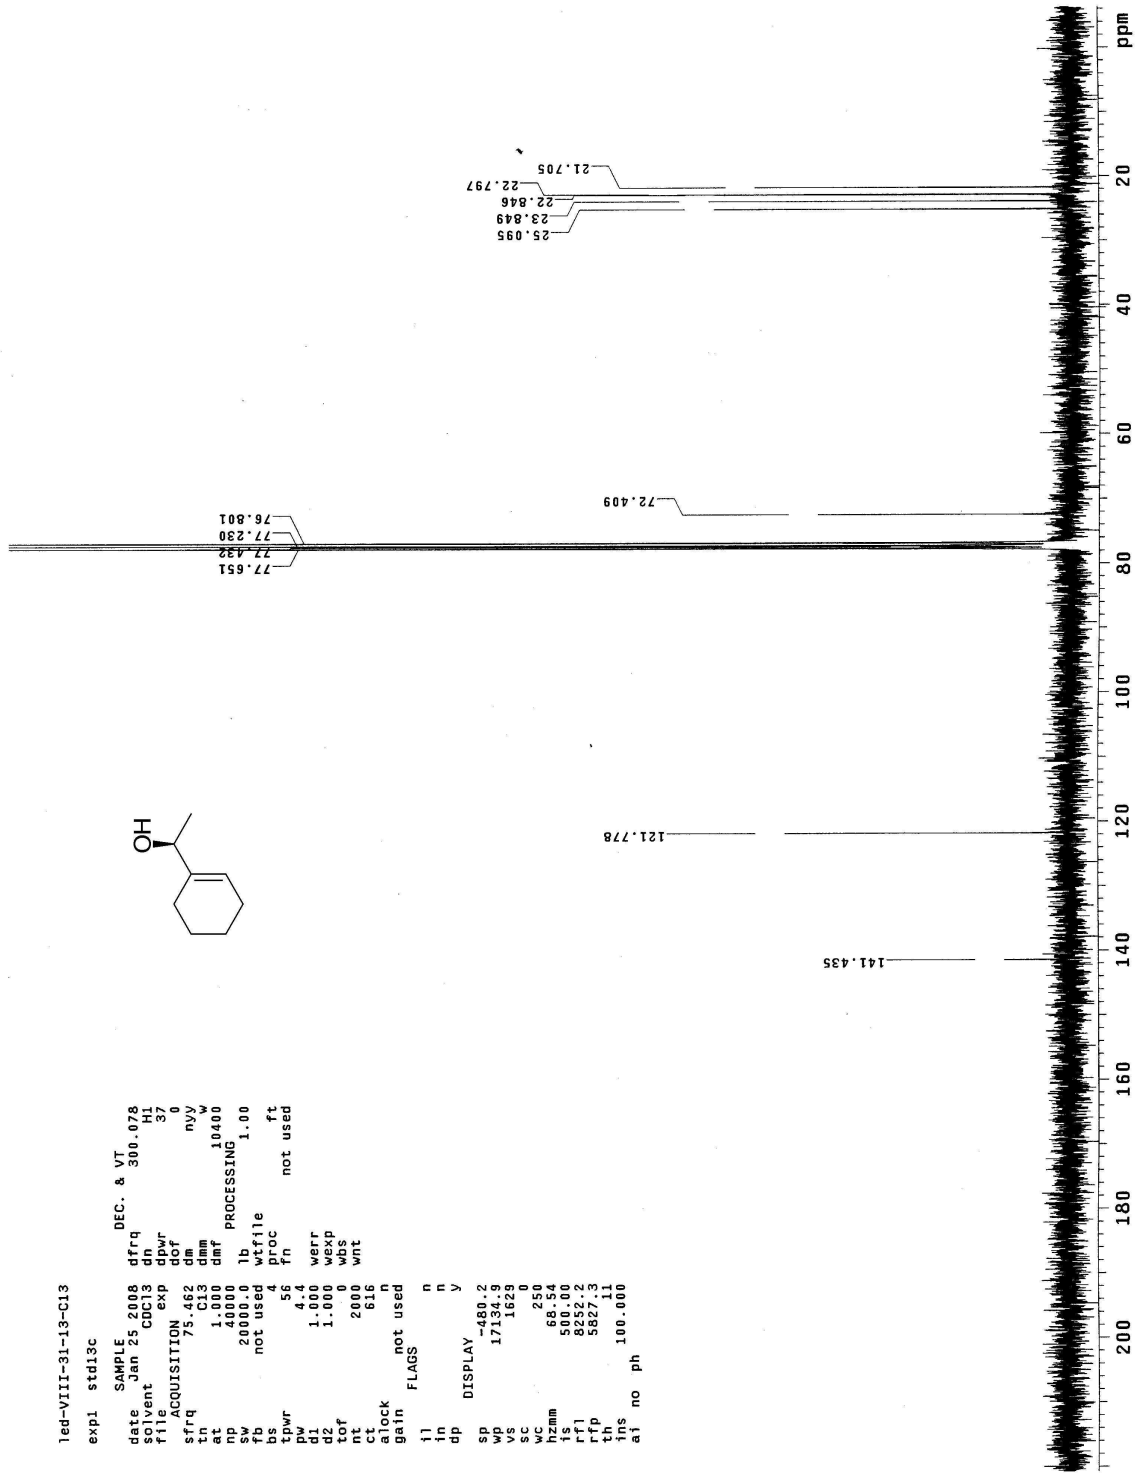

1ed-VII-97-18

exp1 std1h

date SAMPLE 9 2008 DEC. & VT  
file solvent Feb CDC13 dn dfrq 300.078  
exp exp H1 dpwr 30  
ACQUISITION dof 0  
sfrq 380.078 dm nnn  
tn H1 dmm 200  
at 1.898 dmf wtfile  
cp 2000 5000 proc  
fb not used ft  
bs 4 fn not used  
tpwr 58  
pw 7.2 werr  
d1 2.000 wexp  
tof 0 wbs  
nt 32 wnt  
ct 20  
a'lock not used  
gain FLAGS  
il n  
in n  
dp y  
SP DISPLAY -5.5  
wp 2656.9  
vs 120  
sc 0  
wc 250  
hzmm 10.63  
ls 500.00  
rfi 945.9  
rfp 3  
th 3  
ins cdc 3.000  
nm cdc ph

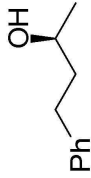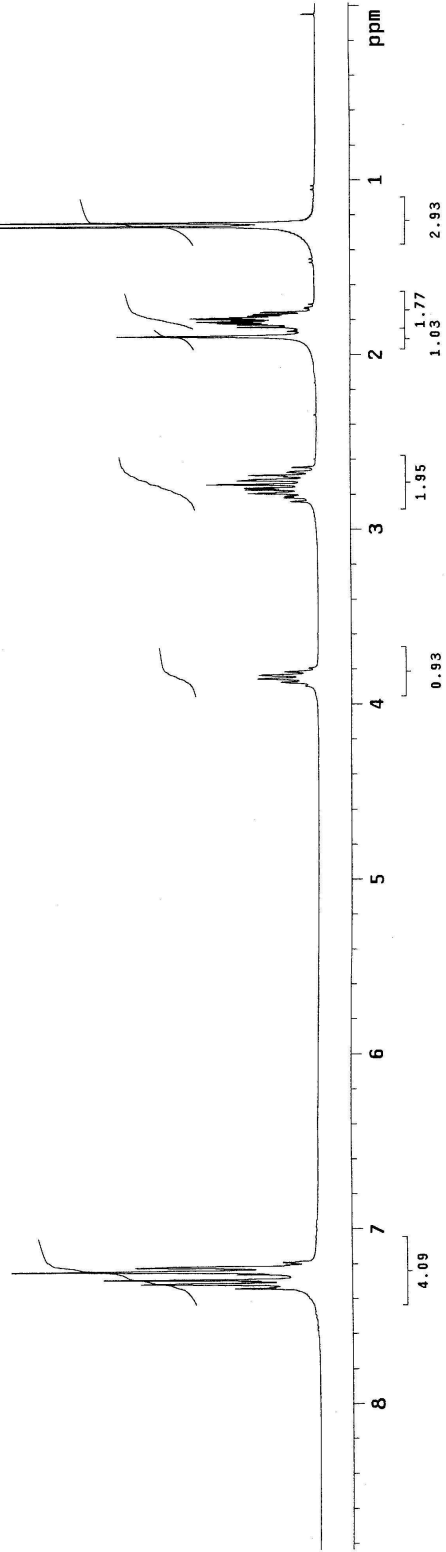



13C OBSERVE

exp1 stdi3c

date SAMPLE DEC. & VT  
Feb 9 2008  
solvent CDCl3 dfrq 300.078  
P11 ACQUISITION exp dn 51  
ddr 57  
dm 0  
sfrq 75.462 dm nuy  
in 1.000 dm 10400  
at 1.000 dmf PROCESSING  
np 40000 lb 1.00  
sw 20000.0 wtfile  
fb not used 4 proc ft  
bs 56 fn not used  
tpwr 4.4  
pw 0 werr  
d1 1.000 wexp  
d2 2000 wps  
nt 176 wnt  
ct 176  
alock n  
gain not used  
il n  
in n  
ip n  
dp y  
DISPLAY  
sp -1410.9  
wp 16583.1  
vs 145  
sc 0  
wc 250  
hzmm 66.33  
ls 500.00  
rf1 8260.8  
rfp 5825.1  
th 8  
ins 100.000  
at no ph

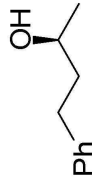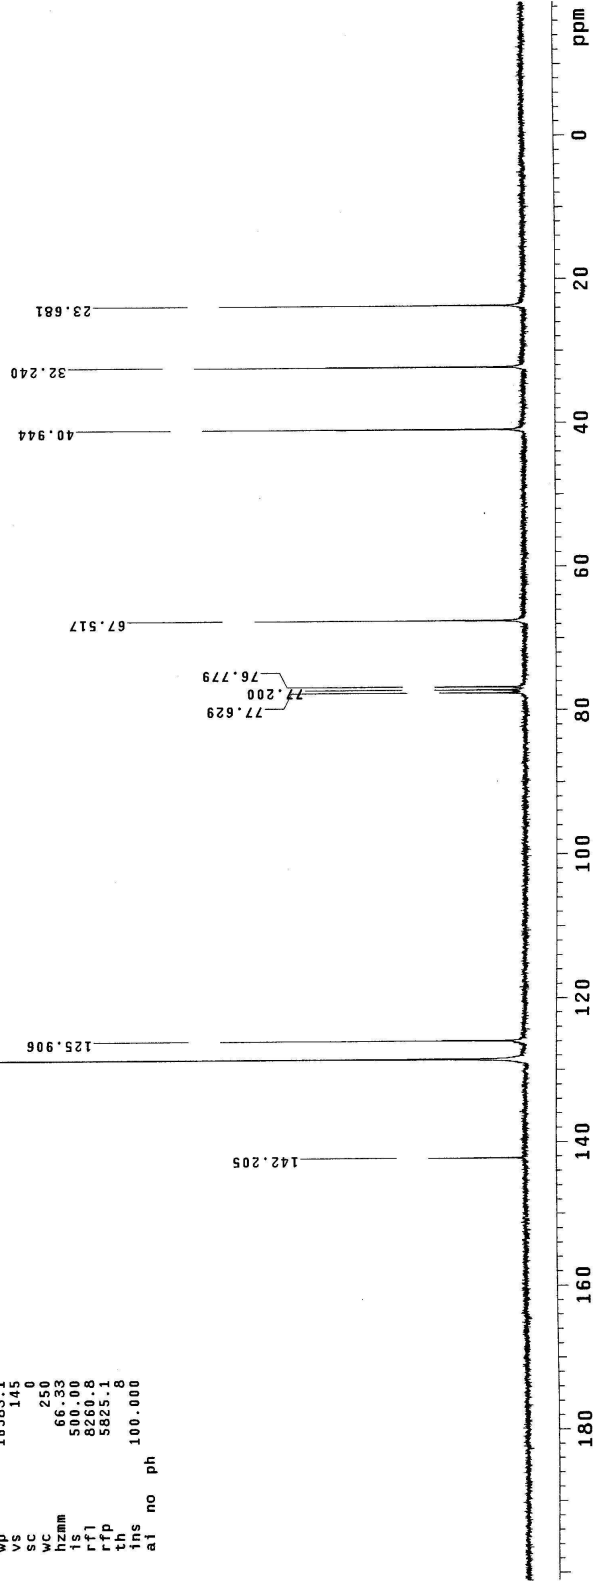

led-VIII-55

expi stdlh

SAMPLE DEC. & VT  
date Feb 13 2008 dfrq 300.078  
solvent CCl3 dn H1  
file C0C13 exp 30  
ACQUISITION 078 dpr 0  
300.078 dpr nnc  
tfrq 300.078 dm 200  
at 1.998 dmf PROCESSING  
np 20000 sw 5005.0 wtfile  
fb not used proc ft  
bs 4 fn not used  
tpwr 58  
pw 7.02 werr  
to 2.00 wexp  
nt 0 wscp  
ct 32 wst  
ct 20  
alock n  
gain not used  
FLAGS  
ll n  
in n  
dp n  
SP DISPLAY -51.7  
wp 2380.9  
vs 200  
sc 0  
wc 250  
hzmm 9.44  
ls 500.00  
rfi 945.9  
th 65  
ins cdc ph  
nm 1.000

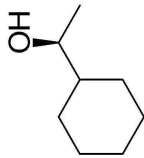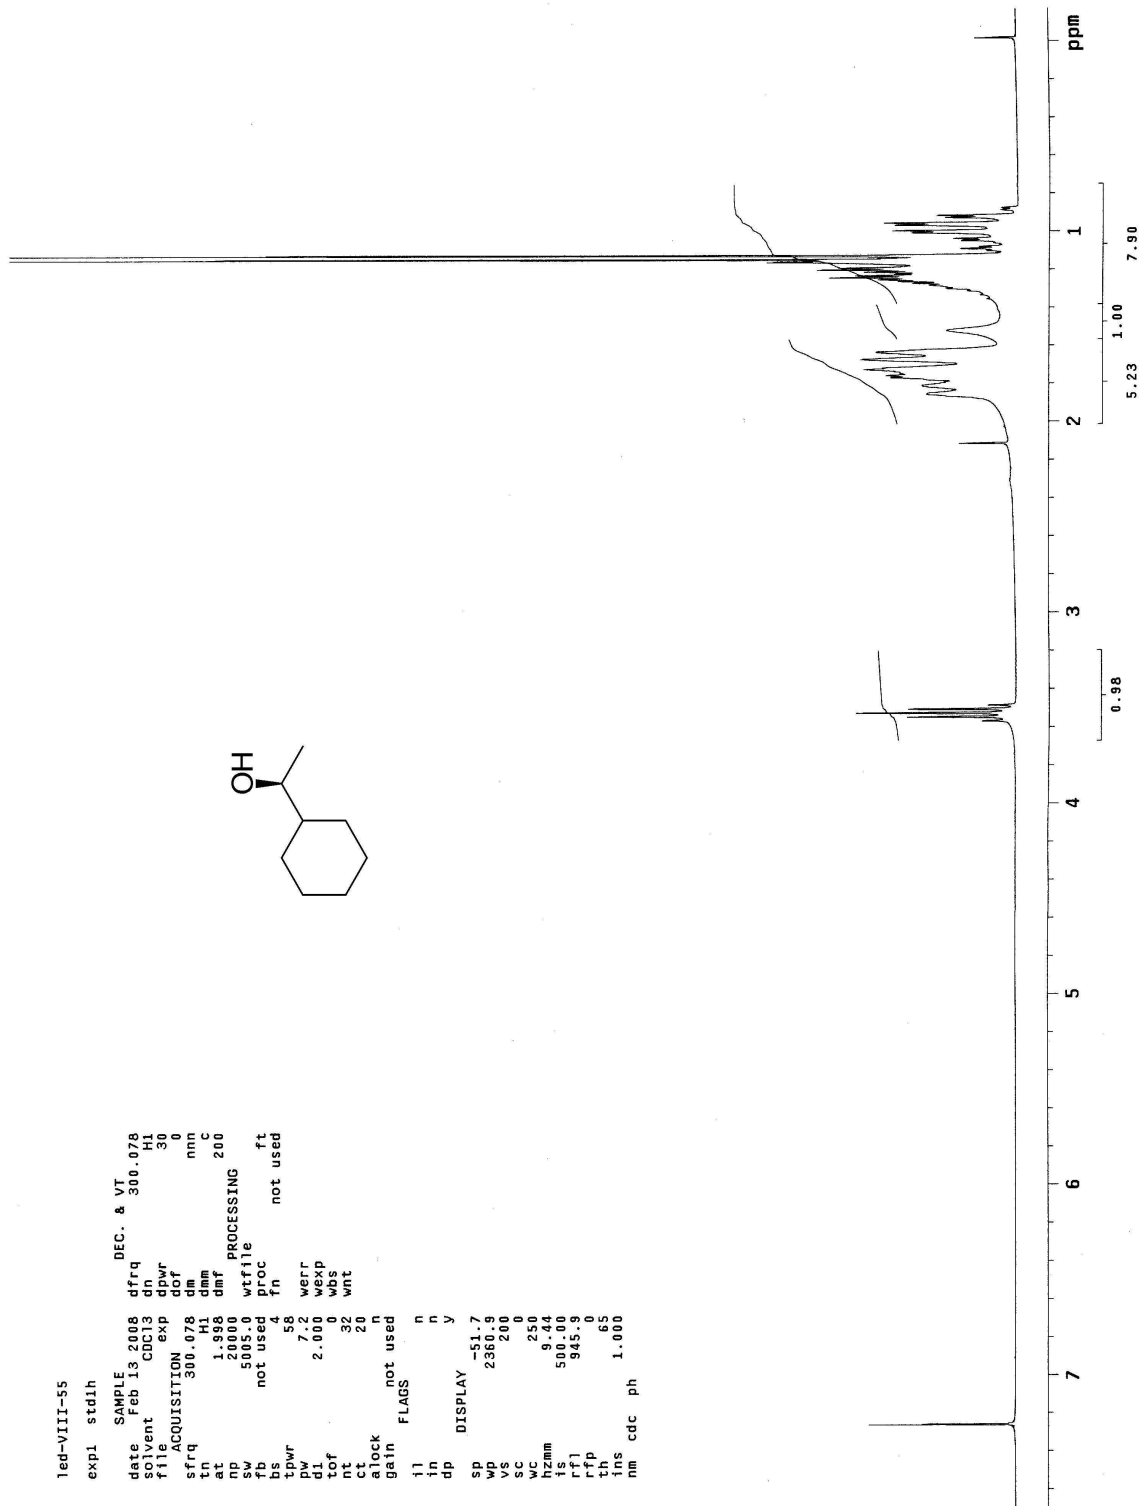

led-viii-55-c13

exp1 std13c

SAMPLE DEC. & VT  
date Feb 13 2008 dfrq 300.078  
scent CDCl3 dn H1  
file exp 37  
ACQUISITION exp 0  
sfrq 75.462 dm nvv  
tn C13 dmm 10400 w  
at 1.000 dmf PROCESSING  
np 40000 lb  
sw 20000.0 wtfile 1.00  
fb not used 4  
bs 56 ft  
tpwr 4.4 fn not used  
pw 4.4 werr  
d1 0 wexp  
d2 1.000 wbs  
tof 0 wnt  
nt 1000  
ct 40  
alock not used  
gain  
FLAGS  
il n  
in n  
in n  
dp y  
SP DISPLAY -141.9  
WD 13087.6  
VS 234  
SC 0  
WC 250  
hzmh 52.35  
IS 500.00  
rf1 8253.4  
rff 5825.1  
th 14  
ins 100.000  
ai no ph

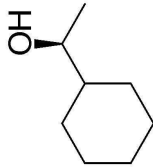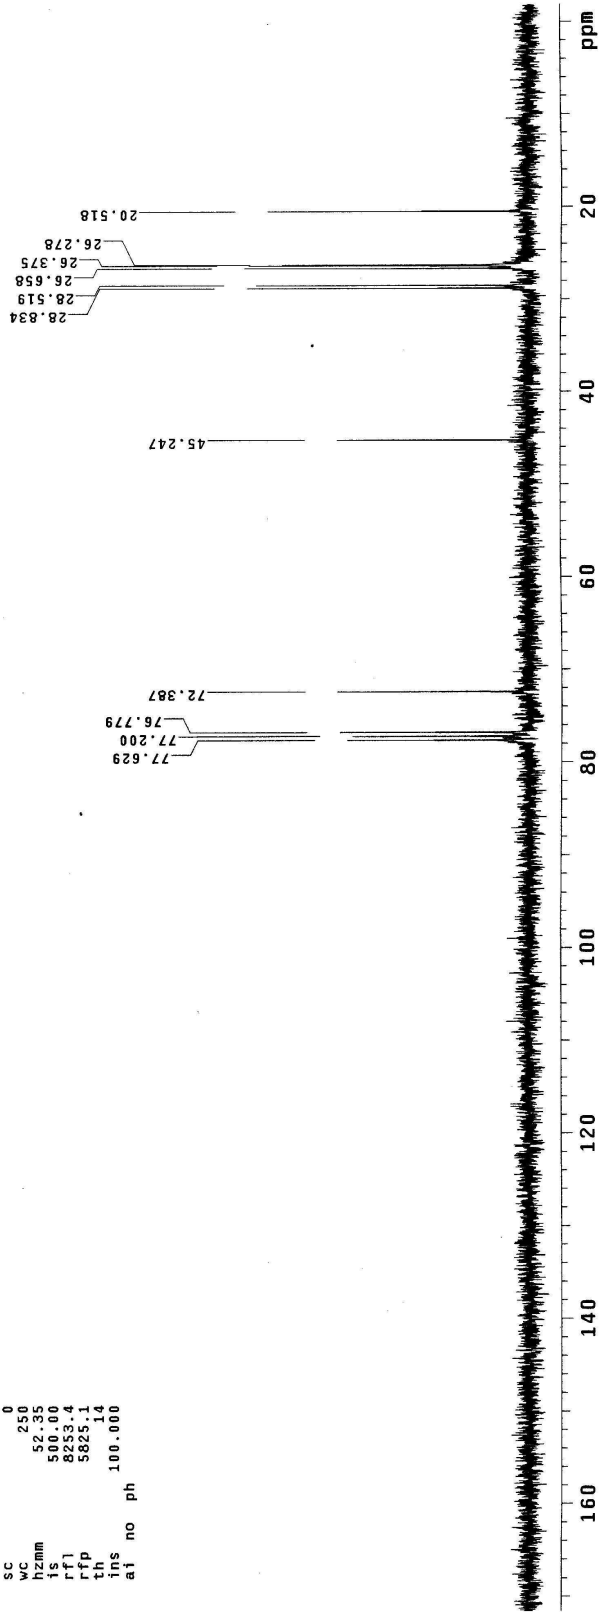

Supplement: NIHMS191219-supplement-1_si_001.pdf [file NIHMS191219-supplement-1_si_001.pdf]
